# Supplementary material for: Palladium-catalyzed reductive coupling of phenols with anilines and amines: efficient conversion of phenolic lignin model monomers and analogues to cyclohexylamines
Source: PubMed Central journal article supplement — Chem Sci. 2015 Apr 30;6(7):4174–8. doi: 10.1039/c5sc00941c (PMC5707487; doi:10.1039/c5sc00941c), 2015-04-30

# Supporting Information

## **Palladium-catalyzed reductive coupling of phenols with anilines and amines: efficient conversion of phenolic lignin model monomers and analogues to cyclohexylamines**

Zhengwanag Chen,<sup>†‡</sup> Huiying Zeng,<sup>†</sup> Hang Gong,<sup>†</sup> Haining Wang,<sup>†</sup> and Chao-Jun Li<sup>\*†</sup>

<sup>†</sup>Department of Chemistry and FQRNT Centre for Green Chemistry and Catalysis,  
McGill University, Montreal, QC H3A 0B8, Canada,

<sup>‡</sup>School of Chemistry and Chemical Engineering, Gannan Normal University,  
Ganzhou 341000, PR China

[cj.li@mcgill.ca](mailto:cj.li@mcgill.ca)

## **List of Contents**

|                                                                            |     |
|----------------------------------------------------------------------------|-----|
| A. General method .....                                                    | 2S  |
| B. Optimization of the reaction conditions .....                           | 2S  |
| C. General procedure for the reductive coupling of phenol with amine ..... | 5S  |
| D. Analytical data .....                                                   | 5S  |
| E. NMR Spectra .....                                                       | 14S |

## A. General method

$^1\text{H}$  and  $^{13}\text{C}$  NMR spectra were obtained on a 500 MHz NMR spectrometer. The chemical shifts are referenced to signals at 7.26 and 77.0 ppm, respectively, using chloroform as solvent with TMS as the internal standard unless otherwise noted. Mass spectra were recorded on a GC-MS spectrometer at an ionization voltage of 70 eV equipped with a DB-WAX capillary column (internal diameter: 0.25 mm, length: 30 m). Silica gel (300-400 mesh) was used for flash column chromatograph, eluting (unless otherwise stated) with an ethyl acetate/petroleum ether (PE) (60-90 °C) mixture.

## B. Optimization of the reaction conditions

### 1) Study of catalysts

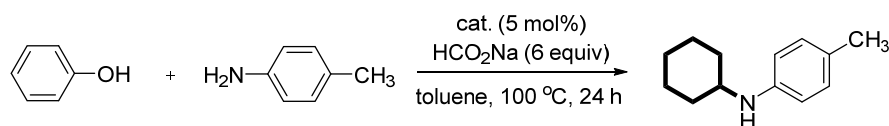

| Entry | Catalyst                                                   | Yield <sup>a</sup> /% | Entry | Catalyst                                 | Yield <sup>a</sup> /% |
|-------|------------------------------------------------------------|-----------------------|-------|------------------------------------------|-----------------------|
| 1     | $\text{Cu}(\text{CO}_2\text{CF}_3)\cdot\text{H}_2\text{O}$ | N.P.                  | 7     | AuCN                                     | N.P.                  |
| 2     | $[\text{RuCp}^*\text{Cl}_2]\text{n}$                       | N.P.                  | 8     | $\text{CoCl}_2$                          | N.P.                  |
| 3     | AgOTf                                                      | N.P.                  | 9     | $\text{FeCl}_3$                          | N.P.                  |
| 4     | $\text{NiCl}_2(\text{PPh}_3)_2$                            | N.P.                  | 10    | $\text{Ga}(\text{acac})_3$               | N.P.                  |
| 5     | $\text{In}(\text{OAc})_3$                                  | N.P.                  | 11    | $(\text{CO})(\text{PPh}_3)_2\text{RhCl}$ | N.P.                  |
| 6     | $\text{Pt}(\text{COD})\text{Cl}_2$                         | N.P.                  | 12    | $\text{Ph}_3\text{Bi}$                   | N.P.                  |

Conditions: phenol (0.20 mmol), *p*-toluidine (0.20 mmol), catalyst (5 mol%), sodium formate (6 equiv) and toluene (0.8 mL) at 100 °C for 24 h under an argon atmosphere. <sup>a</sup> Yields were determined by GC analysis with mesitylene as internal standard.

### 2) Study of palladium catalysts

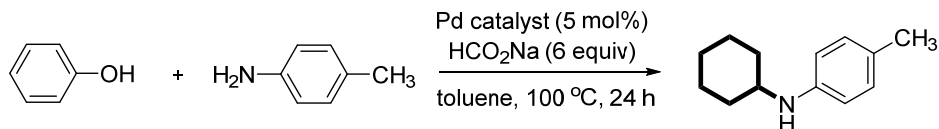

| Entry | Catalyst                                | Yield <sup>a</sup> /% | Entry | Catalyst                                           | Yield <sup>a</sup> /% |
|-------|-----------------------------------------|-----------------------|-------|----------------------------------------------------|-----------------------|
| 1     | $\text{Pd}/\text{CaCO}_3$ (5% content)  | trace                 | 10    | $\text{Pd}(\text{CH}_3\text{CN})_2\text{Cl}_2$     | N.P.                  |
| 2     | $\text{PdCl}_2$                         | N.P.                  | 11    | $\text{Pd}(\text{OH})_2$                           | 24                    |
| 3     | $[\text{PdCl}(\text{C}_3\text{H}_5)]_2$ | N.P.                  | 12    | $\text{PdCl}_2(\text{binap})$                      | N.P.                  |
| 4     | $\text{Pd}(\text{dba})_2$               | 34                    | 13    | $\text{Pd}(\text{CH}_3\text{CN})_4(\text{BF}_4)_2$ | N.P.                  |
| 5     | $\text{Pd}(\text{OAc})_2$               | N.P.                  | 14    | $\text{Pd}/\text{BaSO}_4$ (5% content)             | N.P.                  |
| 6     | $\text{PdCl}_2(\text{dtbpf})$           | N.P.                  | 15    | $\text{Pd}/\text{C}$ (10% content)                 | 83                    |
| 7     | $\text{Pd}(\text{acac})_2$              | N.P.                  | 16    | -                                                  | N.P.                  |

|   |                                                      |      |                 |                   |         |
|---|------------------------------------------------------|------|-----------------|-------------------|---------|
| 8 | Pd(NO <sub>3</sub> ) <sub>2</sub> ·2H <sub>2</sub> O | N.P. | 17 <sup>b</sup> | Pd/C <sup>b</sup> | 94      |
| 9 | Pd(PPh <sub>3</sub> ) <sub>4</sub>                   | N.P. | 18 <sup>c</sup> | Pd/C <sup>c</sup> | 95 (92) |

Conditions: phenol (0.20 mmol), *p*-toluidine (0.20 mmol), Pd catalyst (5 mol%), sodium formate (6 equiv) and toluene (0.8 mL) at 100°C for 24 h under an argon atmosphere. <sup>a</sup>Yields were determined by GC analysis with mesitylene as internal standard; isolated yields in brackets. <sup>b</sup>Pd/C (10 mol%) was used. <sup>c</sup>Pd/C (7 mol%) was used.

### 3) Study of the amount of sodium formate

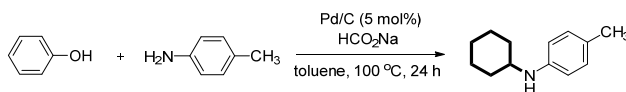

| Entry | Sodium formate | Yield <sup>a</sup> /% |
|-------|----------------|-----------------------|
| 1     | 10%            | trace                 |
| 2     | 30%            | trace                 |
| 3     | 60%            | 23                    |
| 4     | 1 equiv        | 37                    |
| 5     | 2 equiv        | 58                    |
| 6     | 4 equiv        | 65                    |
| 7     | 6 equiv        | 83                    |

Conditions: phenol (0.20 mmol), *p*-toluidine (0.20 mmol), Pd/C (5 mol%), and toluene (0.8 mL) at 100°C for 24 h under an argon atmosphere. <sup>a</sup> Yields were determined by GC analysis with mesitylene as internal standard.

### 4) Study of ligands

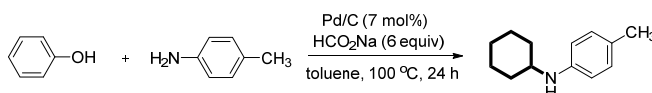

| Entry | Ligand                                   | Yield <sup>a</sup> /% |
|-------|------------------------------------------|-----------------------|
| 1     | 1,4-bis(diphenylphosphino)butane         | N.P.                  |
| 2     | 1,1'-bis(dicyclohexylphosphino)ferrocene | N.P.                  |
| 3     | Bianp                                    | 12                    |
| 4     | 2-picolinic acid                         | 88                    |
| 5     | 1,10-phen                                | 64                    |
| 6     | tri(4-methoxy phenyl) phosphine          | N.P.                  |
| 7     | DPPF                                     | N.P.                  |
| 8     | 1,3-bis(diphenylphosphino)propane        | N.P.                  |

Conditions: phenol (0.20 mmol), *p*-toluidine (0.20 mmol), Pd/C (7 mol%), ligand (15 mol%), sodium formate (6 equiv) and toluene (0.8 mL) at 100°C for 24 h under an argon atmosphere. <sup>a</sup> Yields were determined by GC analysis with mesitylene as internal standard.

### 5) Study of solvents

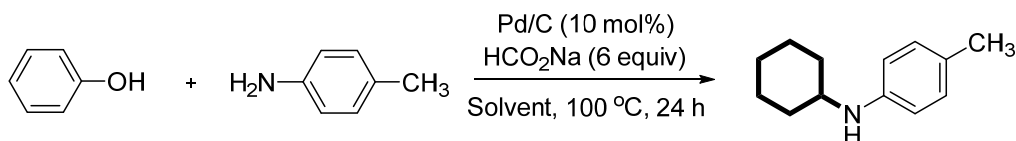

| Entry | Solvent          | Yield <sup>a</sup> /% | Entry | Solvent     | Yield <sup>a</sup> /% |
|-------|------------------|-----------------------|-------|-------------|-----------------------|
| 1     | THF              | 89                    | 5     | 1,4-dioxane | 86                    |
| 2     | EtOH             | 47                    | 6     | DMF         | N.P.                  |
| 3     | MeCN             | N.P.                  | 7     | DMSO        | N.P.                  |
| 4     | H <sub>2</sub> O | 80                    | 8     | PhCl        | N.P.                  |

Conditions: phenol (0.20 mmol), *p*-toluidine (0.20 mmol), Pd/C (10 mol%), sodium formate (6 equiv) and solvent (0.8 mL) at 100°C for 24 h under an argon atmosphere. <sup>a</sup> Yields were determined by GC analysis with mesitylene as internal standard.

### 6) Study of acids and bases

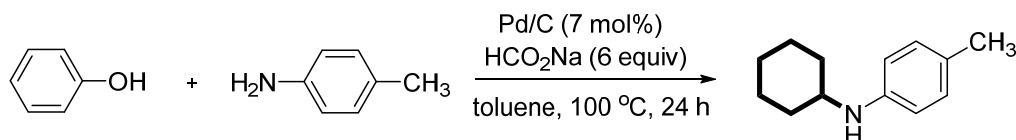

| Entry | Acid                               | Yield <sup>a</sup> /% | Entry | Base                            | Yield <sup>a</sup> /% |
|-------|------------------------------------|-----------------------|-------|---------------------------------|-----------------------|
| 1     | FeCl <sub>3</sub>                  | N.P.                  | 9     | K <sub>3</sub> PO <sub>4</sub>  | 57                    |
| 2     | LiF                                | 89                    | 10    | Cs <sub>2</sub> CO <sub>3</sub> | N.P.                  |
| 3     | SnCl <sub>2</sub>                  | 69                    | 11    | NaOMe                           | 90                    |
| 4     | ScOOCF <sub>3</sub>                | 71                    | 12    | DMAP                            | 95                    |
| 5     | ZnOSO <sub>2</sub> CF <sub>3</sub> | 88                    | 13    | NaO <sup>t</sup> Bu             | 89                    |
| 6     | CuCl <sub>2</sub>                  | N.P.                  | 14    | DBU                             | trace                 |
| 7     | CH <sub>3</sub> COOH               | 80                    | 15    | DABCO                           | 91                    |
| 8     | CF <sub>3</sub> COOH               | 84                    | 16    | TEA                             | 54                    |

Conditions: phenol (0.20 mmol), *p*-toluidine (0.20 mmol), Pd/C (7 mol%), sodium formate (6 equiv), additive (0.5 equiv) and toluene (0.8 mL) at 100°C for 24 h under an argon atmosphere. <sup>a</sup> Yields were determined by GC analysis with mesitylene as internal standard.

### 7) Study of temperature

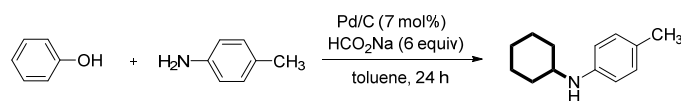

| Entry | temperature | Yield <sup>a</sup> /% |
|-------|-------------|-----------------------|
| 1     | 70          | 60                    |
| 2     | 80          | 73                    |
| 4     | 120         | 86                    |

Conditions: phenol (0.20 mmol), *p*-toluidine (0.20 mmol), Pd/C (7 mol%), sodium formate (6 equiv), and toluene (0.8 mL) for 24 h under an argon atmosphere. <sup>a</sup> Yields were determined by GC analysis with mesitylene as internal standard.

## C. General procedure for the reductive coupling of phenol with amine

In a 5 mL microwave vial were combined phenol (0.20 mmol), amine (0.20 mmol), Pd/C (10 wt%, 14.84 mg, 7 mol% based on Pd contents) and sodium formate (1.2 mmol) in toluene (0.8 mL). The mixture was then stirred at 100 °C for 24 h under an argon atmosphere. The mixture was then diluted with ethyl acetate (3 mL), filtered and eluted through a short silica gel plug with more ethyl acetate (2 x 3 mL). Solvent was removed, and the residue was separated by column chromatography to give the pure sample.

## D. Analytical data

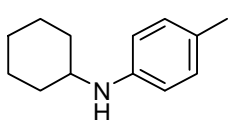

**N-cyclohexyl-4-methylaniline (3a)**

$^1\text{H NMR}$  (500 MHz,  $\text{CDCl}_3$ ):  $\delta$  = 6.97 (d,  $J$  = 7.5 Hz, 2H), 6.53 (d,  $J$  = 7.5 Hz, 2H), 3.22 (t,  $J$  = 10.0 Hz, 1H), 2.23 (s, 3H), 2.05 (d,  $J$  = 12.0 Hz, 2H), 1.75 (d,  $J$  = 13.5 Hz, 2H), 1.65 (d,  $J$  = 12.5 Hz, 1H), 1.39-1.32 (m, 2H), 1.23 (t,  $J$  = 12.5 Hz, 1H), 1.69-1.09 (m, 2H).  $^{13}\text{C NMR}$  (125 MHz,  $\text{CDCl}_3$ ):  $\delta$  = 145.0, 129.7, 126.1, 113.5, 52.1, 33.5, 25.9, 25.0, 20.3. MS (EI)  $m/z$ : 189, 160, 146, 131, 106, 91, 77, 55.

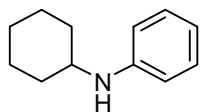

**N-cyclohexylaniline (3b)**

$^1\text{H NMR}$  (500 MHz,  $\text{CDCl}_3$ ):  $\delta$  = 7.17-7.14 (m, 2H), 6.66 (t,  $J$  = 7.5 Hz, 1H), 6.60 (d,  $J$  = 7.5 Hz, 2H), 3.28-3.22 (m, 1H), 2.07-2.04 (m, 2H), 1.78-1.74 (m, 2H), 1.67-1.63 (m, 1H), 1.41-1.33 (m, 2H), 1.27-1.16 (m, 1H), 1.19-1.11 (m, 2H).  $^{13}\text{C NMR}$  (125 MHz,  $\text{CDCl}_3$ ):  $\delta$  = 147.3, 129.2, 116.8, 113.1, 51.7, 33.5, 25.9, 25.0. MS (EI)  $m/z$ : 175, 146, 132, 118, 106, 93, 77, 65, 58, 51.

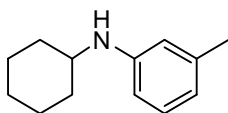

**N-cyclohexyl-3-methylaniline (3c)**

$^1\text{H NMR}$  (500 MHz,  $\text{CDCl}_3$ ):  $\delta$  = 7.05 (t,  $J$  = 8.0 Hz, 1H), 6.49 (d,  $J$  = 7.5 Hz, 1H), 6.41 (d,  $J$  = 7.0 Hz, 2H), 3.28-3.22 (m, 1H), 2.27 (s, 3H), 2.07-2.04 (m, 2H), 1.78-1.74 (m, 2H), 1.67-1.63 (m, 1H), 1.42-1.33 (m, 2H), 1.26-1.20 (m, 1H), 1.19-1.11 (m, 2H).  $^{13}\text{C NMR}$  (125 MHz,  $\text{CDCl}_3$ ):  $\delta$  = 147.3, 139.0, 129.1, 117.8, 113.9, 110.3, 51.7, 33.5, 25.9, 25.0, 21.6. MS (EI)  $m/z$ : 189, 160, 146, 132, 120, 107, 91, 77, 65, 55.

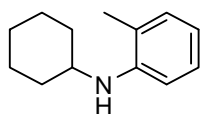

**N-cyclohexyl-2-methylaniline (3d)**

$^1\text{H NMR}$  (500 MHz,  $\text{CDCl}_3$ ):  $\delta$  = 7.13-7.10 (m, 1H), 7.06 (d,  $J$  = 7.0 Hz, 1H), 6.66-6.61 (m, 2H), 3.36-3.30 (m, 1H), 2.14 (s, 3H), 2.12-2.09 (m, 2H), 1.81-1.77 (m, 2H), 1.70-1.66 (m, 1H), 1.46-1.37 (m, 2H), 1.31-1.18 (m, 3H).  $^{13}\text{C NMR}$  (125 MHz,  $\text{CDCl}_3$ ):  $\delta$  = 145.2, 130.2, 127.0, 121.6, 116.2, 110.2, 51.5, 33.6, 26.0, 25.0, 17.5. MS (EI)  $m/z$ : 189, 160, 146, 132, 120, 107, 91, 77, 65, 55.

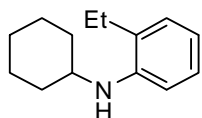

**N-cyclohexyl-2-ethylaniline (3e)**

$^1\text{H}$  NMR (500 MHz,  $\text{CDCl}_3$ ):  $\delta$  = 7.14-7.07 (m, 2H), 6.68 (t,  $J$  = 7.0 Hz, 2H), 3.37-3.32 (m, 1H), 2.51-2.47 (q,  $J$  = 7.5 Hz, 2H), 2.12-2.09 (m, 2H), 1.81-1.77 (m, 2H), 1.70-1.66 (m, 1H), 1.32-1.19 (m, 3H), 1.27 (t,  $J$  = 7.5 Hz, 3H).  $^{13}\text{C}$  NMR (125 MHz,  $\text{CDCl}_3$ ):  $\delta$  = 144.6, 128.0, 127.2, 126.9, 116.4, 110.5, 51.5, 33.6, 26.0, 25.0, 23.9, 12.8. MS (EI)  $m/z$ : 203, 188, 174, 160, 147, 132, 118, 106, 91, 77, 55.

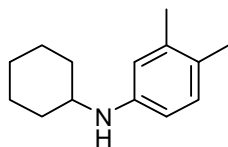

**N-cyclohexyl-4-methylaniline (3f)**

$^1\text{H}$  NMR (500 MHz,  $\text{CDCl}_3$ ):  $\delta$  = 6.93 (d,  $J$  = 8.0 Hz, 1H), 6.44 (d,  $J$  = 2.5 Hz, 1H), 6.39 (dd,  $J$  = 8.0, 2.5 Hz, 1H), 3.26-3.20 (m, 1H), 2.20 (s, 3H), 2.16 (s, 3H), 2.07-2.04 (m, 2H), 1.78-1.74 (m, 2H), 1.67-1.64 (m, 1H), 1.42-1.33 (m, 2H), 1.27-1.21 (m, 1H), 1.20-1.10 (m, 2H).  $^{13}\text{C}$  NMR (125 MHz,  $\text{CDCl}_3$ ):  $\delta$  = 145.5, 137.2, 130.3, 124.9, 115.2, 110.7, 52.0, 33.6, 26.0, 25.0, 20.0, 18.6. MS (EI)  $m/z$ : 203, 160, 145, 120, 106, 91, 77, 55.

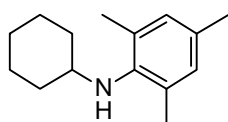

**N-cyclohexyl-2,4,6-trimethylaniline (3g)**

$^1\text{H}$  NMR (500 MHz,  $\text{CDCl}_3$ ):  $\delta$  = 6.80 (s, 2H), 2.91-2.85 (m, 1H), 2.23 (s, 3H), 2.22 (s, 3H), 1.97-1.94 (m, 2H), 1.75-1.72 (m, 2H), 1.63-1.60 (m, 1H), 1.29-1.20 (m, 3H), 1.15-1.07 (m, 2H).  $^{13}\text{C}$  NMR (125 MHz,  $\text{CDCl}_3$ ):  $\delta$  = 142.4, 130.4, 129.3, 129.2, 56.5, 34.9, 26.0, 25.6, 20.5, 18.9. MS (EI)  $m/z$ : 217, 174, 158, 146, 134, 120, 91, 77, 65, 55.

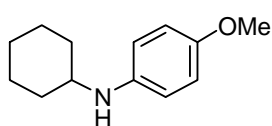

**N-cyclohexyl-4-methoxyaniline (3h)**

$^1\text{H}$  NMR (500 MHz,  $\text{CDCl}_3$ ):  $\delta$  = 6.78-6.76 (m, 2H), 6.59-6.57 (m, 2H), 3.74 (s, 3H), 3.19-3.14 (m, 1H), 3.10 (s, 1H), 2.06-2.03 (m, 2H), 1.77-1.73 (m, 2H), 1.66-1.63 (m, 1H), 1.40-1.31 (m, 2H), 1.25-1.20 (m, 1H), 1.16-1.08 (m, 2H).  $^{13}\text{C}$  NMR (125 MHz,  $\text{CDCl}_3$ ):  $\delta$  = 151.9, 141.5, 114.9, 114.8, 55.8, 52.8, 33.6, 26.0, 25.0. MS (EI)  $m/z$ : 205, 162, 134, 108, 92, 77, 55.

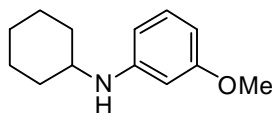

**N-cyclohexyl-3-methoxyaniline (3i)**

$^1\text{H}$  NMR (500 MHz,  $\text{CDCl}_3$ ):  $\delta$  = 7.06 (t,  $J$  = 8.0 Hz, 1H), 6.25-6.20 (m, 2H), 6.16-6.15 (m, 1H), 3.77 (s, 3H), 3.26-3.21 (m, 1H), 2.08-2.05 (m, 2H), 1.78-1.74 (m, 2H), 1.67-1.63 (m, 1H), 1.41-1.32 (m, 2H), 1.27-1.11 (m, 3H).  $^{13}\text{C}$  NMR (125 MHz,  $\text{CDCl}_3$ ):  $\delta$  = 160.8, 148.7, 129.9, 106.4, 101.8, 99.1, 55.0, 51.7, 33.4, 25.9, 25.0. MS (EI)  $m/z$ : 205, 162, 148, 123, 107, 92, 77, 55.

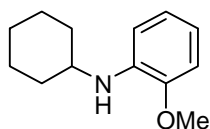

**N-cyclohexyl-2-methoxyaniline (3j)**

$^1\text{H}$  NMR (500 MHz,  $\text{CDCl}_3$ ):  $\delta$  = 6.85 (t,  $J$  = 7.5 Hz, 1H), 6.77 (d,  $J$  = 8.0 Hz, 1H), 6.63 (t,  $J$  = 7.5 Hz, 2H), 4.16 (s, 1H), 3.84 (s, 3H), 3.29-3.23 (m, 1H), 2.09-2.06 (m, 2H), 1.80-1.76 (m, 2H), 1.67-1.64 (m, 1H), 1.43-1.34 (m, 2H), 1.29-1.18 (m, 3H).  $^{13}\text{C}$  NMR (125 MHz,  $\text{CDCl}_3$ ):  $\delta$  = 146.7, 137.2, 121.2, 115.7, 110.2, 109.5, 55.3, 51.3, 33.4, 26.0, 25.1. MS (EI)  $m/z$ : 205, 190, 176, 162, 134, 120, 108, 80, 55.

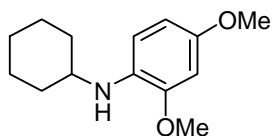

**N-cyclohexyl-2,4-dimethoxyaniline (3k)**

$^1\text{H NMR}$  (500 MHz,  $\text{CDCl}_3$ ):  $\delta$  = 6.55 (d,  $J$  = 8.5 Hz, 1H), 6.45 (d,  $J$  = 3.0 Hz, 1H), 6.40 (dd,  $J$  = 8.5, 3.0 Hz, 1H), 3.81 (s, 3H), 3.75 (s, 3H), 3.20-3.15 (m, 1H), 2.07-2.04 (m, 2H), 1.78-1.74 (m, 2H), 1.66-1.62 (m, 1H), 1.40-1.31 (m, 2H), 1.26-1.13 (m, 3H).  $^{13}\text{C NMR}$  (125 MHz,  $\text{CDCl}_3$ ):  $\delta$  = 151.5, 148.0, 131.5, 111.0, 103.9, 99.2, 55.8, 55.4, 52.2, 33.5, 26.0, 25.1. MS (EI)  $m/z$ : 235, 220, 192, 164, 138, 110, 95, 79, 55.

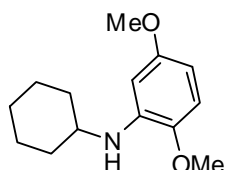

**N-cyclohexyl-2,5-dimethoxyaniline (3l)**

$^1\text{H NMR}$  (500 MHz,  $\text{CDCl}_3$ ):  $\delta$  = 6.65 (d,  $J$  = 8.5 Hz, 1H), 6.23 (d,  $J$  = 2.5 Hz, 1H), 6.12-6.10 (m, 1H), 4.20 (s, 1H), 3.79 (s, 3H), 3.75 (s, 3H), 3.24-3.18 (m, 1H), 2.08-2.05 (m, 2H), 1.78-1.74 (m, 2H), 1.67-1.63 (m, 1H), 1.41-1.32 (m, 2H), 1.27-1.16 (m, 3H).  $^{13}\text{C NMR}$  (125 MHz,  $\text{CDCl}_3$ ):  $\delta$  = 154.8, 141.5, 138.3, 109.9, 98.4, 97.8, 55.9, 55.5, 51.3, 33.3, 25.9, 25.0. MS (EI)  $m/z$ : 235, 220, 192, 164, 138, 110, 79, 55.

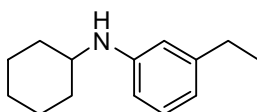

**N-cyclohexyl-3-ethylaniline (3m)**

$^1\text{H NMR}$  (500 MHz,  $\text{CDCl}_3$ ):  $\delta$  = 7.08 (t,  $J$  = 7.5 Hz, 1H), 6.53 (d,  $J$  = 7.5 Hz, 1H), 6.41 (d,  $J$  = 8.0 Hz, 2H), 3.28-3.23 (m, 1H), 2.57 (q,  $J$  = 7.5 Hz, 2H), 2.07-2.04 (m, 2H), 1.78-1.74 (m, 2H), 1.67-1.63 (m, 1H), 1.42-1.33 (m, 2H), 1.27-1.12 (m, 3H), 1.22 (t,  $J$  = 7.5 Hz, 3H).  $^{13}\text{C NMR}$  (125 MHz,  $\text{CDCl}_3$ ):  $\delta$  = 147.3, 145.4, 129.1, 116.6, 112.9, 110.4, 51.7, 33.5, 29.0, 25.9, 25.0, 15.5. MS (EI)  $m/z$ : 203, 174, 160, 147, 130, 118, 106, 147, 130, 118, 106, 91, 77, 65, 55.

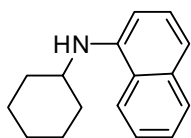

**N-cyclohexyl-1-naphthalenamine (3n)**

$^1\text{H NMR}$  (500 MHz,  $\text{CDCl}_3$ ):  $\delta$  = 7.81-7.78 (m, 2H), 7.47-7.41 (m, 2H), 7.35 (t,  $J$  = 8.0 Hz, 1H), 7.21 (d,  $J$  = 8.0 Hz, 1H), 6.66 (d,  $J$  = 8.0 Hz, 1H), 4.28 (s, 1H), 3.52-3.46 (m, 1H), 2.22-2.19 (m, 2H), 1.86-1.82 (m, 2H), 1.74-1.70 (m, 1H), 1.51-1.42 (m, 2H), 1.37-1.28 (m, 3H).  $^{13}\text{C NMR}$  (125 MHz,  $\text{CDCl}_3$ ):  $\delta$  = 142.3, 134.5, 128.7, 126.6, 125.5, 124.4, 123.4, 119.8, 116.6, 104.7, 51.8, 33.3, 26.0, 25.0. MS (EI)  $m/z$ : 225, 182, 168, 143, 127, 115, 77, 55.

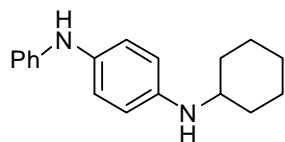

**N<sup>1</sup>-cyclohexyl-N<sup>4</sup>-phenylbenzene-1,4-diamine (3o)**

$^1\text{H NMR}$  (500 MHz,  $\text{CDCl}_3$ ):  $\delta$  = 7.18 (t,  $J$  = 7.0 Hz, 2H), 6.99 (s, 2H), 6.84-6.77 (m, 3H), 6.59 (s, 2H), 5.36 (s, 1H), 3.23 (s, 2H), 2.08 (d,  $J$  = 10.0 Hz, 2H), 1.79-1.76 (m, 2H), 1.68-1.65 (m, 1H), 1.42-1.34 (m, 2H), 1.27-1.23 (m, 1H), 1.20-1.13 (m, 2H).  $^{13}\text{C NMR}$  (125 MHz,  $\text{CDCl}_3$ ):  $\delta$  = 146.4, 143.6, 132.2, 129.2, 124.0, 118.6, 114.7, 114.2, 52.3, 33.6, 25.9, 25.0. MS (EI)  $m/z$ : 266, 253, 223, 183, 167, 147, 133, 96, 73, 55.

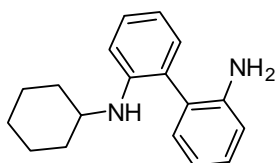

**N<sup>2</sup>-cyclohexyl-[1,1'-biphenyl]-2,2'-diamine (3p)**

$^1\text{H NMR}$  (500 MHz,  $\text{CDCl}_3$ ):  $\delta$  = 7.25-7.22 (m, 1H), 7.20-7.17 (m, 1H), 7.11-7.08 (m, 2H), 6.85-6.82 (m, 1H), 6.79-6.73 (m, 3H), 3.70 (s, 2H), 3.31-3.26 (m, 1H), 2.02 (d,  $J$  = 12.0 Hz, 1H), 1.96 (d,  $J$  = 12.0

Hz, 1H), 1.71-1.66 (m, 2H), 1.62-1.58 (m, 1H), 1.38-1.30 (m, 2H), 1.21-1.02 (m, 3H).  $^{13}\text{C}$  NMR (125 MHz,  $\text{CDCl}_3$ ):  $\delta$  = 144.6, 144.3, 131.2, 131.0, 128.8, 128.7, 124.5, 124.3, 118.7, 116.7, 115.5, 111.4, 51.7, 33.2, 25.9, 24.9. MS (EI)  $m/z$ : 266, 223, 208, 195, 183, 167, 111, 98, 83, 67, 55.

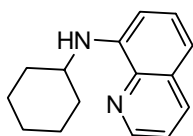

**N-cyclohexylquinolin-8-amine (3q)**

$^1\text{H}$  NMR (500 MHz,  $\text{CDCl}_3$ ):  $\delta$  = 8.70-8.69 (m, 1H), 8.04 (d,  $J$  = 8.0 Hz, 1H), 7.37-7.33 (m, 2H), 7.00 (d,  $J$  = 8.0 Hz, 1H), 6.69 (d,  $J$  = 7.5 Hz, 1H), 6.14 (s, 1H), 3.48-3.45 (m, 1H), 2.18-2.16 (m, 2H), 1.85-1.82 (m, 2H), 1.70-1.67 (m, 1H), 1.48-1.26 (m, 6H).  $^{13}\text{C}$  NMR (125 MHz,  $\text{CDCl}_3$ ):  $\delta$  = 146.5, 143.7, 136.0, 132.2, 128.9, 127.8, 121.2, 113.0, 104.8, 51.2, 33.0, 26.0, 25.1. MS (EI)  $m/z$ : 226, 197, 183, 169, 156, 144, 129, 117, 102, 89, 77, 55.

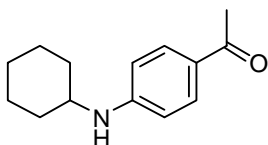

**1-(4-(cyclohexylamino)phenyl)ethanone (3r)**

$^1\text{H}$  NMR (500 MHz,  $\text{CDCl}_3$ ):  $\delta$  = 7.80 (d,  $J$  = 9.0 Hz, 2H), 6.53 (d,  $J$  = 9.0 Hz, 2H), 4.16 (s, 1H), 3.37-3.31 (m, 1H), 2.48 (s, 3H), 2.06-2.03 (m, 2H), 1.79-1.75 (m, 2H), 1.68-1.64 (s, 1H), 1.42-1.34 (m, 2H), 1.27-1.15 (m, 3H).  $^{13}\text{C}$  NMR (125 MHz,  $\text{CDCl}_3$ ):  $\delta$  = 196.1, 151.0, 130.8, 126.3, 111.7, 51.4, 33.0, 25.9, 25.7, 24.8. MS (EI)  $m/z$ : 217, 202, 174, 146, 132, 120, 106, 91, 77, 65, 55.

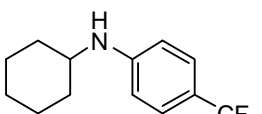

**N-cyclohexyl-4-(trifluoromethyl)aniline (3s)**

$^1\text{H}$  NMR (500 MHz,  $\text{CDCl}_3$ ):  $\delta$  = 7.37 (d,  $J$  = 8.5 Hz, 2H), 6.56 (d,  $J$  = 8.5 Hz, 2H), 3.88 (s, 1H), 3.31-3.27 (m, 1H), 2.06-2.03 (m, 2H), 1.79-1.75 (m, 2H), 1.68-1.64 (m, 1H), 1.43-1.34 (m, 2H), 1.27-1.16 (m, 3H).  $^{13}\text{C}$  NMR (125 MHz,  $\text{CDCl}_3$ ):  $\delta$  = 149.7, 144.8, 126.6, 126.6, 126.6, 126.5, 126.1, 123.9, 121.8, 118.2, 117.9, 111.9, 51.3, 33.1, 25.7, 24.8. MS (EI)  $m/z$ : 243, 224, 214, 220, 186, 174, 161, 145, 130, 118, 91, 55.

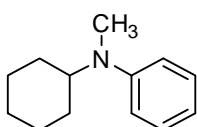

**N-cyclohexyl-N-methylaniline (3t)**

$^1\text{H}$  NMR (500 MHz,  $\text{CDCl}_3$ ):  $\delta$  = 7.22 (t,  $J$  = 7.5 Hz, 2H), 6.78 (d,  $J$  = 8.0 Hz, 2H), 6.68 (t,  $J$  = 7.5 Hz, 1H), 3.59-3.54 (m, 1H), 2.78 (s, 3H), 1.86-1.78 (m, 4H), 1.69 (t,  $J$  = 6.5 Hz, 1H), 1.50-1.42 (m, 2H), 1.40-1.32 (m, 2H), 1.18-1.09 (m, 1H).  $^{13}\text{C}$  NMR (125 MHz,  $\text{CDCl}_3$ ): 150.1, 129.1, 116.2, 113.1, 58.1, 31.1, 30.0, 26.2, 25.9. MS (EI)  $m/z$ : 189, 146, 132, 120, 106, 91, 77, 55.

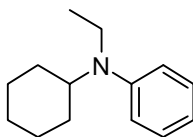

**N-cyclohexyl-N-ethylaniline (3u)**

$^1\text{H}$  NMR (500 MHz,  $\text{CDCl}_3$ ):  $\delta$  = 7.20 (t,  $J$  = 7.0 Hz, 2H), 6.73 (d,  $J$  = 7.5 Hz, 2H), 6.63 (t,  $J$  = 7.0 Hz, 1H), 3.54 (t,  $J$  = 10.0 Hz, 1H), 3.28 (q,  $J$  = 7.0 Hz, 2H), 1.85 (d,  $J$  = 8.0 Hz, 3H), 1.69 (d,  $J$  = 7.5 Hz, 1H), 1.55 (s, 2H), 1.45-1.31 (m, 3H), 1.25 (s, 1H), 1.15 (t,  $J$  = 7.0 Hz, 3H).  $^{13}\text{C}$  NMR (125 MHz,  $\text{CDCl}_3$ ):  $\delta$  = 148.4, 129.1, 115.5, 112.5, 57.1, 38.9, 30.7, 26.3, 26.0, 15.2. MS (EI)  $m/z$ : 203, 188, 174, 160, 146, 132, 119, 104, 91, 77, 55.

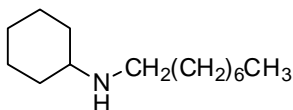

**N-octylcyclohexanamine (3v)**

$^1\text{H}$  NMR (500 MHz,  $\text{CDCl}_3$ ):  $\delta$  = 2.61 (t,  $J$  = 7.5 Hz, 2H), 2.44-2.40



(m, 1H), 1.89 (d,  $J = 10.5$  Hz, 2H), 1.73-1.71 (m, 2H), 1.61 (d,  $J = 9.0$  Hz, 1H), 1.47 (d,  $J = 7.0$  Hz, 2H), 1.28-1.21 (m, 12H), 1.19-1.06 (m, 4H), 0.87 (t,  $J = 7.0$  Hz, 3H).  $^{13}\text{C}$  NMR (125 MHz,  $\text{CDCl}_3$ ):  $\delta = 56.9, 46.9, 33.4, 31.8, 30.2, 29.5, 29.2, 27.4, 26.1, 25.1, 22.6, 14.1$ . MS (EI)  $m/z$ : 211, 182, 168, 140, 112, 98, 83, 70, 55.

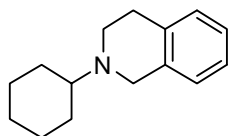

**2-cyclohexyl-1,2,3,4-tetrahydroisoquinoline (3w)**

$^1\text{H}$  NMR (500 MHz,  $\text{CDCl}_3$ ):  $\delta = 7.11-7.07$  (m, 3H), 7.02-7.01 (m, 1H), 3.80 (s, 2H), 2.89 (t,  $J = 5.0$  Hz, 2H), 2.85 (t,  $J = 5.0$  Hz, 2H), 2.51-2.46 (m, 1H), 1.97 (d,  $J = 11.0$  Hz, 2H), 1.84 (d,  $J = 12.5$  Hz, 2H), 1.66 (d,  $J = 12.5$  Hz, 1H), 1.38-1.24 (m, 4H), 1.19-1.11 (m, 1H).  $^{13}\text{C}$  NMR (125 MHz,  $\text{CDCl}_3$ ):  $\delta = 135.3, 134.6, 128.6, 126.7, 125.9, 125.4, 63.1, 51.7, 46.7, 29.6, 28.8, 26.3, 25.9$ . MS (EI)  $m/z$ : 215, 172, 158, 146, 132, 117, 104, 91, 77, 65, 55.

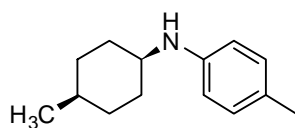

**4-methyl-N-(4-methylcyclohexyl)aniline (4a)**

$^1\text{H}$  NMR (500 MHz,  $\text{CDCl}_3$ ):  $\delta = 6.99$  (d,  $J = 8.0$  Hz, 2H), 6.55 (d,  $J = 8.5$  Hz, 2H), 3.53 (t,  $J = 4.0$  Hz, 1H), 2.24 (s, 3H), 1.77-1.74 (m, 2H), 1.67-1.61 (m, 2H), 1.57-1.53 (m, 3H), 1.30-1.22 (m, 2H), 0.95 (d,  $J = 6.5$  Hz, 3H).  $^{13}\text{C}$  NMR (125 MHz,  $\text{CDCl}_3$ ):  $\delta = 145.1, 129.7, 125.9, 113.4, 48.4, 30.9, 29.8, 29.3, 21.3, 20.3$ . MS (EI)  $m/z$ : 203, 146, 133, 120, 107, 91, 77, 55.

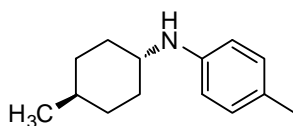

$^1\text{H}$  NMR (500 MHz,  $\text{CDCl}_3$ ):  $\delta = 6.96$  (d,  $J = 8.5$  Hz, 2H), 6.51 (d,  $J = 8.5$  Hz, 2H), 3.16-3.11 (m, 1H), 2.22 (s, 3H), 2.10 (d,  $J = 5.5$  Hz, 2H), 1.74 (t,  $J = 6.0$  Hz, 2H), 1.41-1.35 (m, 1H), 1.13-1.01 (m, 4H), 0.91 (d,  $J = 6.5$  Hz, 3H).  $^{13}\text{C}$  NMR (125 MHz,  $\text{CDCl}_3$ ):  $\delta = 145.2, 129.7, 126.1, 113.5, 52.4, 34.1, 33.6, 32.3, 22.2, 20.3$ . MS (EI)  $m/z$ : 203, 146, 133, 120, 107, 91, 77, 55.

**4-methyl-N-(3-methylcyclohexyl)aniline (4b)**

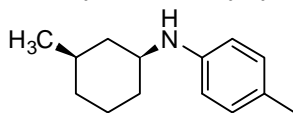

$^1\text{H}$  NMR (500 MHz,  $\text{CDCl}_3$ ):  $\delta = 6.98$  (d,  $J = 8.5$  Hz, 2H), 6.54 (d,  $J = 8.5$  Hz, 2H), 3.65 (t,  $J = 4.0$  Hz, 1H), 2.23 (s, 3H), 1.75-1.72 (m, 2H), 1.66-1.64 (m, 2H), 1.58-1.52 (m, 3H), 1.37-1.32 (m, 1H), 1.08-1.01 (m, 1H), 0.92 (d,  $J = 6.5$  Hz, 3H).  $^{13}\text{C}$  NMR (125 MHz,  $\text{CDCl}_3$ ):  $\delta = 145.0, 129.7, 126.0, 113.3, 47.9, 38.8, 34.0, 30.4, 27.1, 21.7, 20.5, 20.3$ . MS (EI)  $m/z$ : 203, 188, 160, 146, 133, 120, 107, 91, 77, 55.

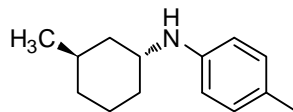

$^1\text{H}$  NMR (500 MHz,  $\text{CDCl}_3$ ):  $\delta = 6.97$  (d,  $J = 8.5$  Hz, 2H), 6.54 (d,  $J = 8.5$  Hz, 2H), 3.22-3.18 (m, 1H), 2.23 (s, 3H), 2.11-2.07 (m, 2H), 1.80-1.75 (m, 1H), 1.68 (d,  $J = 13.0$  Hz, 1H), 1.53-1.46 (m, 1H), 1.40-1.31 (m, 1H), 1.00-0.95 (m, 1H), 0.92 (d,  $J = 6.5$  Hz, 3H), 0.89-0.80 (m, 1H), 0.76-0.69 (m, 1H).  $^{13}\text{C}$  NMR (125 MHz,  $\text{CDCl}_3$ ):  $\delta = 144.9, 129.7, 126.3, 113.7, 52.6, 42.5, 34.6, 33.3, 32.0, 25.0, 22.5, 20.3$ . MS (EI)  $m/z$ : 203, 188, 160, 146, 133, 120, 107, 91, 77, 55.

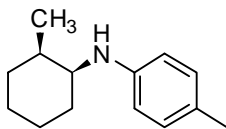

**4-methyl-*N*-(2-methylcyclohexyl)aniline (4c)**

$^1\text{H}$  NMR (500 MHz,  $\text{CDCl}_3$ ):  $\delta$  = 6.97 (d,  $J$  = 8.5 Hz, 2H), 6.54 (d,  $J$  = 8.5 Hz, 2H), 3.47-3.44 (m, 1H), 2.22 (s, 3H), 2.03-1.99 (m, 1H), 1.67-1.63 (m, 1H), 1.57-1.52 (m, 4H), 1.42-1.34 (m, 3H), 0.91 (d,  $J$  = 7.0 Hz, 3H).  $^{13}\text{C}$  NMR (125 MHz,  $\text{CDCl}_3$ ):  $\delta$  = 145.4, 129.7, 125.8, 113.4, 53.5, 33.1, 30.4, 28.6, 22.9, 20.3, 15.4. MS (EI)  $m/z$ : 203, 160, 146, 133, 120, 107, 91, 77, 65, 53.

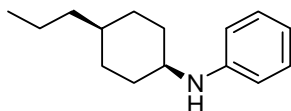

***N*-(4-propylcyclohexyl)aniline (4d)**

$^1\text{H}$  NMR (500 MHz,  $\text{CDCl}_3$ ):  $\delta$  = 7.18-7.15 (m, 2H), 6.67 (t,  $J$  = 7.5 Hz, 1H), 6.61 (d,  $J$  = 8.0 Hz, 2H), 3.58-3.55 (m, 1H), 1.76-1.73 (m, 2H), 1.67-1.55 (m, 4H), 1.42-1.38 (m, 1H), 1.35-1.22 (m, 6H), 0.91 (t,  $J$  = 7.5 Hz, 3H).  $^{13}\text{C}$  NMR (125 MHz,  $\text{CDCl}_3$ ):  $\delta$  = 147.3, 129.2, 116.8, 113.2, 48.5, 37.9, 35.6, 29.3, 27.8, 20.1, 14.3. MS (EI)  $m/z$ : 217, 132, 118, 106, 93, 77, 67, 55.

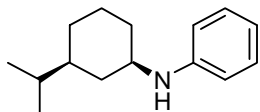

***N*-(3-isopropylcyclohexyl)aniline (4e)**

$^1\text{H}$  NMR (500 MHz,  $\text{CDCl}_3$ ):  $\delta$  = 7.16 (t,  $J$  = 8.0 Hz, 2H), 6.67 (t,  $J$  = 7.5 Hz, 1H), 6.62 (d,  $J$  = 8.0 Hz, 2H), 3.73 (t,  $J$  = 3.5 Hz, 1H), 1.77 (d,  $J$  = 11.5 Hz, 2H), 1.68-1.65 (m, 1H), 1.60-1.41 (m, 5H), 1.37-1.31 (m, 1H), 1.15-1.08 (m, 1H), 0.88-0.85 (m, 6H).  $^{13}\text{C}$  NMR (125 MHz,  $\text{CDCl}_3$ ):  $\delta$  = 147.3, 129.2, 116.8, 113.20, 47.8, 38.3, 34.1, 31.8, 30.2, 28.8, 20.8, 20.1, 19.6. MS (EI)  $m/z$ : 217, 174, 132, 118, 106, 93, 77, 67, 55.

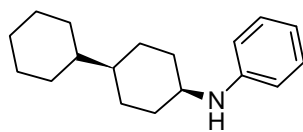

***N*-phenyl-[1,1'-bi(cyclohexan)]-4-amine (4f)**

$^1\text{H}$  NMR (500 MHz,  $\text{CDCl}_3$ ):  $\delta$  = 7.17-7.14 (m, 2H), 6.66 (t,  $J$  = 7.5 Hz, 1H), 6.61 (d,  $J$  = 8.0 Hz, 2H), 3.60 (t,  $J$  = 4.0 Hz, 1H), 1.83-1.79 (m, 2H), 1.73 (d,  $J$  = 10.5 Hz, 4H), 1.66-1.51 (m, 5H), 1.36-1.29 (m, 2H), 1.26-1.11 (m, 5H), 0.97-0.90 (m, 2H).  $^{13}\text{C}$  NMR (125 MHz,  $\text{CDCl}_3$ ):  $\delta$  = 147.0, 129.2, 116.8, 113.2, 48.1, 42.1, 41.7, 30.3, 29.7, 26.7, 26.7, 24.6. MS (EI)  $m/z$ : 257, 186, 132, 118, 106, 93, 81, 67, 55.

***N*-(4-*tert*-butyl)cyclohexyl)-4-methylaniline (4g)**

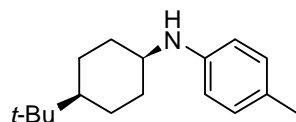

$^1\text{H}$  NMR (500 MHz,  $\text{CDCl}_3$ ):  $\delta$  = 6.90 (d,  $J$  = 8.5 Hz, 2H), 6.56 (d,  $J$  = 8.5 Hz, 2H), 3.65 (t,  $J$  = 3.0 Hz, 1H), 2.25 (s, 3H), 1.99 (d,  $J$  = 14.0 Hz, 2H), 1.61-1.55 (m, 2H), 1.53-1.49 (m, 2H), 1.25-1.17 (m, 2H), 1.08-1.05 (m, 1H), 0.88 (s, 9H).  $^{13}\text{C}$  NMR (125 MHz,  $\text{CDCl}_3$ ):  $\delta$  = 145.1, 129.7, 125.9, 113.4, 47.9, 47.0, 32.5, 30.3, 27.5, 21.5, 20.3. MS (EI)  $m/z$ : 245, 188, 172, 146, 131, 107, 91, 72, 57.

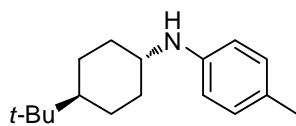

$^1\text{H}$  NMR (500 MHz,  $\text{CDCl}_3$ ):  $\delta$  = 6.97 (d,  $J$  = 8.5 Hz, 2H), 6.53 (d,  $J$  = 8.5 Hz, 2H), 3.15 (m, 1H), 2.23 (s, 3H), 2.17 (d,  $J$  = 11.5 Hz, 2H), 1.83 (d,  $J$  = 12.5 Hz, 2H), 1.14-1.02 (m, 5H), 0.88 (s, 9H).  $^{13}\text{C}$  NMR (125 MHz,  $\text{CDCl}_3$ ):  $\delta$  = 145.1, 129.7, 126.1, 113.5, 52.8, 47.7, 34.0, 32.4, 27.6, 26.3, 20.3. MS (EI)  $m/z$ : 245, 188, 172, 146, 131, 107, 91, 72, 57.

***N*-(4-methoxycyclohexyl)-4-methylaniline (4h)**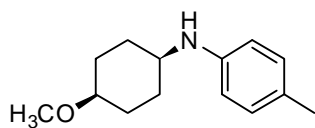

$^1\text{H NMR}$  (500 MHz,  $\text{CDCl}_3$ ):  $\delta$  = 6.97 (d,  $J$  = 8.5 Hz, 2H), 6.53 (d,  $J$  = 8.5 Hz, 2H), 3.38-3.36 (m, 1H), 3.34 (s, 1H), 3.32 (s, 3H), 2.23 (s, 3H), 1.86-1.75 (m, 4H), 1.59 (t,  $J$  = 9.5 Hz, 4H).  $^{13}\text{C NMR}$  (125 MHz,  $\text{CDCl}_3$ ):  $\delta$  = 144.8, 129.7, 126.3, 113.6, 75.3, 55.6, 50.5, 27.9, 27.7, 20.3. MS (EI)  $m/z$ : 219, 146, 131, 106, 91, 77, 65, 53.

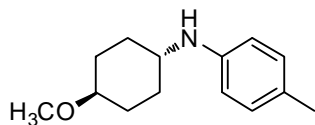

$^1\text{H NMR}$  (500 MHz,  $\text{CDCl}_3$ ):  $\delta$  = 6.97 (d,  $J$  = 8.5 Hz, 2H), 6.52 (d,  $J$  = 8.5 Hz, 2H), 3.36 (s, 3H), 3.26-3.20 (m, 1H), 3.20-3.15 (m, 1H), 2.24 (s, 3H), 2.15 (d,  $J$  = 12.0 Hz, 2H), 2.08 (t,  $J$  = 6.5 Hz, 2H), 1.38-1.30 (m, 2H), 1.19-1.11 (m, 2H).  $^{13}\text{C NMR}$  (125 MHz,  $\text{CDCl}_3$ ):  $\delta$  = 145.0, 129.7, 126.4, 113.5, 78.7, 55.9, 51.6, 31.0, 30.3, 20.3. MS (EI)  $m/z$ : 219, 146, 131, 106, 91, 77, 65, 53.

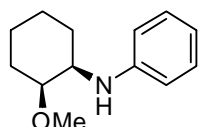***N*-(2-methoxycyclohexyl)aniline (4i)**

$^1\text{H NMR}$  (500 MHz,  $\text{CDCl}_3$ ):  $\delta$  = 7.17-7.14 (m, 2H), 6.67 (t,  $J$  = 7.5 Hz, 1H), 6.62 (d,  $J$  = 8.0 Hz, 2H), 4.17 (s, 1H), 3.51 (t,  $J$  = 2.0 Hz, 1H), 3.41-3.38 (m, 1H), 3.33 (s, 3H), 2.06-2.02 (m, 1H), 1.77-1.68 (m, 2H), 1.59-1.46 (m, 2H), 1.44-1.26 (m, 3H).  $^{13}\text{C NMR}$  (125 MHz,  $\text{CDCl}_3$ ):  $\delta$  = 147.3, 129.2, 117.1, 113.6, 77.6, 56.3, 53.7, 27.4, 27.2, 24.1, 20.1. MS (EI)  $m/z$ : 205, 190, 174, 162, 144, 132, 118, 106, 93, 77, 65, 51.

**3-methoxy-*N*-(4-methylcyclohexyl)aniline (4j)**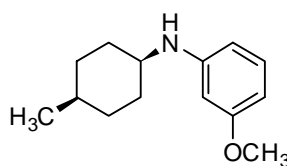

$^1\text{H NMR}$  (500 MHz,  $\text{CDCl}_3$ ):  $\delta$  = 7.06 (t,  $J$  = 8.0 Hz, 1H), 6.24-6.22 (m, 2H), 6.16 (s, 1H), 3.77 (s, 3H), 3.54-3.51 (m, 1H), 1.77-1.73 (m, 2H), 1.66-1.63 (m, 2H), 1.56-1.53 (m, 3H), 1.28-1.20 (m, 2H), 0.93 (d,  $J$  = 6.5 Hz, 3H).  $^{13}\text{C NMR}$  (125 MHz,  $\text{CDCl}_3$ ):  $\delta$  = 160.9, 148.6, 129.9, 106.4, 101.8, 99.0, 55.0, 48.3, 30.8, 29.8, 29.2, 21.3. MS (EI)  $m/z$ : 219, 207, 176, 162, 148, 136, 123, 77, 67, 55.

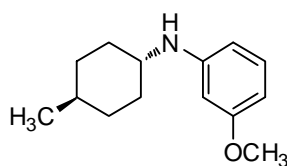

$^1\text{H NMR}$  (500 MHz,  $\text{CDCl}_3$ ):  $\delta$  = 7.05 (t,  $J$  = 8.0 Hz, 1H), 6.25-6.21 (m, 2H), 6.16 (s, 1H), 3.76 (s, 3H), 3.18-3.12 (m, 1H), 2.11 (d,  $J$  = 12.5 Hz, 2H), 1.74 (d,  $J$  = 12.5 Hz, 2H), 1.41-1.34 (m, 1H), 1.16-1.09 (m, 2H), 1.07-1.00 (m, 2H), 0.91 (d,  $J$  = 6.5 Hz, 3H).  $^{13}\text{C NMR}$  (125 MHz,  $\text{CDCl}_3$ ):  $\delta$  = 160.8, 132.7, 129.9, 106.6, 102.1, 99.4, 55.0, 52.4, 34.0, 33.4, 32.3, 22.2. MS (EI)  $m/z$ : 219, 207, 176, 162, 148, 136, 123, 77, 67, 55.

**3-methoxy-*N*-(3-methylcyclohexyl)aniline (4k)**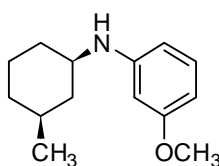

$^1\text{H NMR}$  (500 MHz,  $\text{CDCl}_3$ ):  $\delta$  = 7.06 (t,  $J$  = 8.0 Hz, 1H), 6.24-6.21 (m, 2H), 6.16 (t,  $J$  = 2.0 Hz, 1H), 3.77 (s, 3H), 3.66-3.65 (m, 1H), 1.75-1.73 (m, 2H), 1.70-1.66 (m, 2H), 1.64-1.50 (m, 3H), 1.37-1.32 (m, 1H), 1.08-1.02 (m, 1H), 0.92 (d,  $J$  = 6.5 Hz, 3H).  $^{13}\text{C NMR}$  (125 MHz,  $\text{CDCl}_3$ ):  $\delta$  = 160.9, 148.7, 129.9, 106.3, 101.8, 98.9, 55.0, 47.6, 38.8, 33.9, 30.4, 27.1, 21.7, 20.5. MS (EI)  $m/z$ : 219, 204, 176, 162, 149, 136, 123, 107, 92, 77, 55.

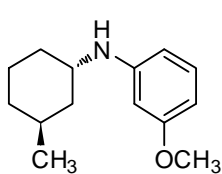

$^1\text{H}$  NMR (500 MHz,  $\text{CDCl}_3$ ):  $\delta$  = 7.05 (t,  $J$  = 8.0 Hz, 1H), 6.23 (t,  $J$  = 9.0 Hz, 2H), 6.16 (s, 1H), 3.76 (s, 3H), 3.24-3.18 (m, 1H), 2.10-2.08 (m, 2H), 1.80-1.76 (m, 1H), 1.68 (d,  $J$  = 12.5 Hz, 1H), 1.50-1.48 (m, 1H), 1.39-1.31 (m, 1H), 1.02-0.96 (m, 1H), 0.91 (d,  $J$  = 6.5 Hz, 3H), 0.86-0.80 (m, 1H), 0.78-0.71 (m, 1H).  $^{13}\text{C}$  NMR (125 MHz,  $\text{CDCl}_3$ ):  $\delta$  = 160.8, 148.4, 129.9, 106.6, 102.0, 99.4, 55.1, 52.3, 42.3, 34.6, 33.2, 32.0, 25.0, 22.4. MS (EI)  $m/z$ : 219, 204, 176, 162, 149, 136, 123, 107, 92, 77, 55.

**methyl 2-(4-(phenylamino)cyclohexyl)acetate (4l)**

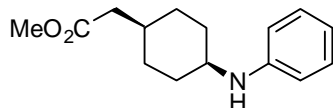

$^1\text{H}$  NMR (500 MHz,  $\text{CDCl}_3$ ):  $\delta$  = 7.16 (t,  $J$  = 7.5 Hz, 2H), 6.67 (t,  $J$  = 7.5 Hz, 1H), 6.60 (d,  $J$  = 8.0 Hz, 2H), 3.67 (s, 3H), 3.57 (t,  $J$  = 4.0 Hz, 1H), 2.29 (d,  $J$  = 7.5 Hz, 2H), 1.98-1.95 (m, 1H), 1.77-1.66 (m, 4H), 1.64-1.59 (m, 2H), 1.39-1.31 (m, 2H).  $^{13}\text{C}$  NMR (125 MHz,  $\text{CDCl}_3$ ):  $\delta$  = 173.3, 147.1, 129.2, 117.0, 113.2, 51.4, 48.0, 40.2, 33.1, 29.1, 27.5. MS (EI)  $m/z$ : 247, 216, 191, 174, 158, 132, 117, 93, 77, 55.

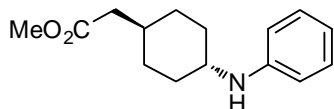

$^1\text{H}$  NMR (500 MHz,  $\text{CDCl}_3$ ):  $\delta$  = 7.17-7.13 (m, 2H), 6.67 (t,  $J$  = 7.5 Hz, 1H), 6.59 (d,  $J$  = 8.0 Hz, 2H), 3.67 (s, 3H), 3.21-3.16 (m, 1H), 2.24 (d,  $J$  = 6.5 Hz, 2H), 2.14 (t,  $J$  = 5.0 Hz, 2H), 1.84-1.81 (m, 3H), 1.18-1.11 (m, 4H).  $^{13}\text{C}$  NMR (125 MHz,  $\text{CDCl}_3$ ):  $\delta$  = 173.3, 147.0, 129.2, 117.2, 113.3, 52.0, 51.4, 41.3, 34.3, 33.1, 31.7. MS (EI)  $m/z$ : 247, 216, 191, 174, 158, 132, 117, 93, 77, 55.

***N*-(3-(trifluoromethyl)cyclohexyl)aniline (4n)**

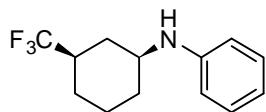

$^1\text{H}$  NMR (500 MHz,  $\text{CDCl}_3$ ):  $\delta$  = 7.20-7.17 (m, 2H), 6.71 (t,  $J$  = 7.5 Hz, 1H), 6.61 (d,  $J$  = 7.5 Hz, 2H), 3.81-3.80 (m, 1H), 2.40-2.32 (m, 1H), 2.07-2.03 (m, 1H), 1.93-1.89 (m, 1H), 1.82-1.80 (m, 1H), 1.74-1.69 (m, 1H), 1.67-1.54 (m, 3H), 1.45-1.37 (m, 1H).  $^{13}\text{C}$  NMR (125 MHz,  $\text{CDCl}_3$ ):  $\delta$  = 146.7, 129.4, 117.5, 113.1, 46.7, 37.0, 36.8, 29.9, 28.8, 24.4, 24.4, 19.4. MS (EI)  $m/z$ : 243, 200, 175, 146, 132, 118, 106, 93, 77, 65, 51.

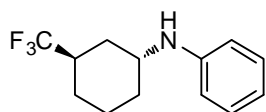

$^1\text{H}$  NMR (500 MHz,  $\text{CDCl}_3$ ):  $\delta$  = 7.17 (t,  $J$  = 7.5 Hz, 2H), 6.71 (t,  $J$  = 8.0 Hz, 1H), 6.60 (d,  $J$  = 7.5 Hz, 2H), 3.32-3.26 (m, 1H), 2.37 (d,  $J$  = 12.5 Hz, 1H), 2.19-2.15 (m, 2H), 1.96-1.93 (m, 2H), 1.45-1.36 (m, 1H), 1.30-1.27 (m, 1H), 1.15-1.05 (m, 2H).  $^{13}\text{C}$  NMR (125 MHz,  $\text{CDCl}_3$ ):  $\delta$  = 146.3, 129.4, 117.7, 113.4, 51.2, 41.4, 41.2, 32.9, 31.9, 29.7, 24.5, 23.7. MS (EI)  $m/z$ : 243, 200, 175, 146, 132, 118, 106, 93, 77, 65, 51.

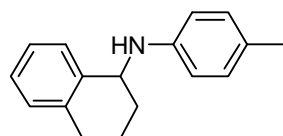

***N*-(*p*-tolyl)-1,2,3,4-tetrahydronaphthalen-1-amine (4n)**  
 $^1\text{H}$  NMR (500 MHz,  $\text{CDCl}_3$ ):  $\delta$  = 7.42-7.40 (m, 1H), 7.21-7.15 (m, 2H), 7.13-7.12 (m, 1H), 7.02 (d,  $J$  = 8.4 Hz, 2H), 4.60 (t,  $J$  = 5.0 Hz, 1H), 3.76 (s, 1H), 2.88-2.74 (m, 2H), 2.27 (s, 3H), 1.99-1.96 (m, 2H), 1.94-1.87 (m, 1H), 1.82-1.78 (m, 1H).  $^{13}\text{C}$  NMR (125 MHz,  $\text{CDCl}_3$ ):  $\delta$  = 145.2, 138.4, 137.6, 129.8, 129.2, 129.0, 127.0, 126.3, 126.0, 113.0, 51.3, 29.3, 28.7, 20.4, 19.4. MS (EI)  $m/z$ : 237, 131,

107, 91, 65, 50.

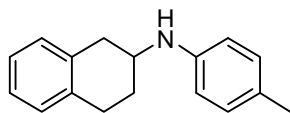

***N*-(*p*-tolyl)-1,2,3,4-tetrahydronaphthalen-2-amine (4o)**

$^1\text{H}$  NMR (500 MHz,  $\text{CDCl}_3$ ):  $\delta$  = 7.15-7.11 (m, 3H), 7.09-7.07 (m, 1H), 7.01 (d,  $J$  = 8.0 Hz, 2H), 6.59 (d,  $J$  = 8.0 Hz, 2H), 3.81-3.76 (m, 1H), 3.24-3.19 (m, 1H), 2.92-2.89 (m, 2H), 2.71-2.66 (m, 1H), 2.25 (s, 3H), 2.20-2.17 (m, 1H), 1.81-1.73 (m, 1H).  $^{13}\text{C}$  NMR (125 MHz,  $\text{CDCl}_3$ ):  $\delta$  = 144.6, 135.9, 134.7, 129.8, 129.5, 128.8, 126.0, 125.8, 119.3, 113.7, 48.9, 36.5, 28.8, 27.5, 20.4. MS (EI)  $m/z$ : 237, 209, 194, 180, 167, 131, 115, 91, 77, 65.

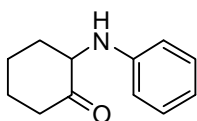

**2-(phenylamino)cyclohexanone (4p)**

$^1\text{H}$  NMR (500 MHz,  $\text{CDCl}_3$ ):  $\delta$  = 7.19-7.16 (m, 2H), 6.70 (t,  $J$  = 7.5 Hz, 1H), 6.61 (d,  $J$  = 7.5 Hz, 2H), 4.88 (s, 1H), 4.02-3.98 (m, 1H), 2.70-2.65 (m, 1H), 2.60-2.57 (m, 1H), 2.46-2.39 (m, 1H), 2.19-2.13 (m, 1H), 1.96-1.91 (m, 1H), 1.87-1.78 (m, 1H), 1.76-1.67 (m, 1H), 1.48-1.40 (m, 1H).  $^{13}\text{C}$  NMR (125 MHz,  $\text{CDCl}_3$ ):  $\delta$  = 208.4, 146.5, 129.3, 117.5, 113.0, 61.8, 41.2, 35.7, 28.1, 24.0. MS (EI)  $m/z$ : 189, 161, 132, 119, 104, 93, 77, 65, 51.

***N*<sup>1</sup>,*N*<sup>4</sup>-diphenylcyclohexane-1,4-diamine (4q)**

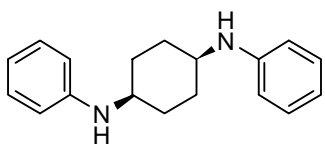

$^1\text{H}$  NMR (500 MHz,  $\text{CDCl}_3$ ):  $\delta$  = 7.18-7.15 (m, 2H), 6.68 (t,  $J$  = 7.5 Hz, 1H), 6.62 (d,  $J$  = 7.5 Hz, 2H), 3.50 (s, 1H), 1.86-1.82 (m, 2H), 1.72-1.66 (m, 2H).  $^{13}\text{C}$  NMR (125 MHz,  $\text{CDCl}_3$ ):  $\delta$  = 147.0, 129.3, 117.2, 113.2, 49.1, 28.4. MS (EI)  $m/z$ : 266, 207, 174, 158, 144, 134, 118, 104, 91, 77, 65, 51.

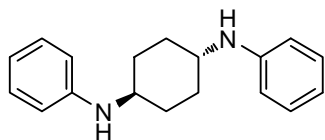

$^1\text{H}$  NMR (500 MHz,  $\text{CDCl}_3$ ):  $\delta$  = 7.18-7.15 (m, 2H), 6.68 (t,  $J$  = 7.5 Hz, 1H), 6.60 (d,  $J$  = 7.5 Hz, 2H), 3.31-3.28 (m, 1H), 2.21 (d,  $J$  = 6.5 Hz, 2H), 1.30-1.26 (m, 2H).  $^{13}\text{C}$  NMR (125 MHz,  $\text{CDCl}_3$ ):  $\delta$  = 147.1, 129.3, 117.2, 113.2, 51.7, 32.2. MS (EI)  $m/z$ : 266, 207, 173, 158, 134, 118, 93, 77, 51.

## E. NMR Spectra

<sup>1</sup>H NMR and <sup>13</sup>C NMR of *N*-cyclohexyl-4-methylaniline (3a)

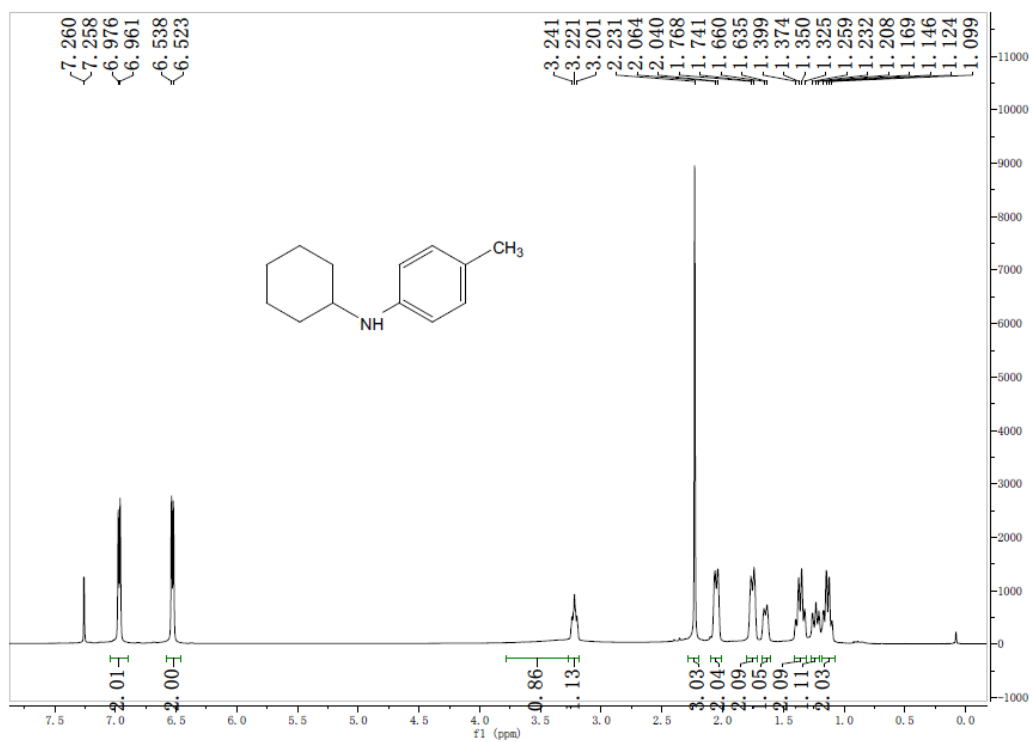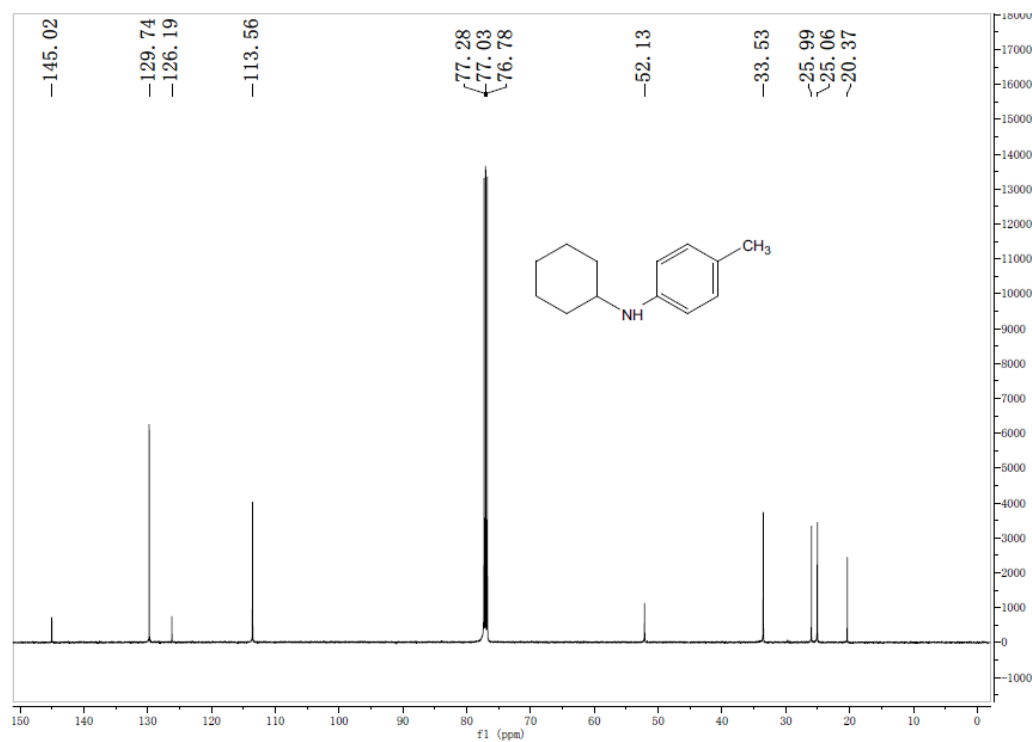

<sup>1</sup>H NMR and <sup>13</sup>C NMR of *N*-cyclohexylaniline (3b)

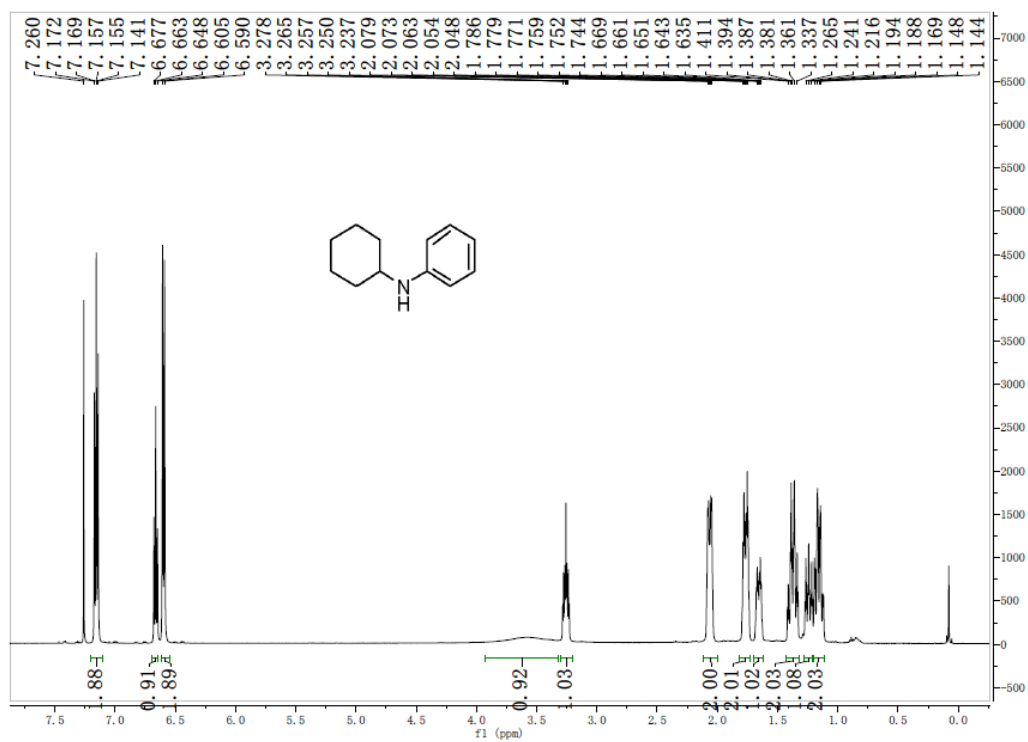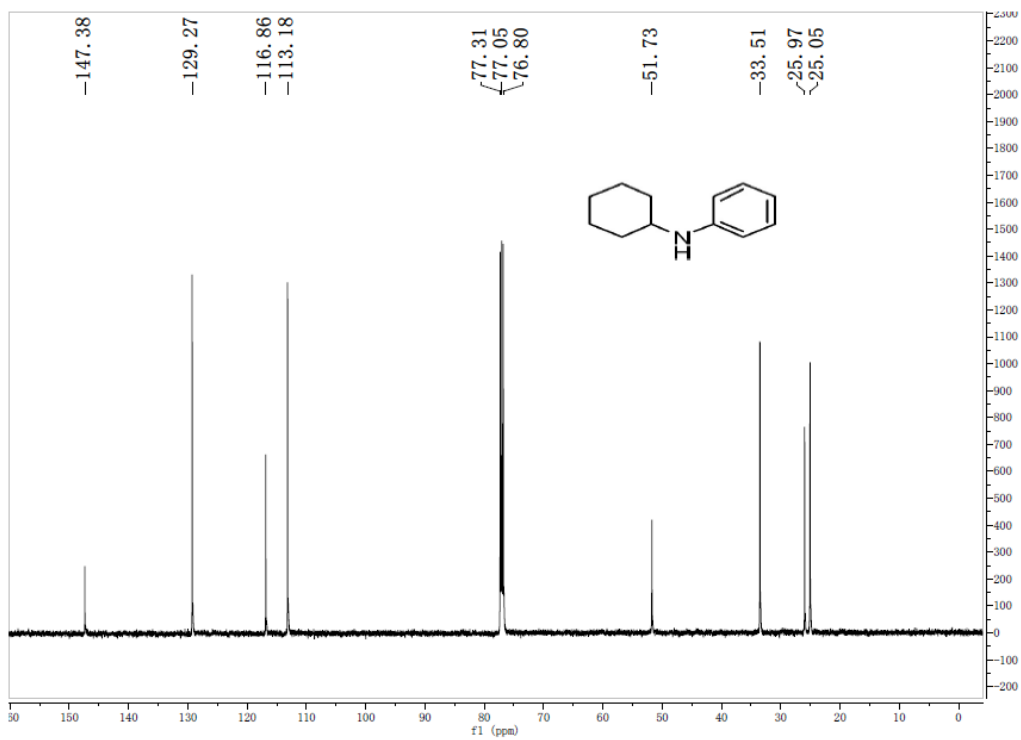

**<sup>1</sup>H NMR and <sup>13</sup>C NMR of *N*-cyclohexyl-3-methylaniline (3c)**

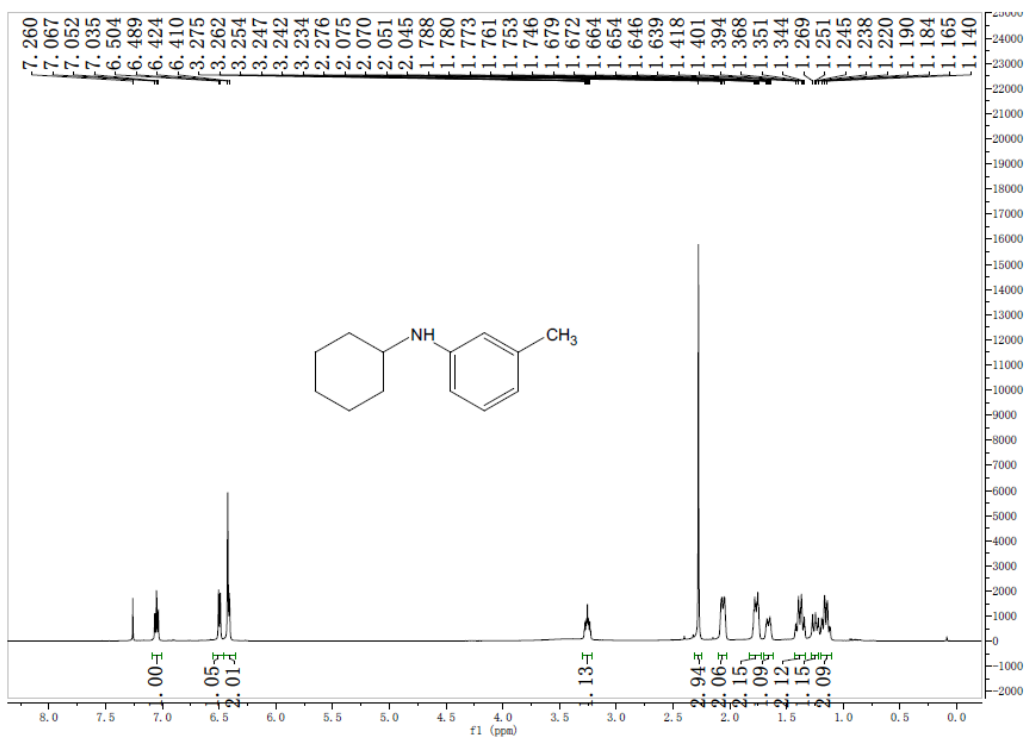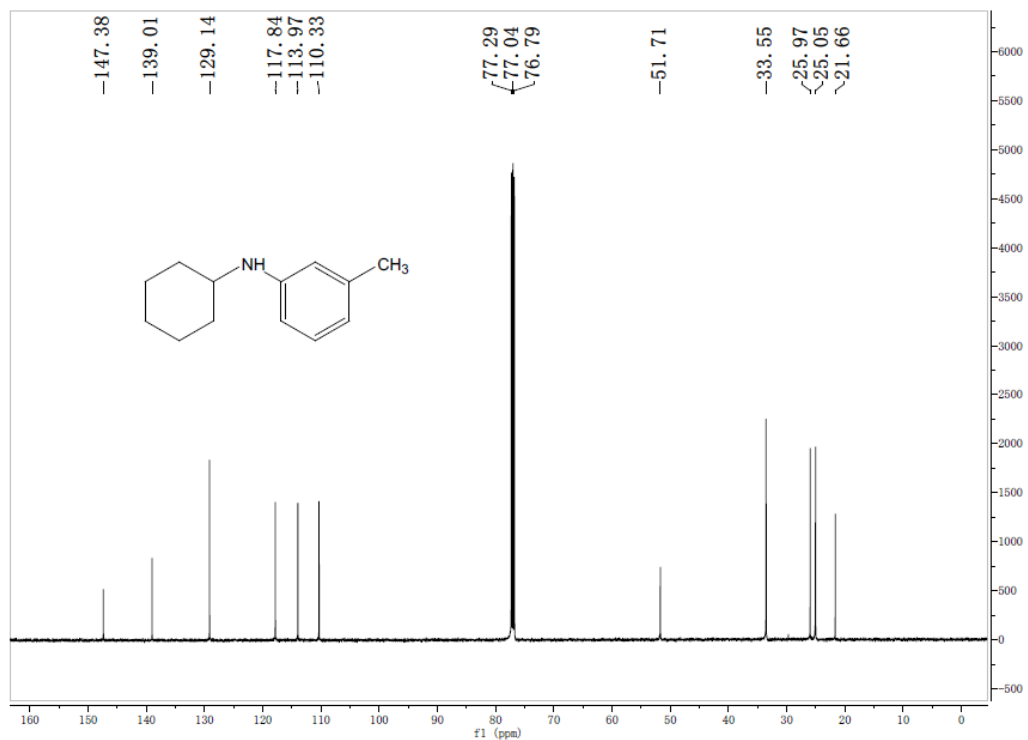



<sup>1</sup>H NMR and <sup>13</sup>C NMR of *N*-cyclohexyl-2-methylaniline (3d)

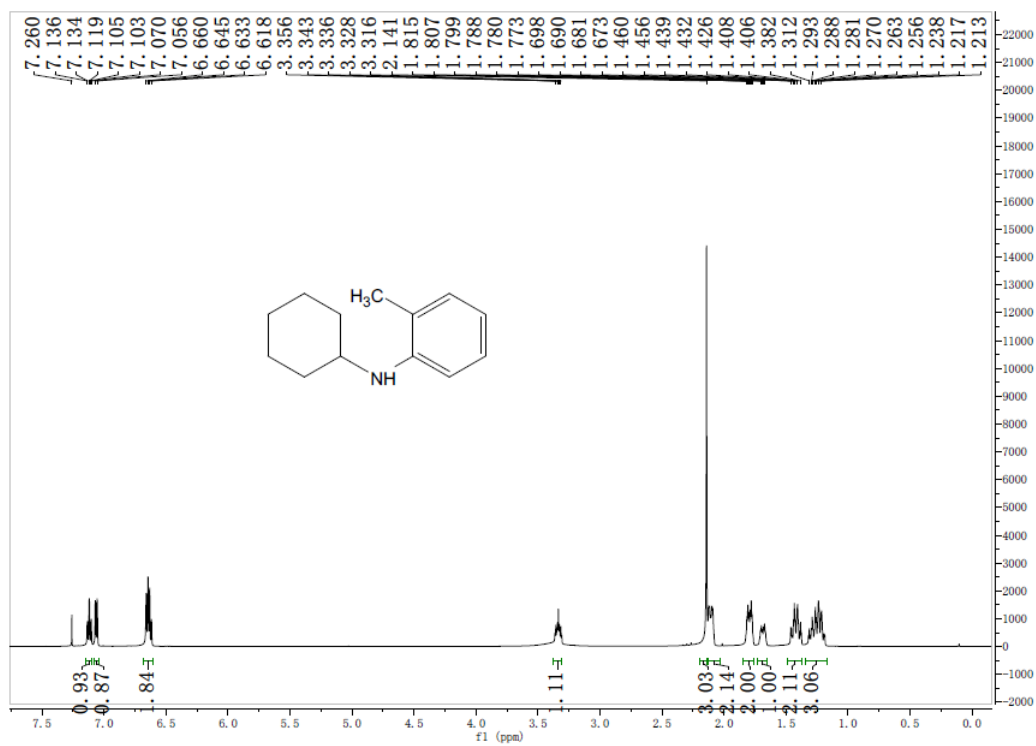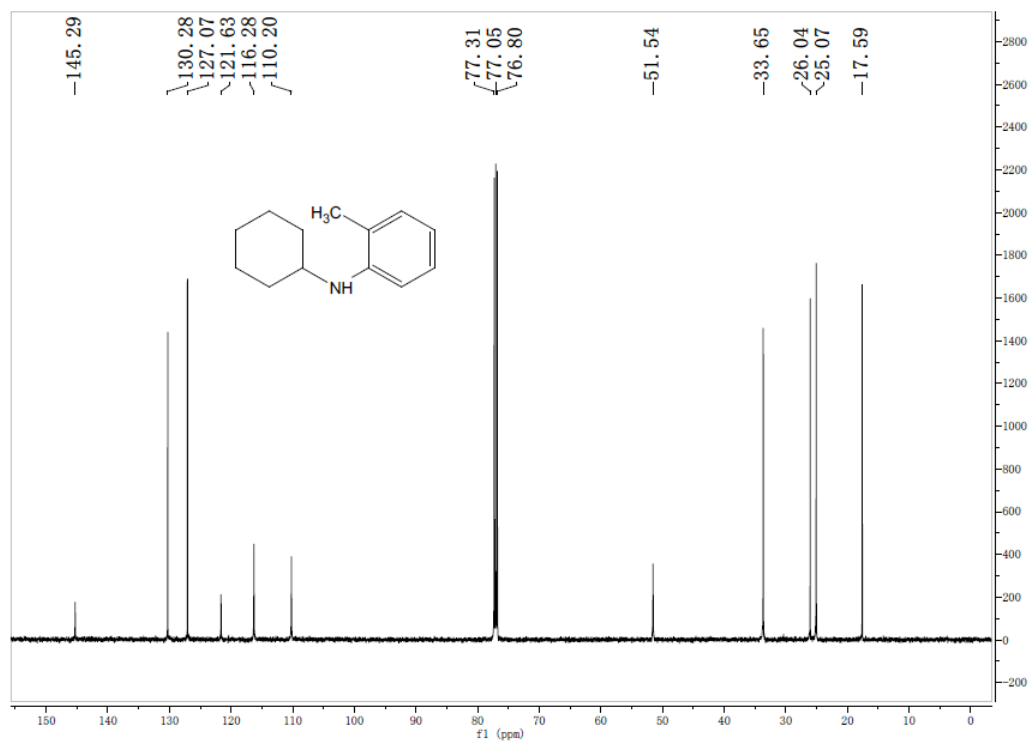

**<sup>1</sup>H NMR and <sup>13</sup>C NMR of *N*-cyclohexyl-2-ethylaniline (3e)**

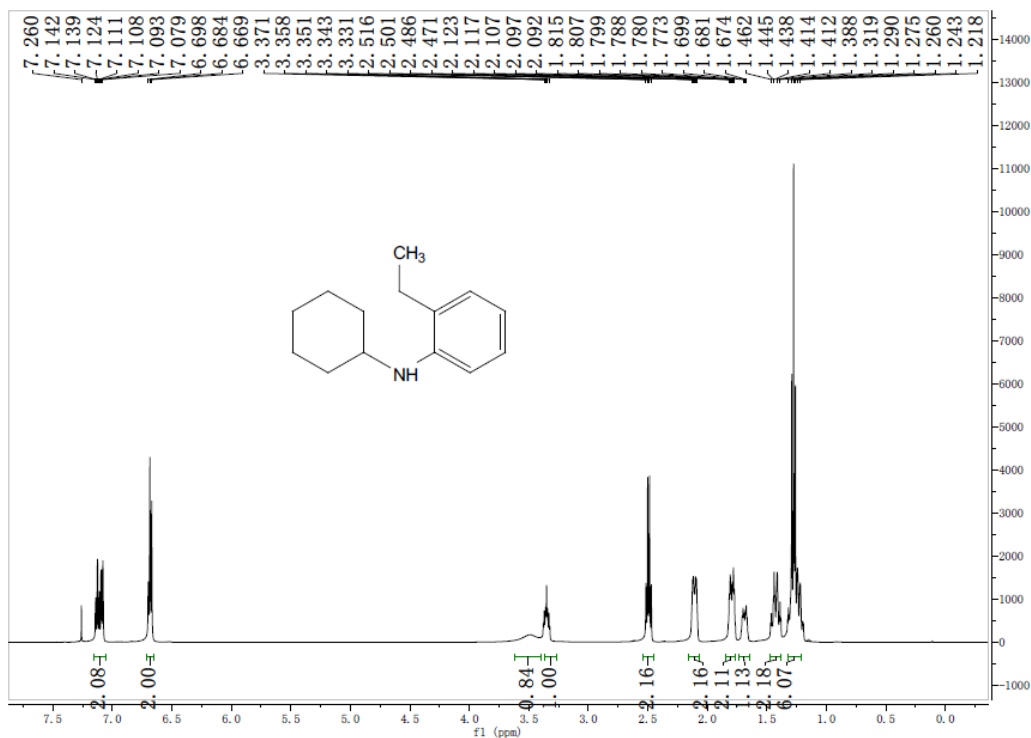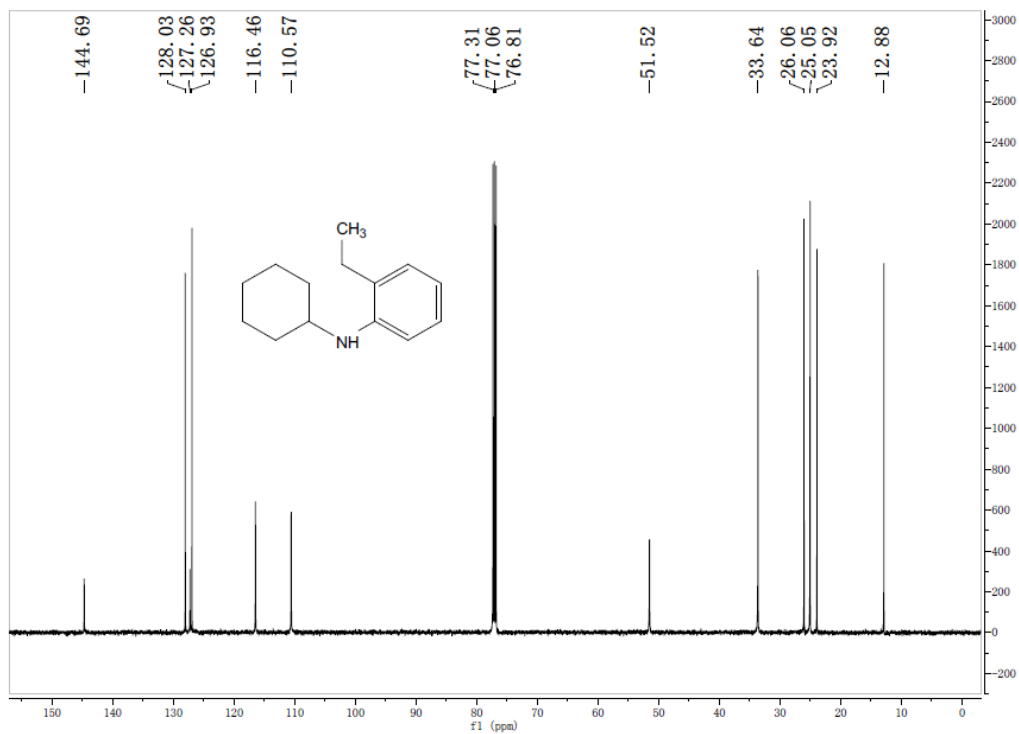

**<sup>1</sup>H NMR and <sup>13</sup>C NMR of *N*-cyclohexyl-4-methylaniline (3f)**

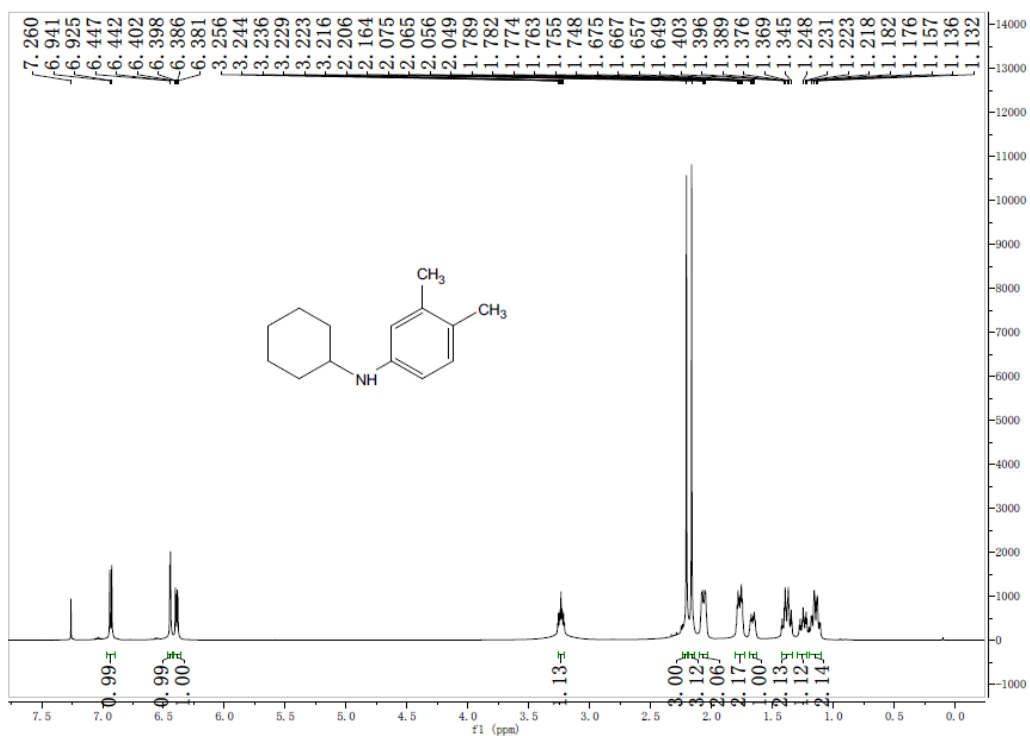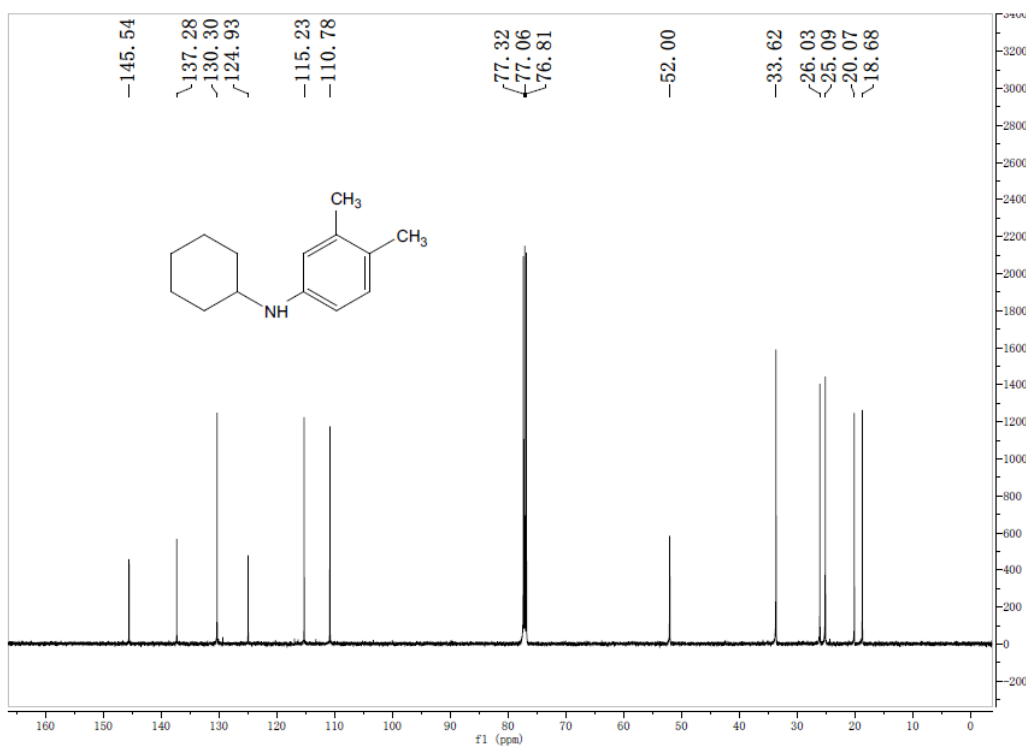

<sup>1</sup>H NMR and <sup>13</sup>C NMR of *N*-cyclohexyl-2,4,6-trimethylaniline (3g)

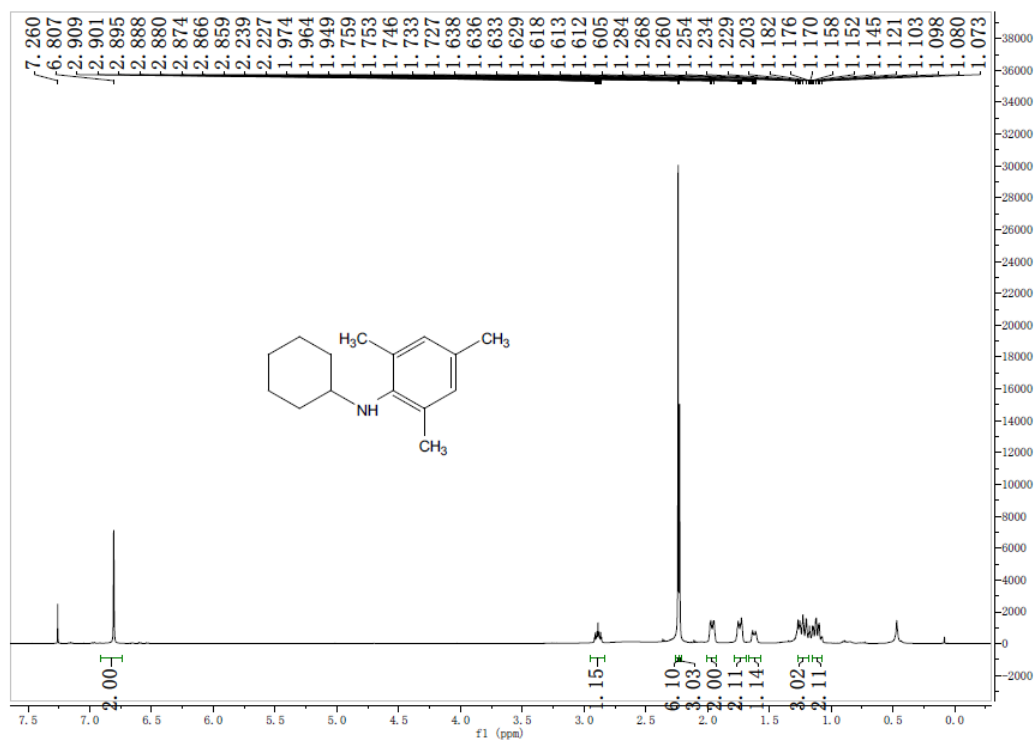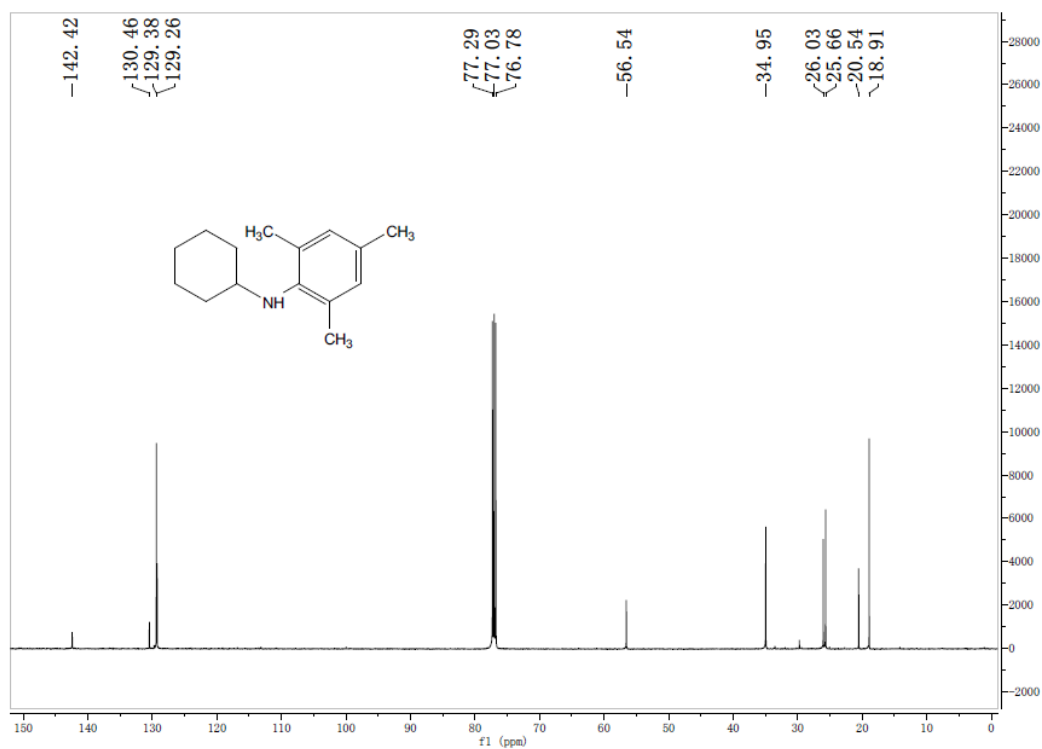

<sup>1</sup>H NMR and <sup>13</sup>C NMR of *N*-cyclohexyl-4-methoxyaniline (3h)

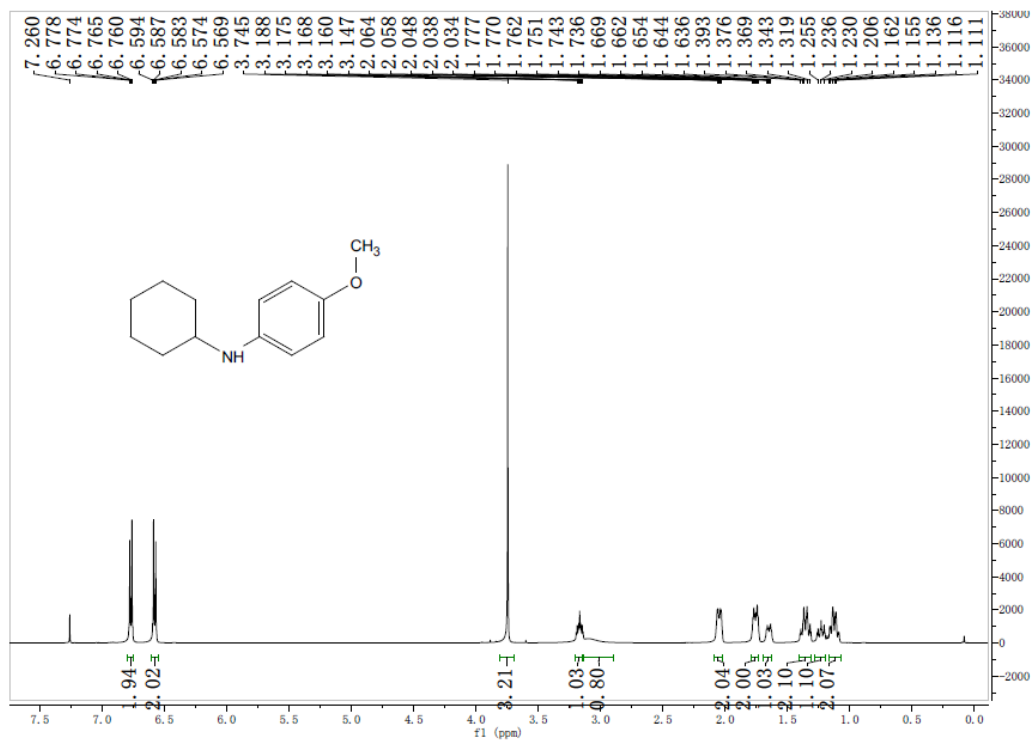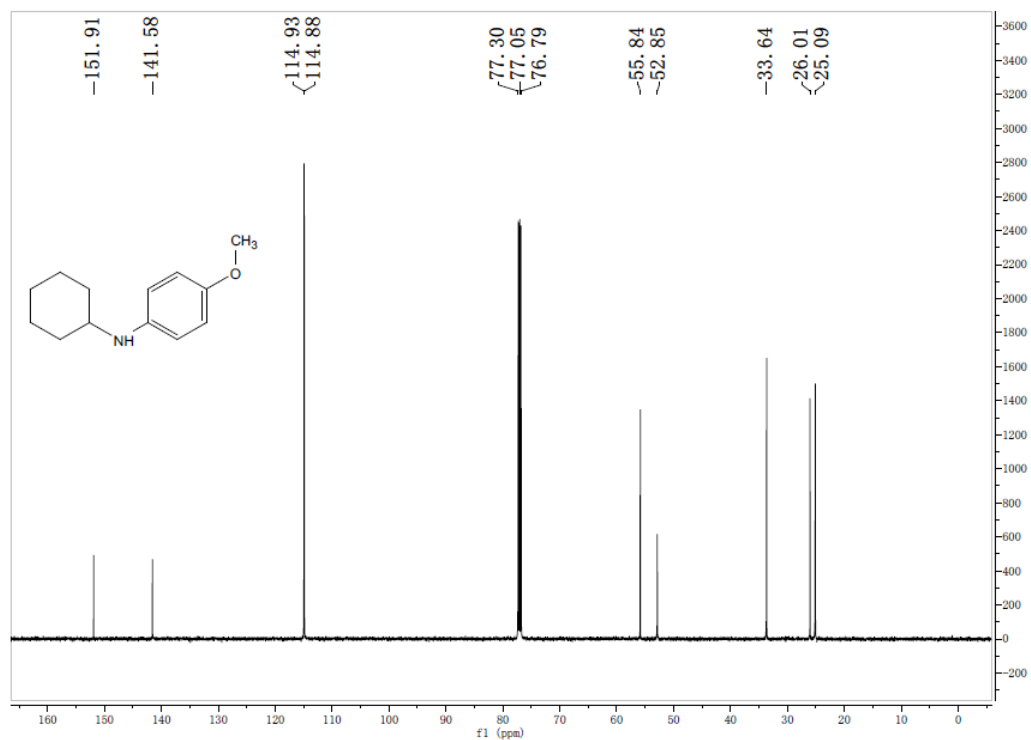

<sup>1</sup>H NMR and <sup>13</sup>C NMR of *N*-cyclohexyl-3-methoxyaniline (3i)

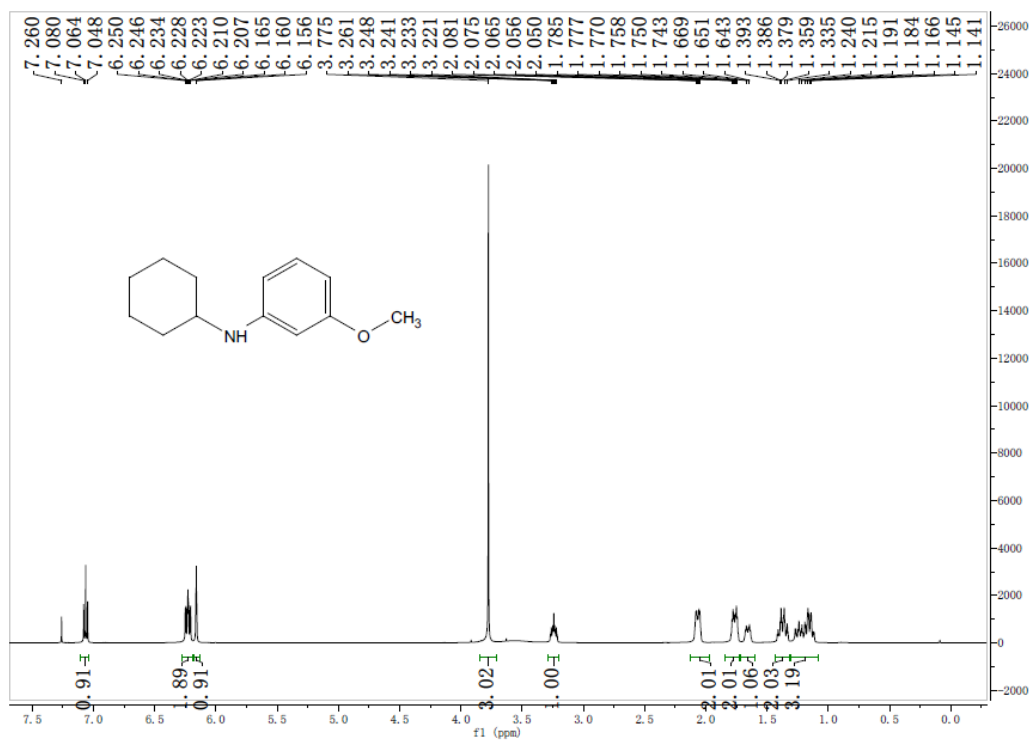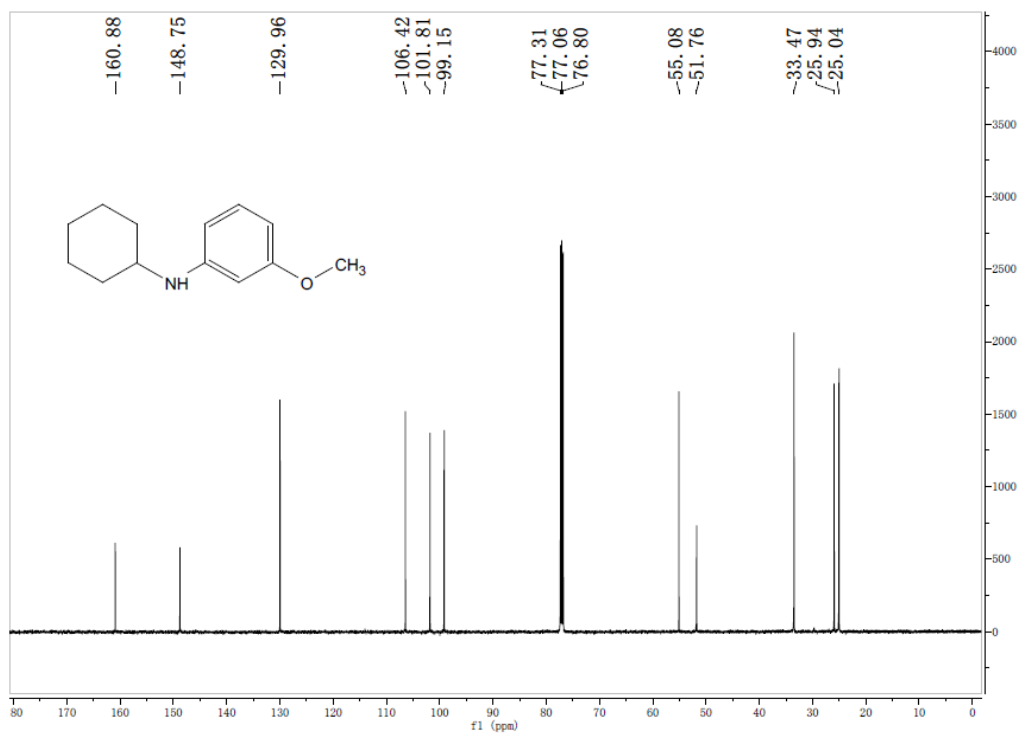

<sup>1</sup>H NMR and <sup>13</sup>C NMR of *N*-cyclohexyl-2-methoxyaniline (3j)

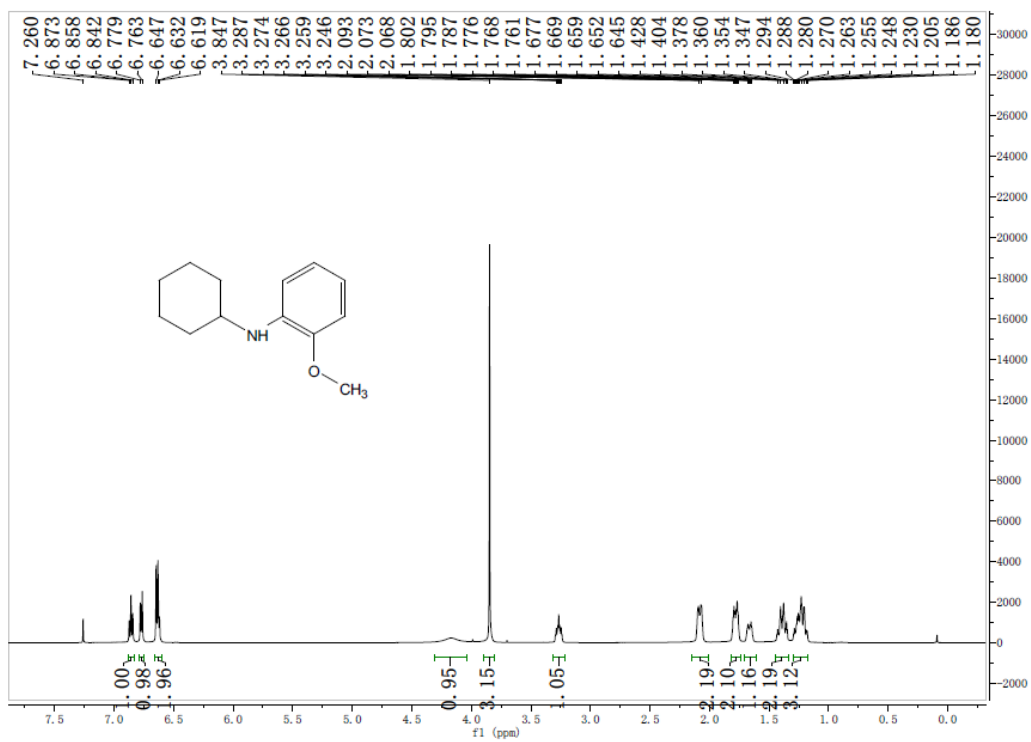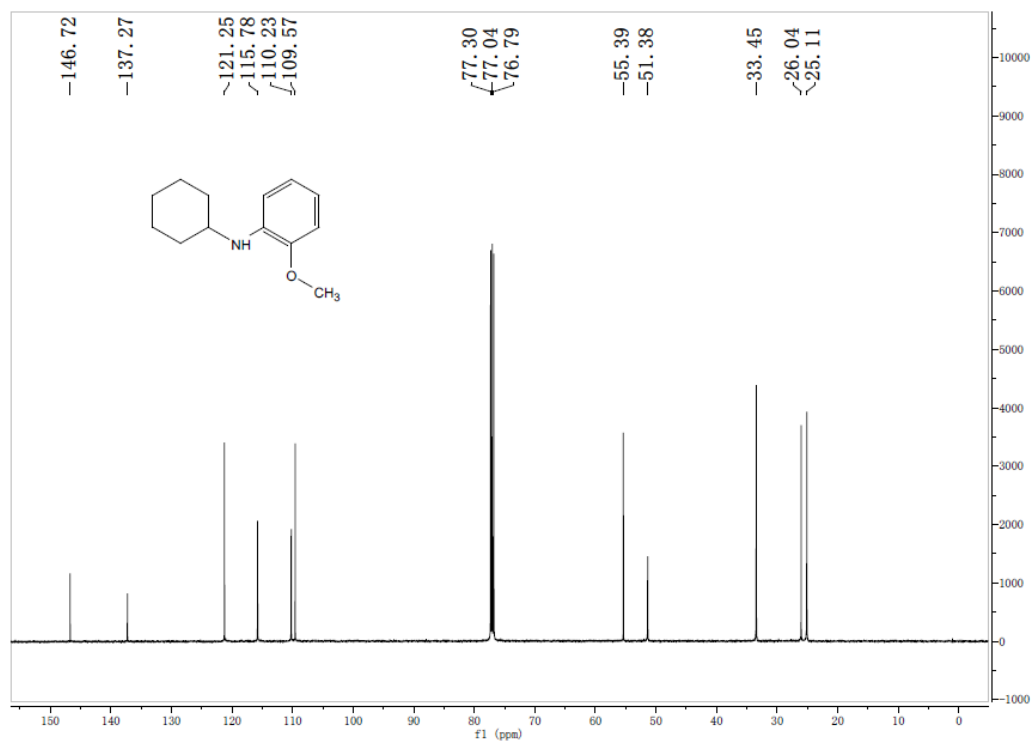

<sup>1</sup>H NMR and <sup>13</sup>C NMR of *N*-cyclohexyl-2,4-dimethoxyaniline (3k)

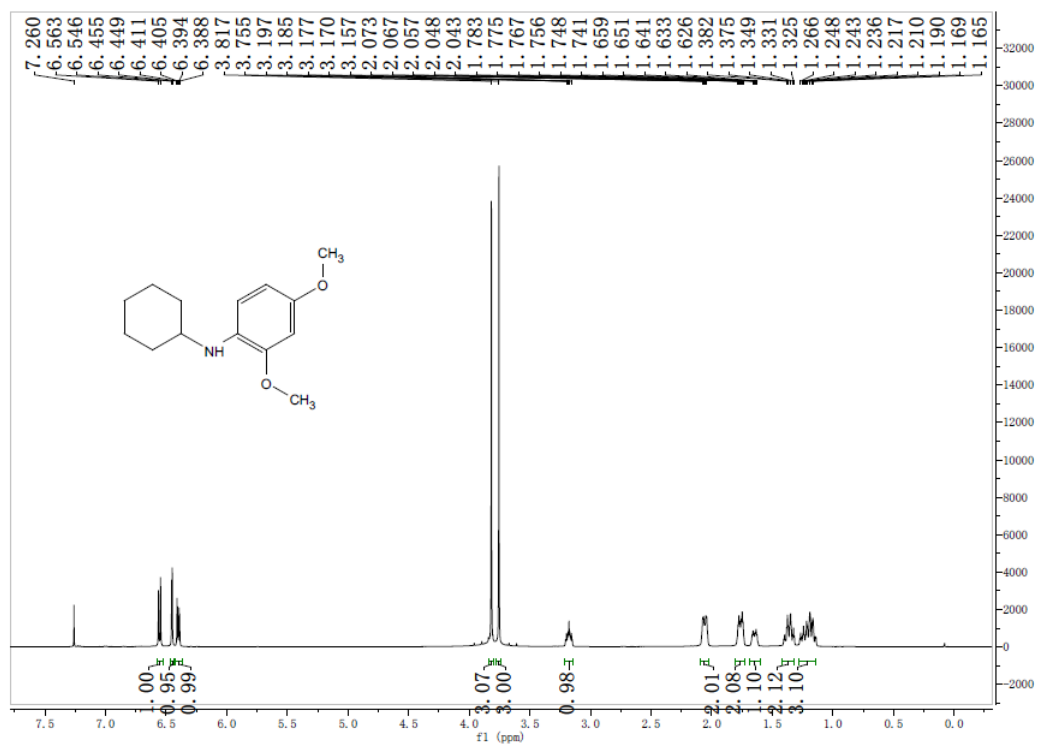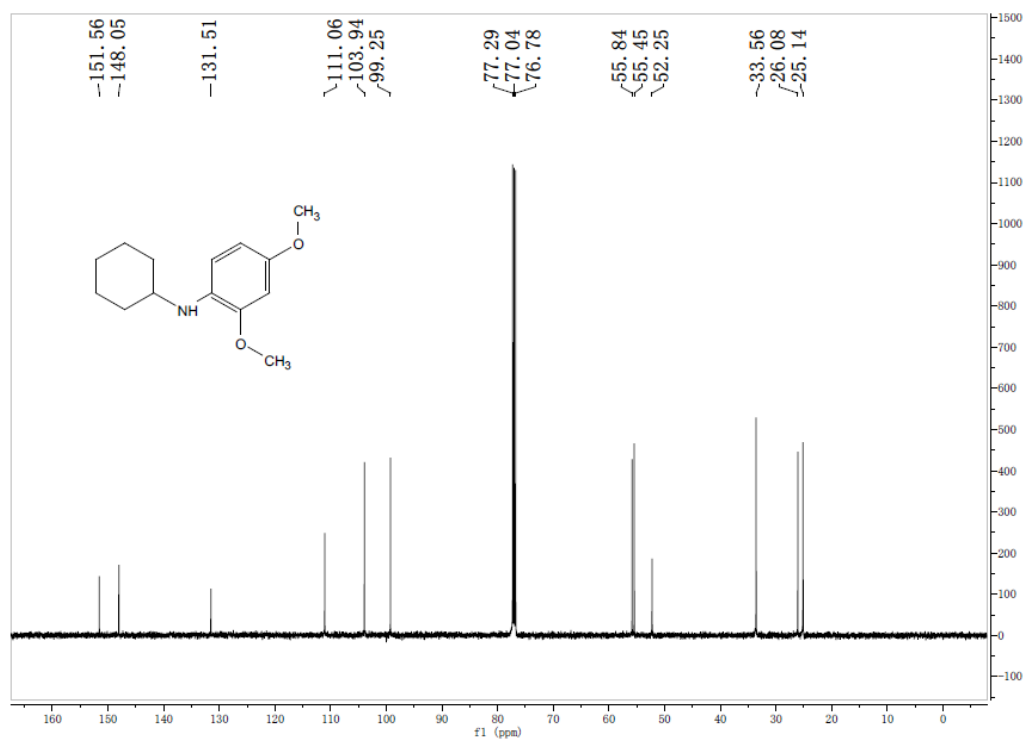



<sup>1</sup>H NMR and <sup>13</sup>C NMR of *N*-cyclohexyl-2,5-dimethoxyaniline (3)

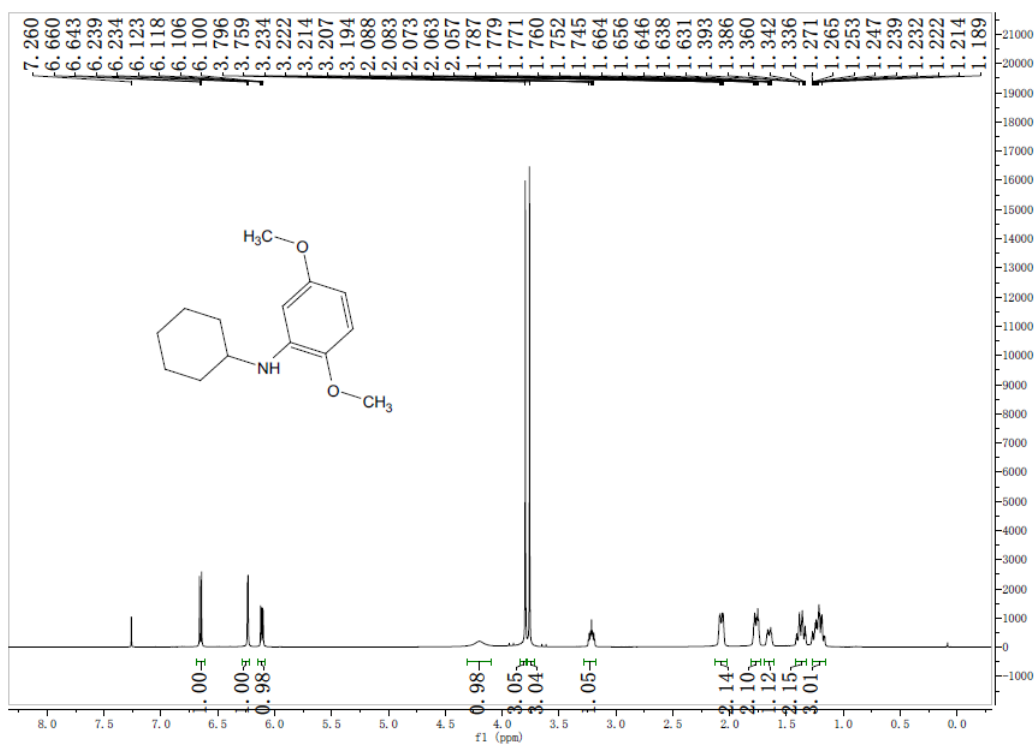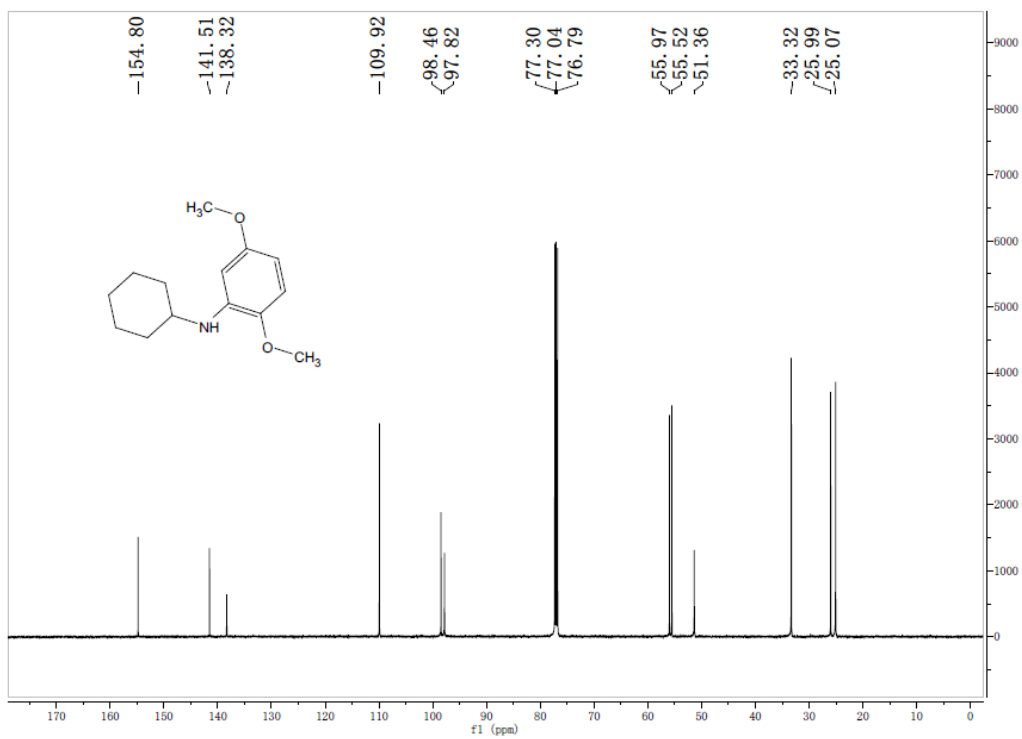

<sup>1</sup>H NMR and <sup>13</sup>C NMR of *N*-cyclohexyl-3-ethylaniline (3m)

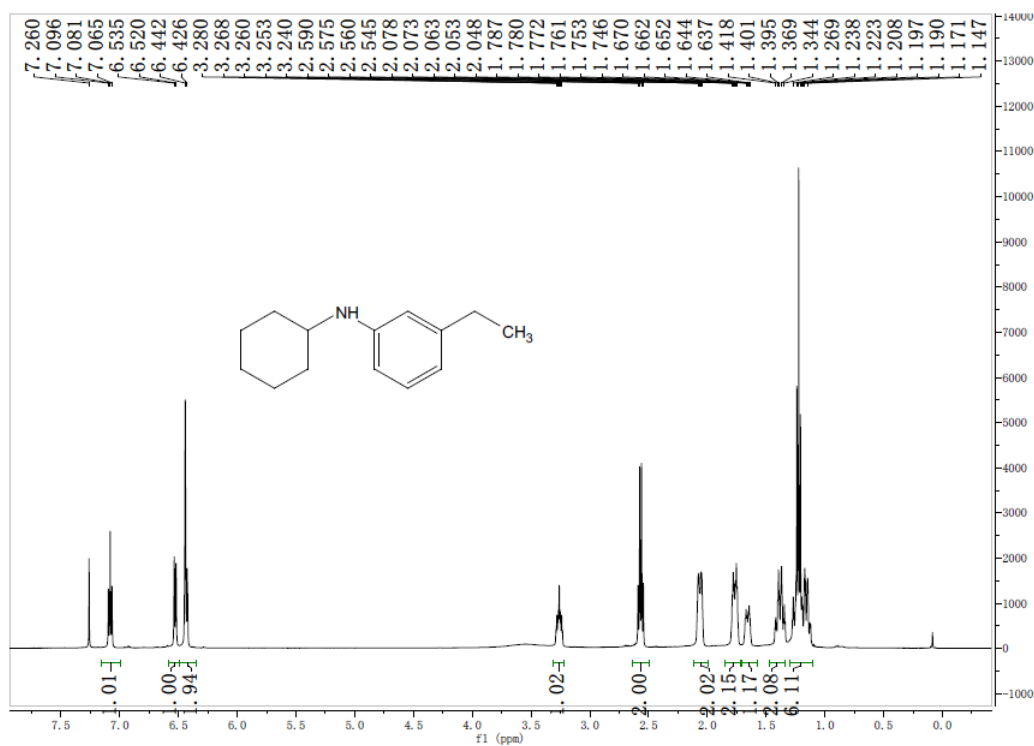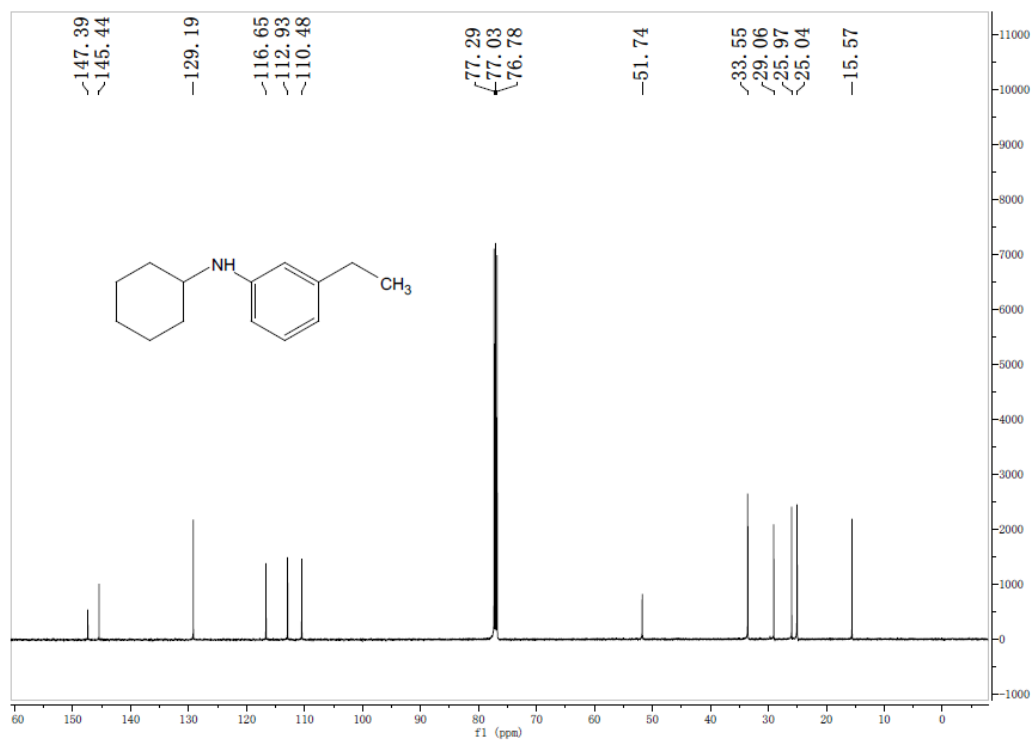

### <sup>1</sup>H NMR and <sup>13</sup>C NMR of *N*-cyclohexyl-naphthalen-1-amine (3n)

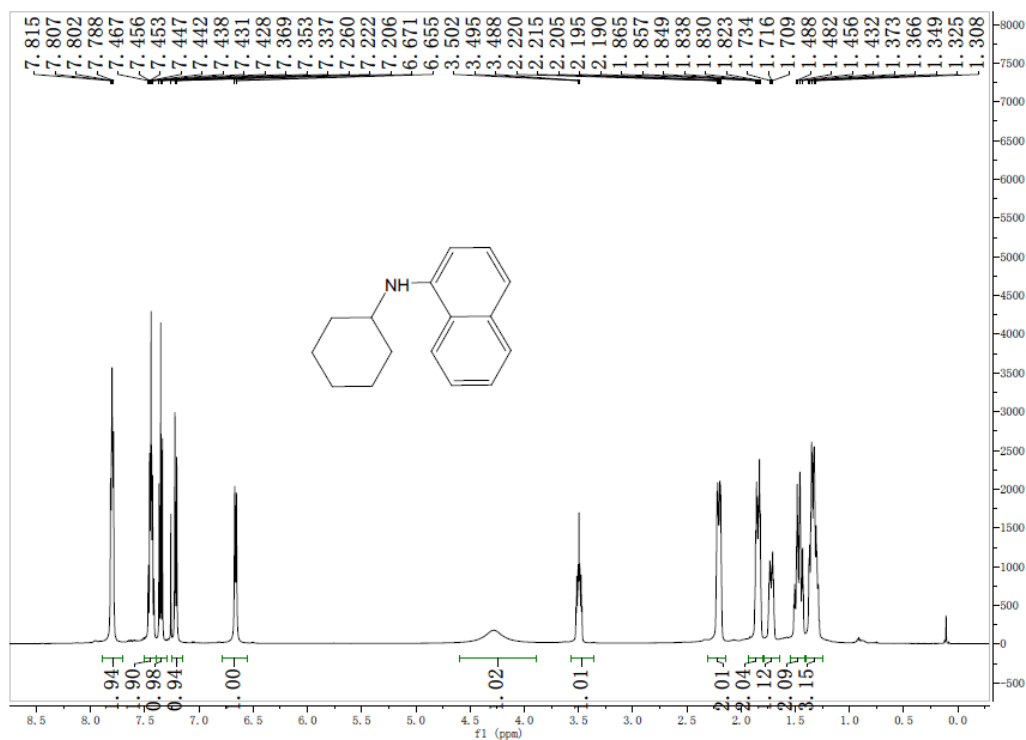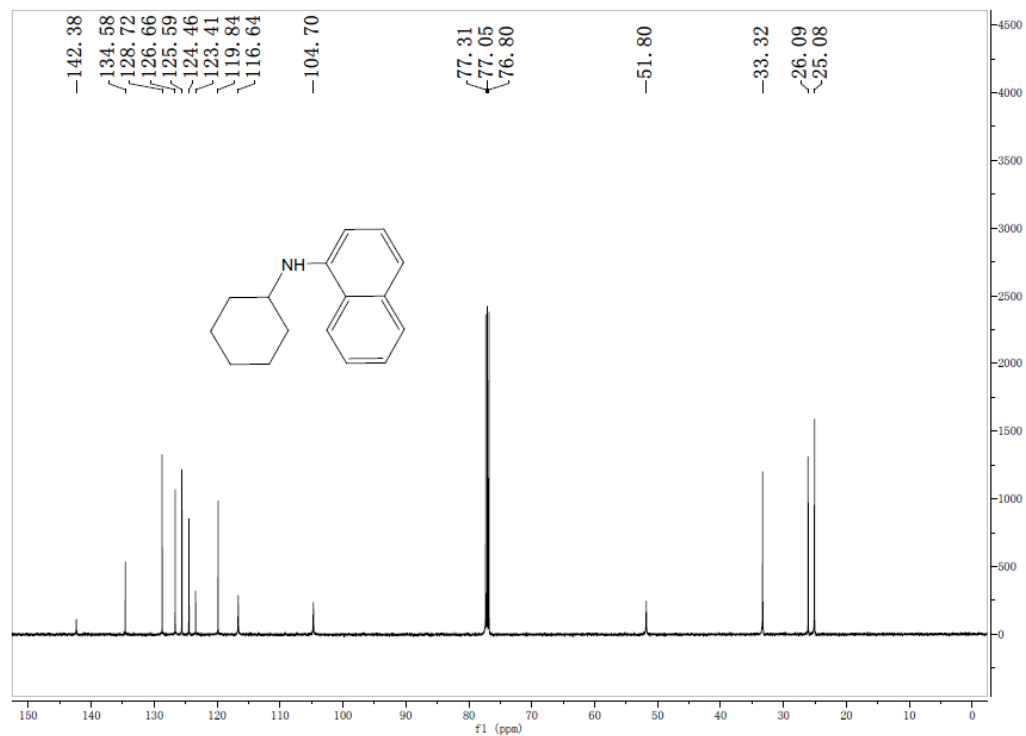

**<sup>1</sup>H NMR and <sup>13</sup>C NMR of *N*<sup>1</sup>-cyclohexyl-*N*<sup>4</sup>-phenylbenzene-1,4-diamine (30)**

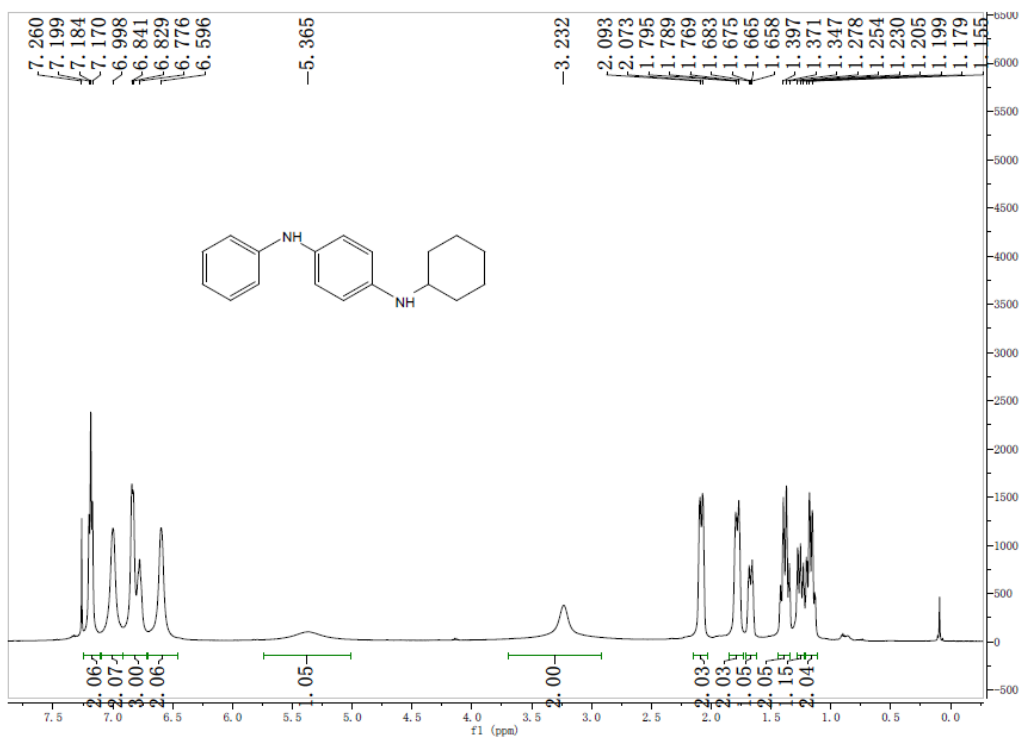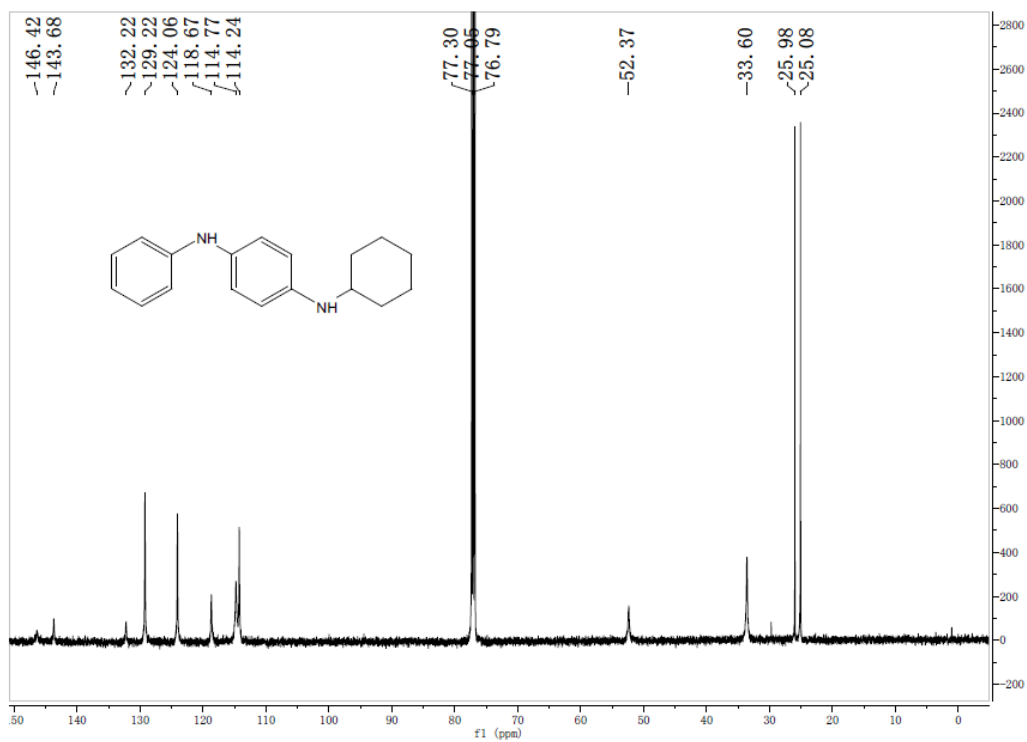

<sup>1</sup>H NMR and <sup>13</sup>C NMR of *N*<sup>2</sup>-cyclohexyl-[1,1'-biphenyl]-2,2'-diamine (3p)

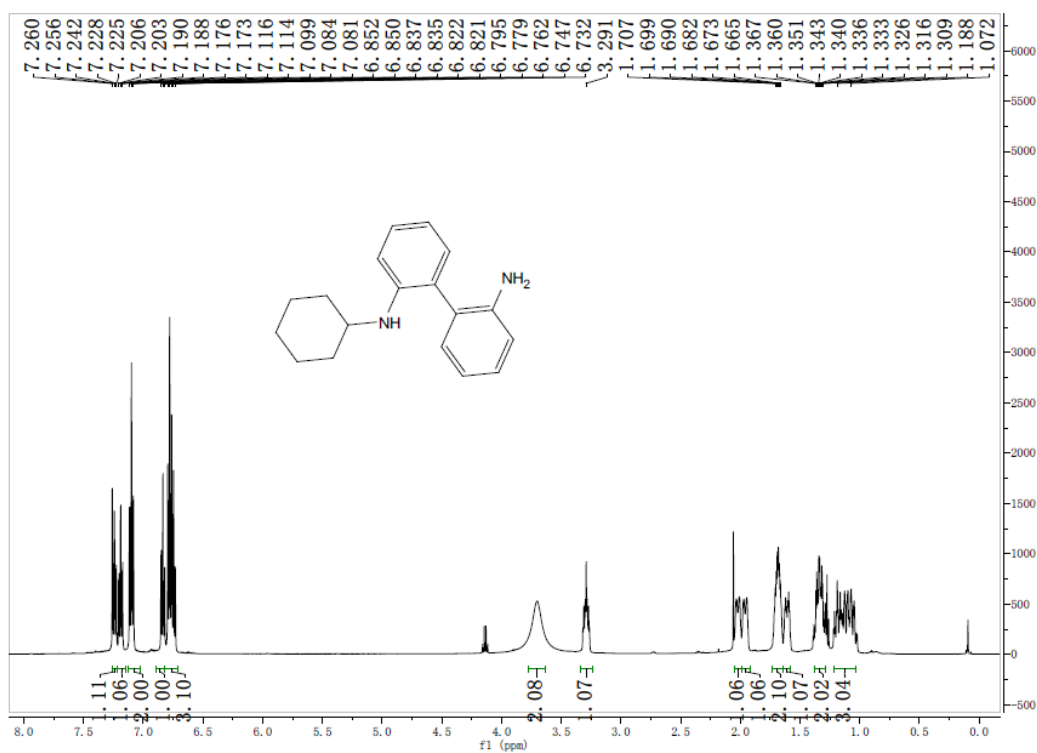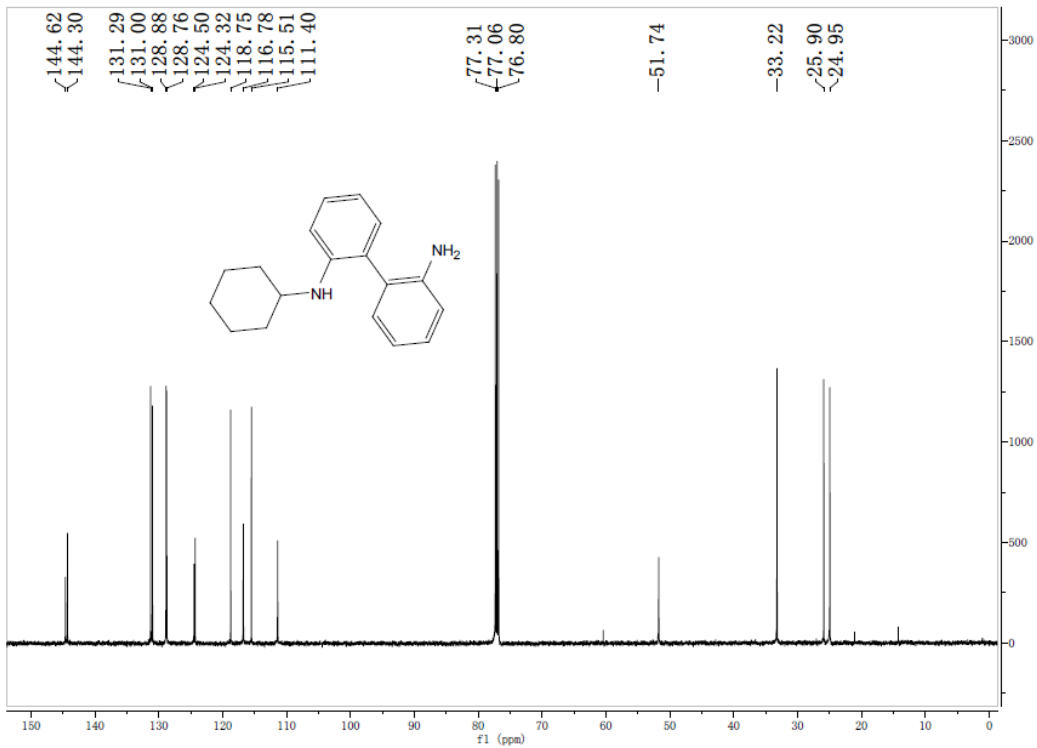

**<sup>1</sup>H NMR and <sup>13</sup>C NMR of *N*-cyclohexylquinolin-8-amine (3q)**

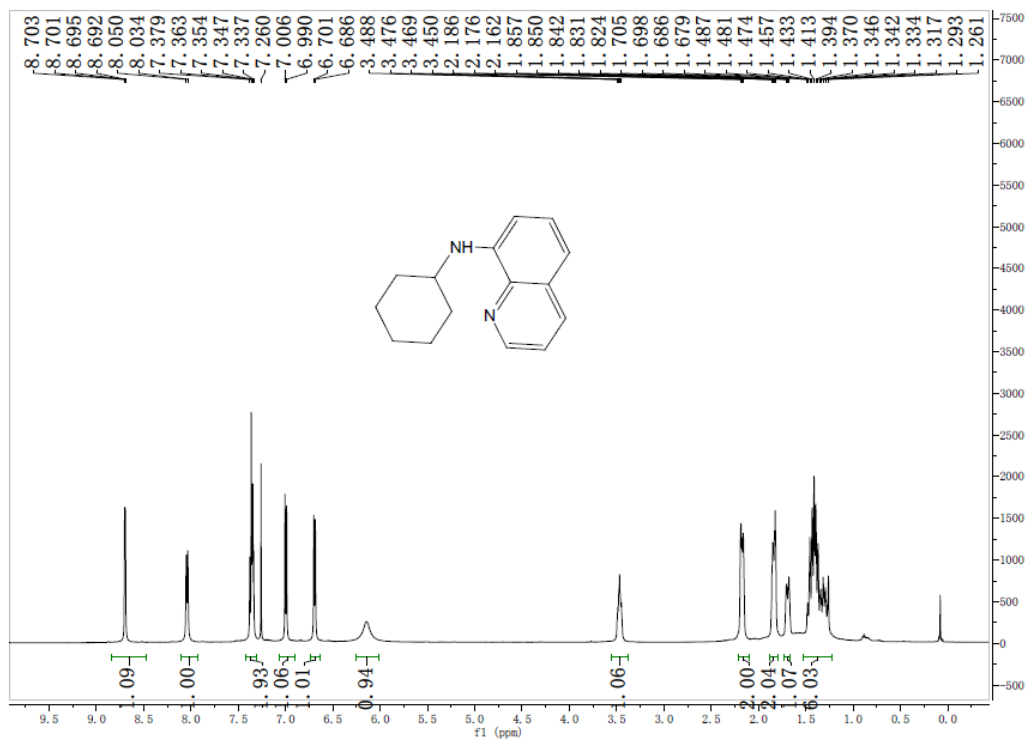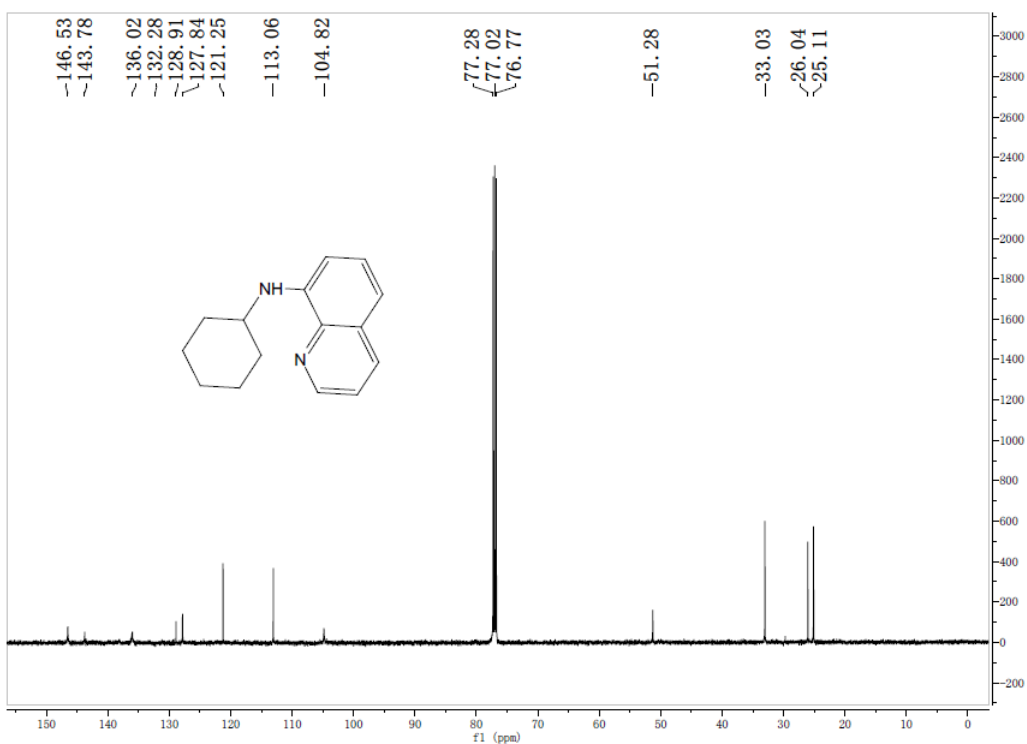

**<sup>1</sup>H NMR and <sup>13</sup>C NMR of 1-(4-(cyclohexylamino)phenyl)ethanone (3r)**

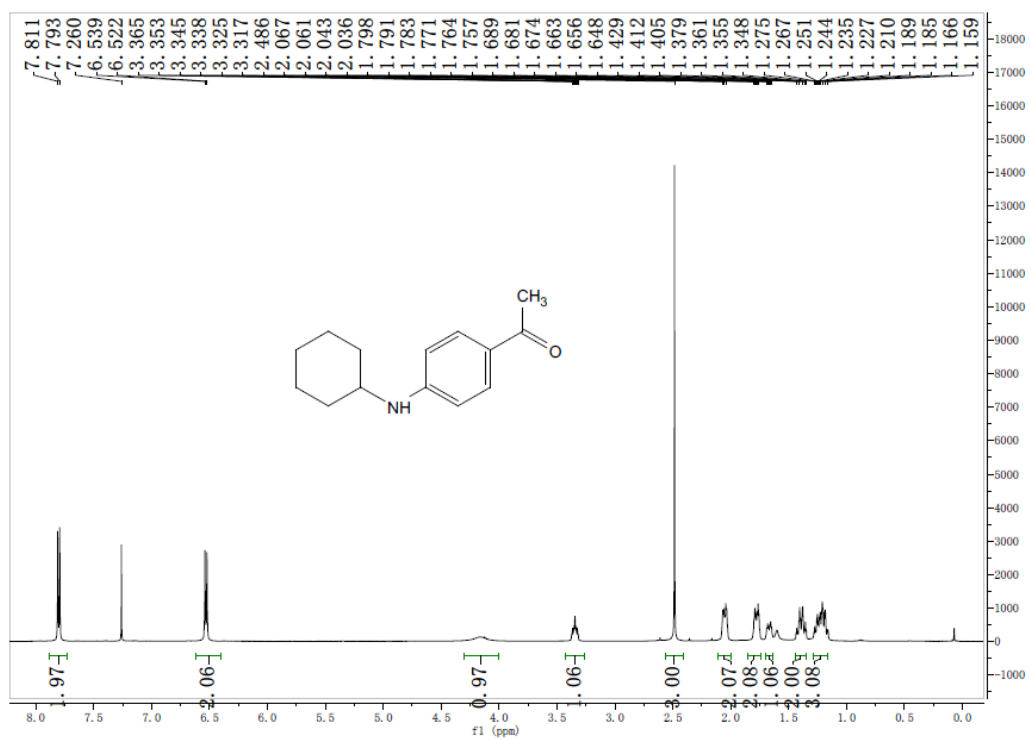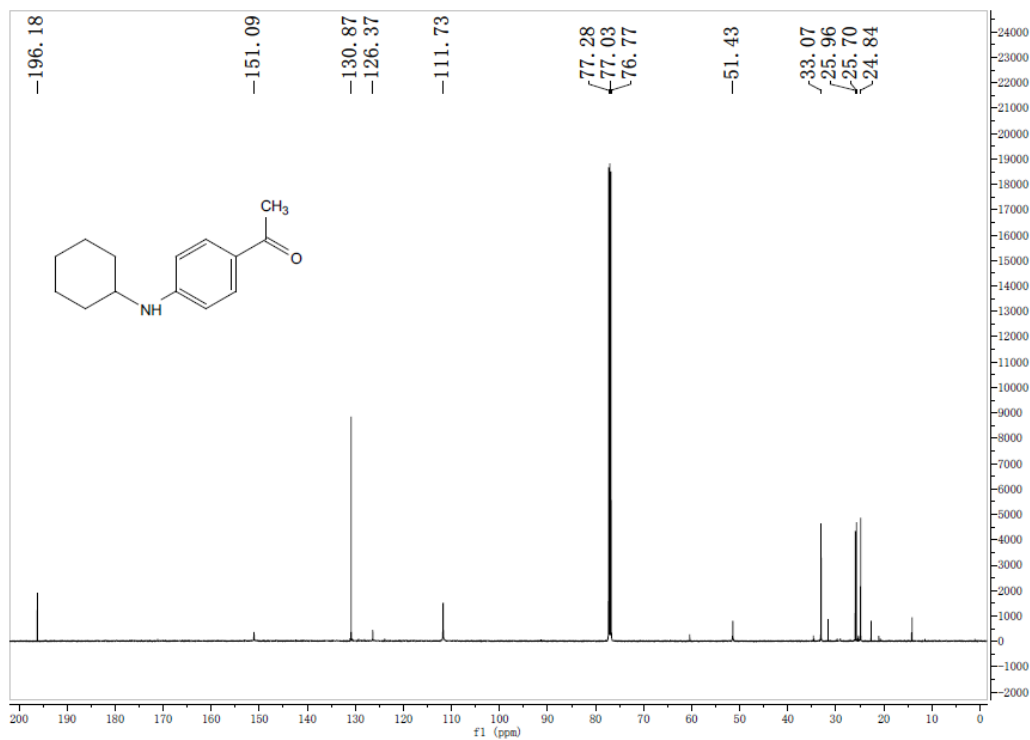

<sup>1</sup>H NMR and <sup>13</sup>C NMR of *N*-cyclohexyl-4-(trifluoromethyl)aniline (3s)

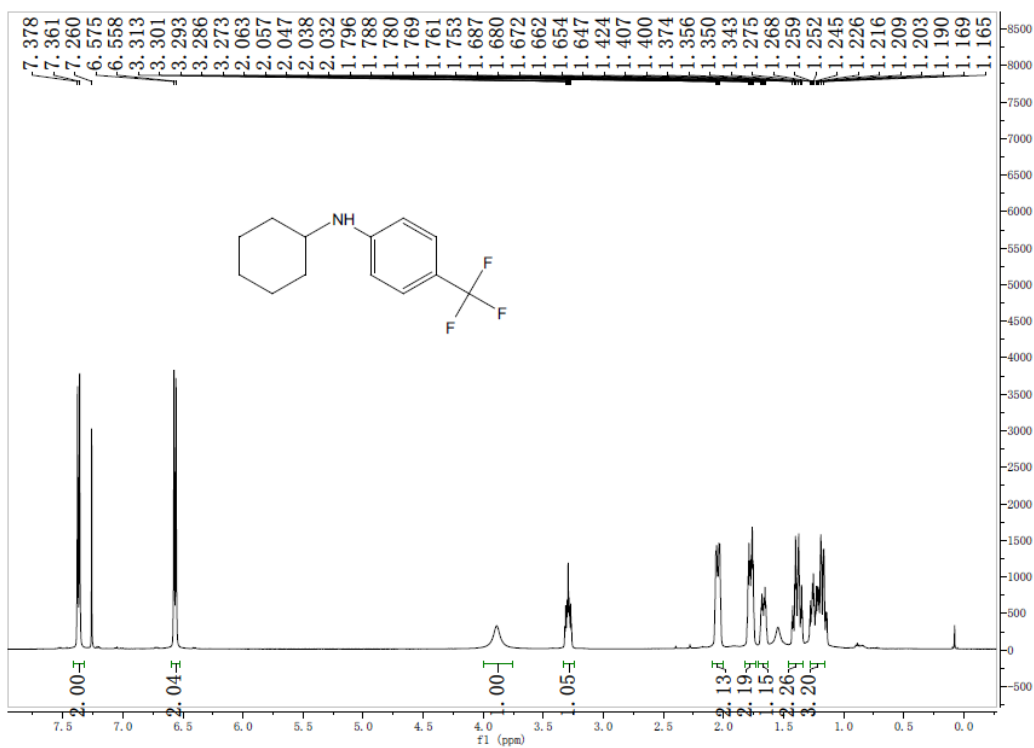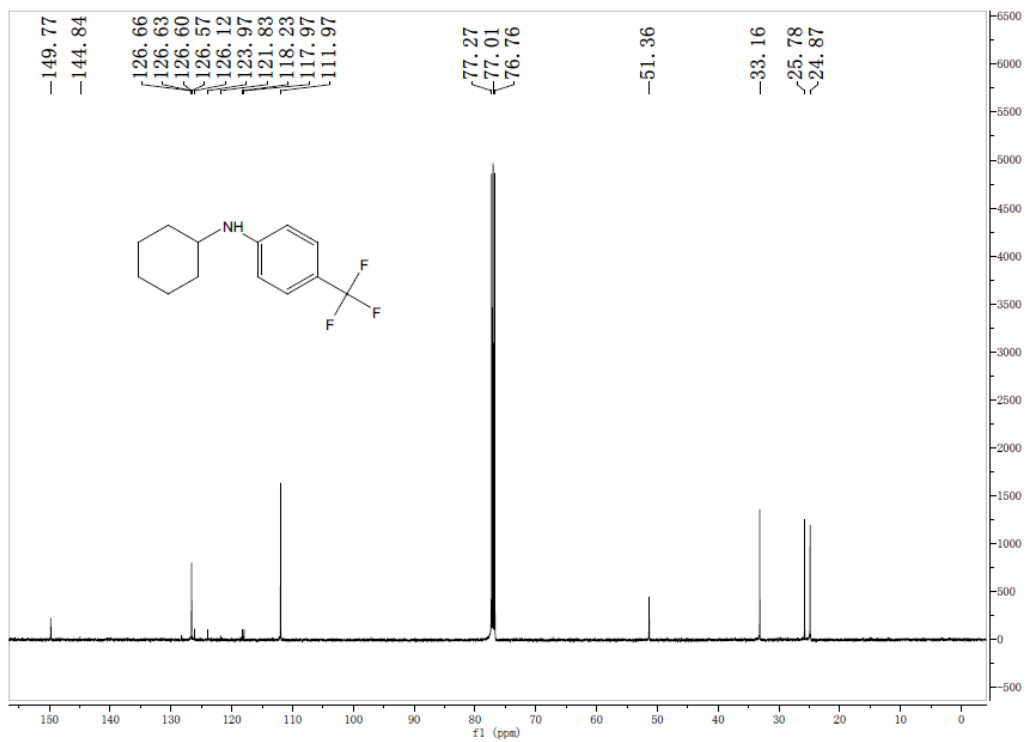



<sup>1</sup>H NMR and <sup>13</sup>C NMR of *N*-cyclohexyl-*N*-methylaniline (3t)

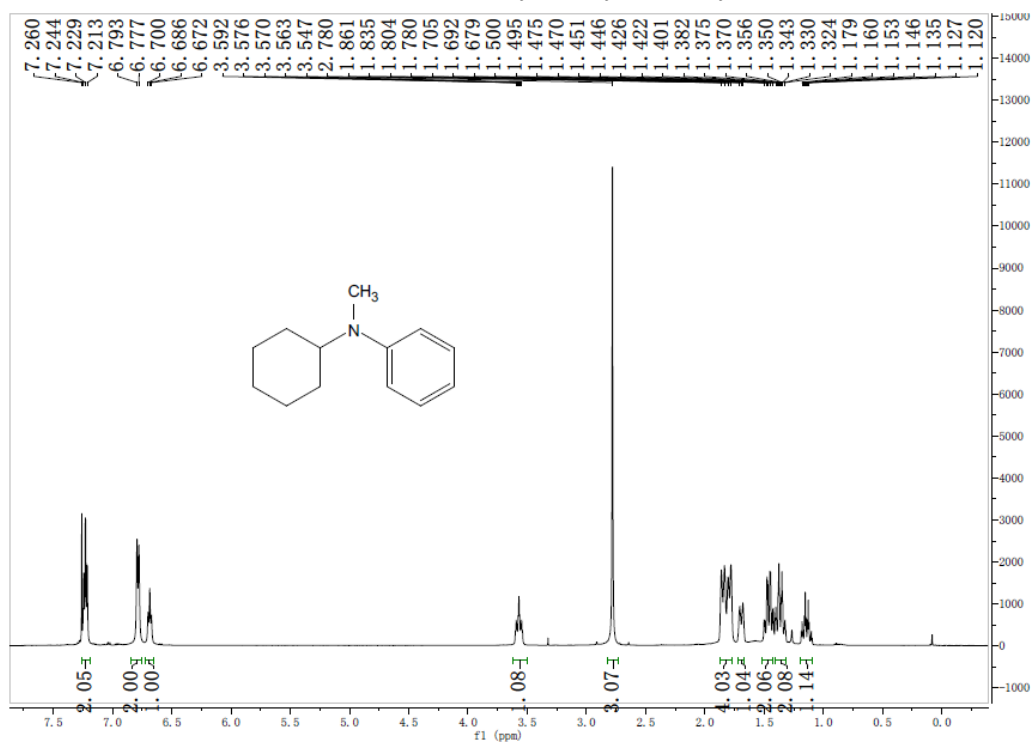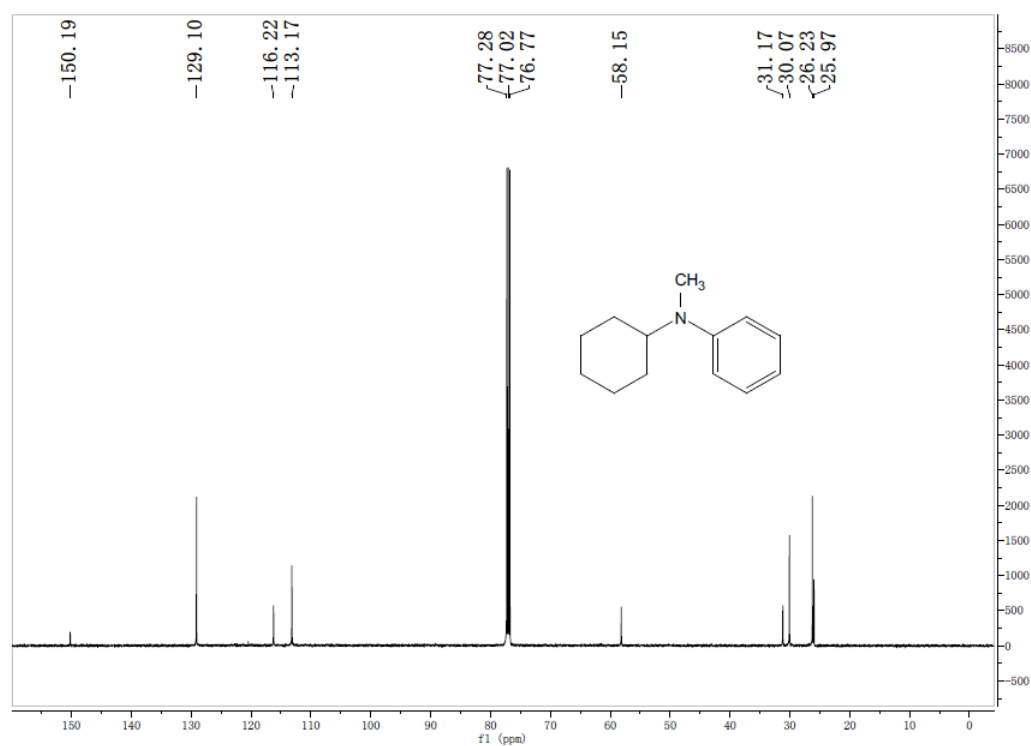

**<sup>1</sup>H NMR and <sup>13</sup>C NMR of *N*-cyclohexyl-*N*-ethylaniline (3u)**

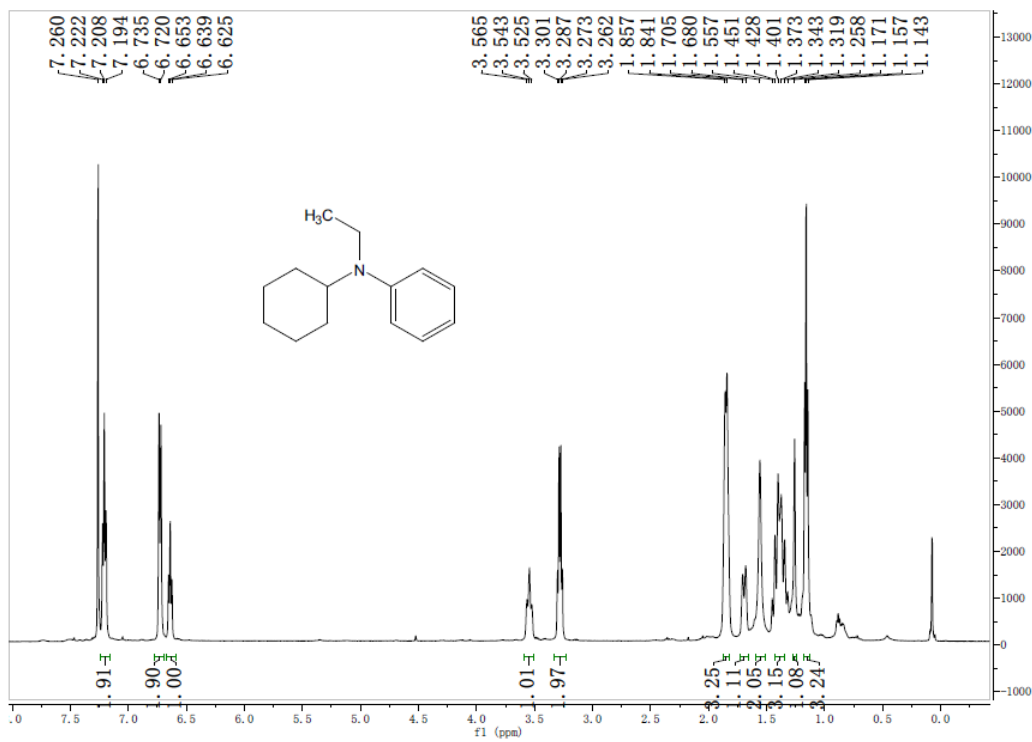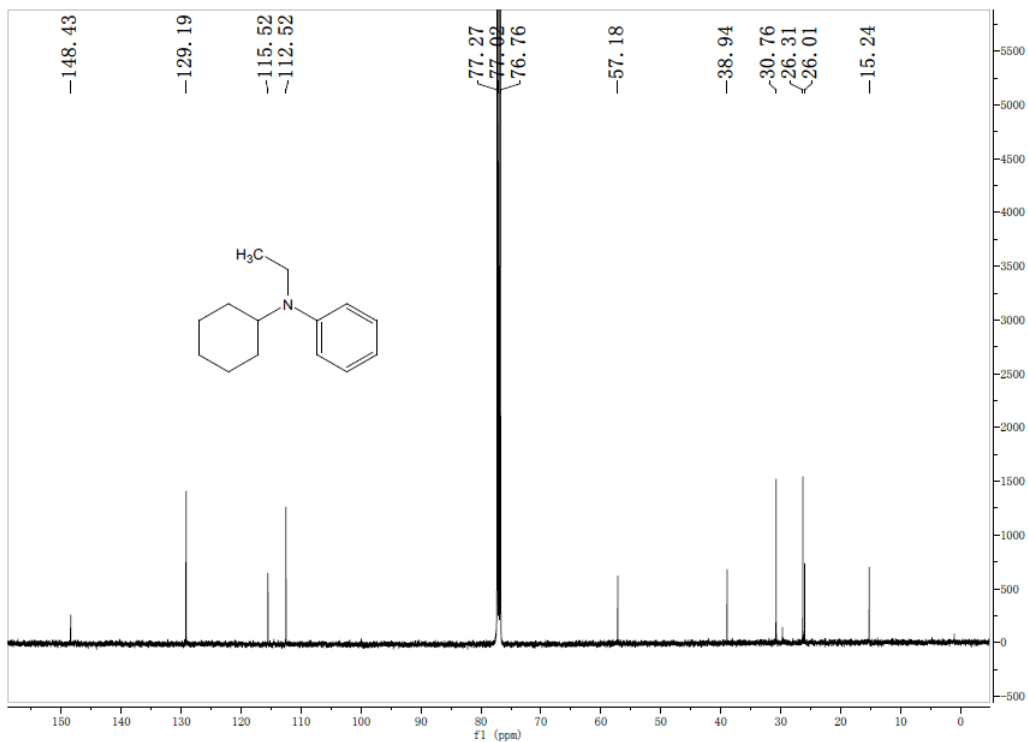

<sup>1</sup>H NMR and <sup>13</sup>C NMR of *N*-octylcyclohexanamine (3v)

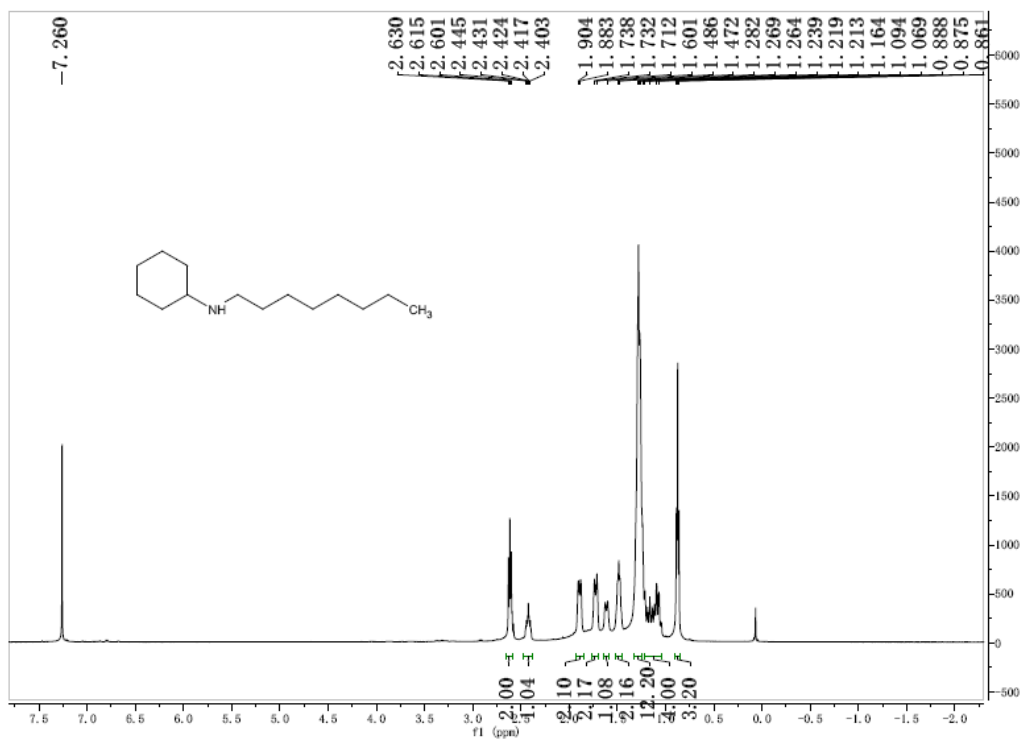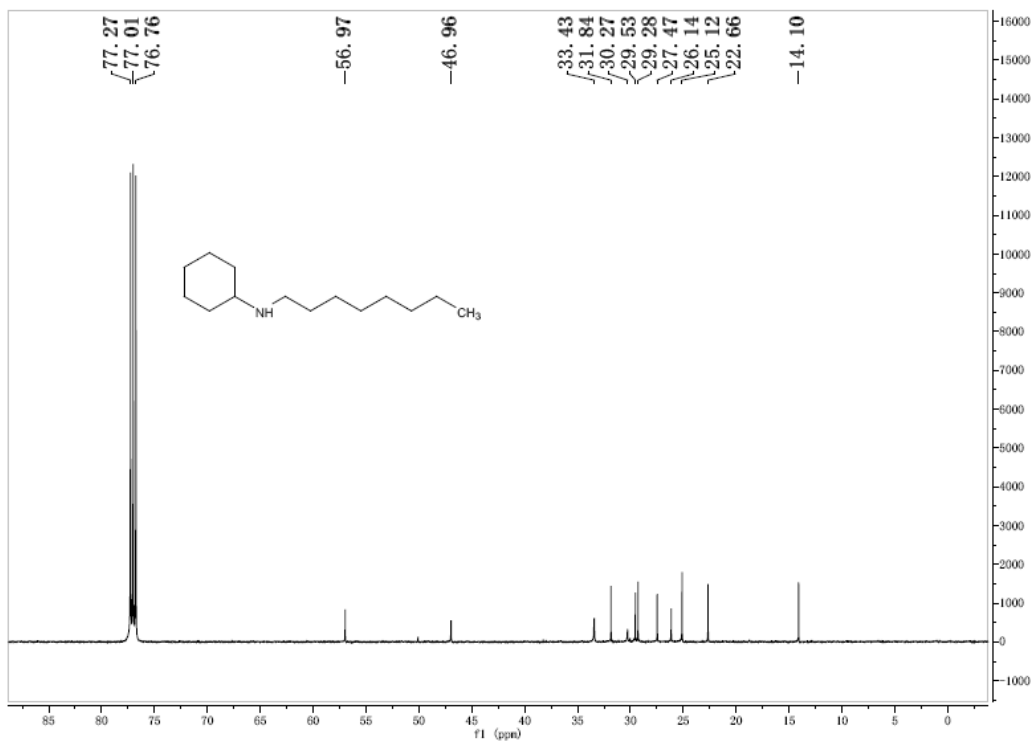

<sup>1</sup>H NMR and <sup>13</sup>C NMR of 2-cyclohexyl-1,2,3,4-tetrahydroisoquinoline (3w)

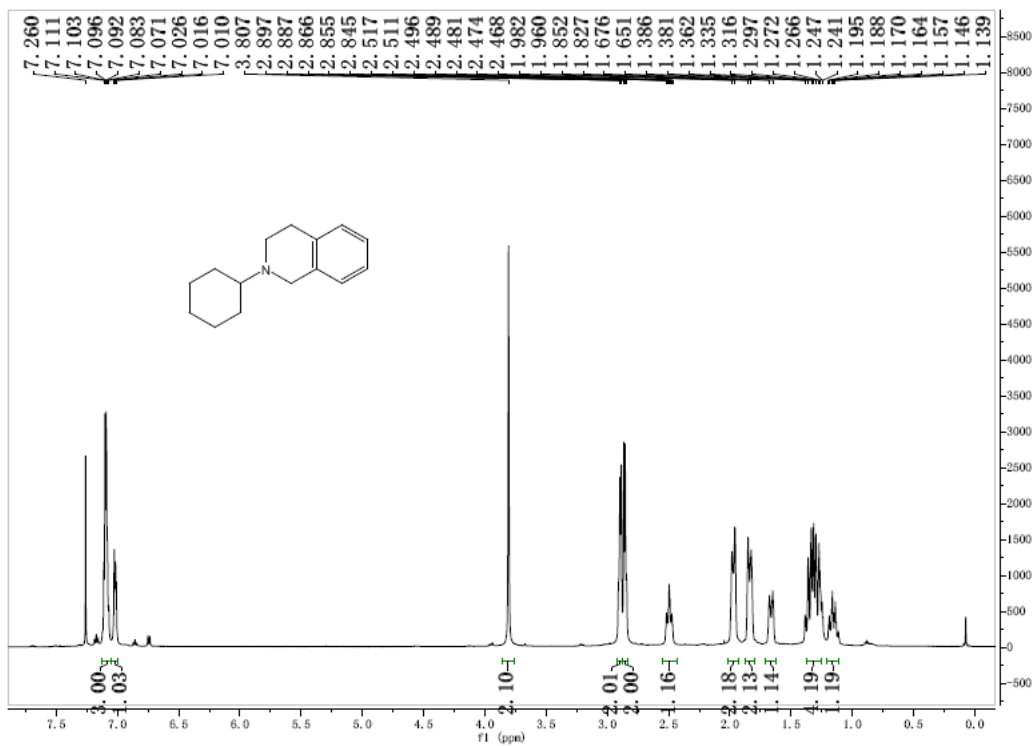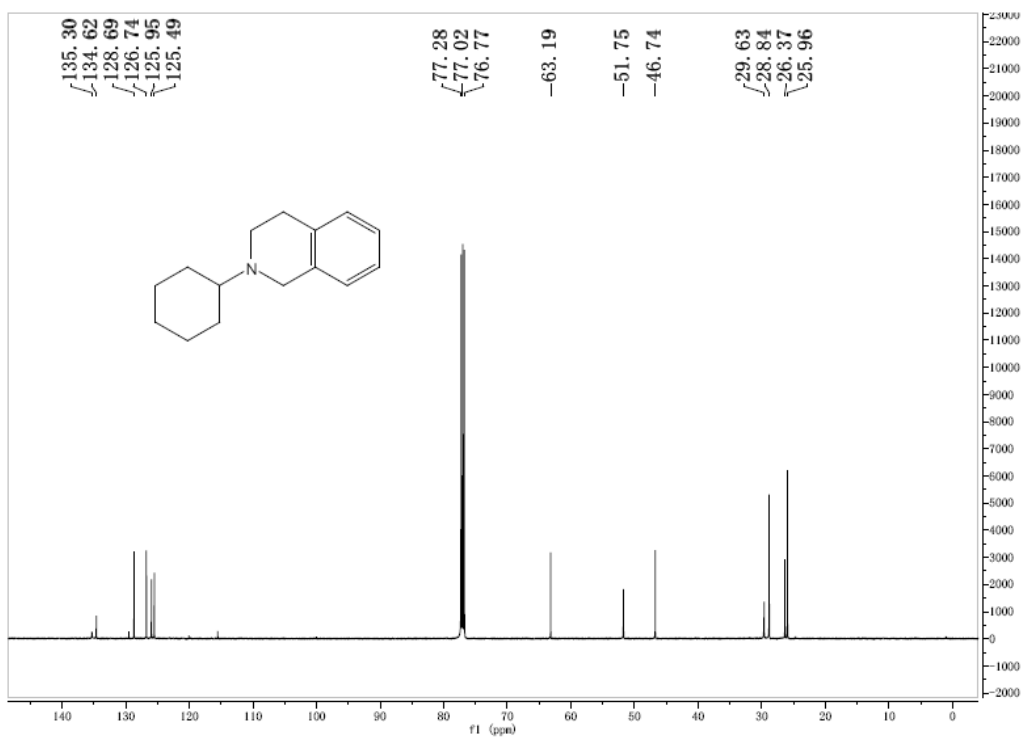

**<sup>1</sup>H NMR and <sup>13</sup>C NMR of *cis*-4-methyl-*N*-(4-methylcyclohexyl)aniline (4a)**

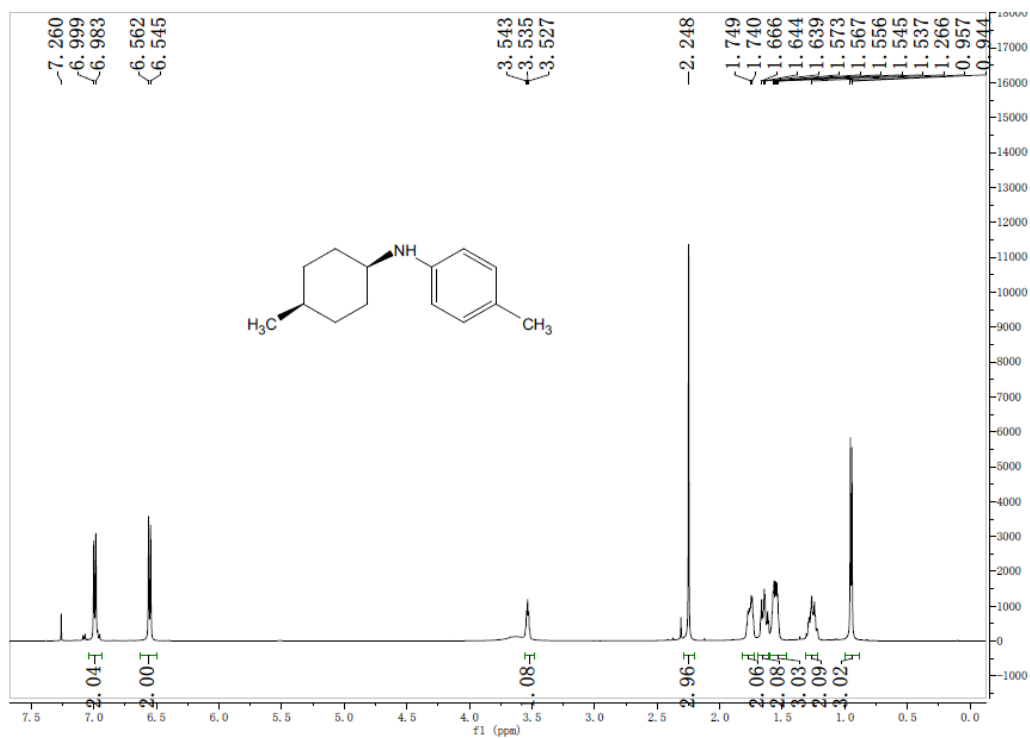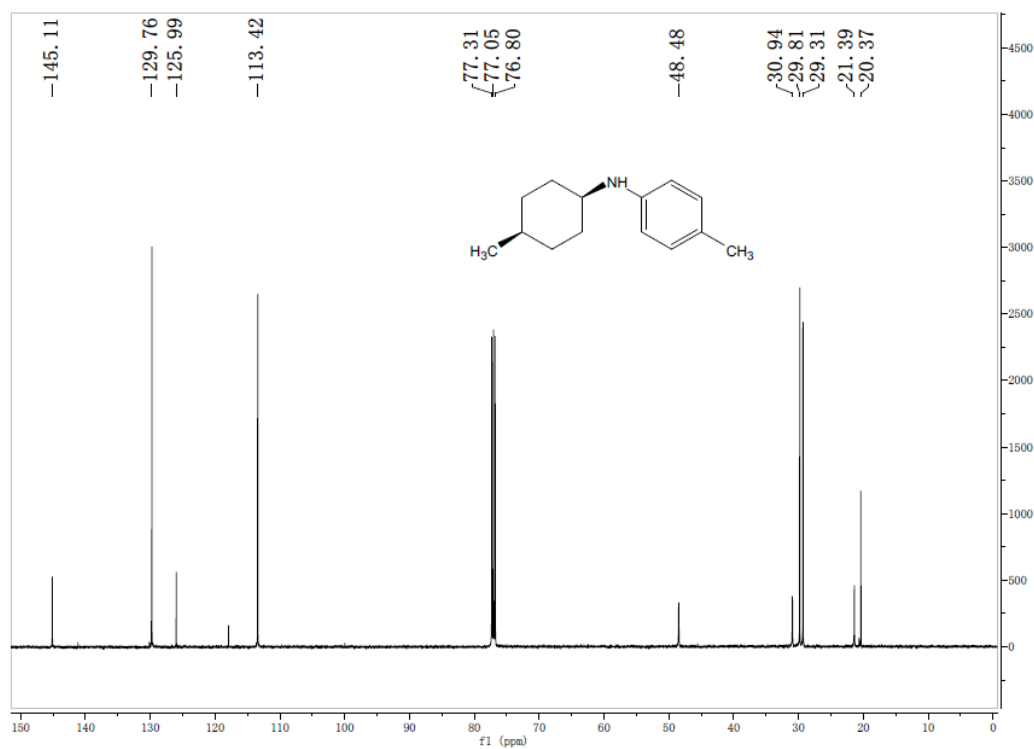

<sup>1</sup>H NMR and <sup>13</sup>C NMR of *trans*-4-methyl-*N*-(4-methylcyclohexyl)aniline (4a)

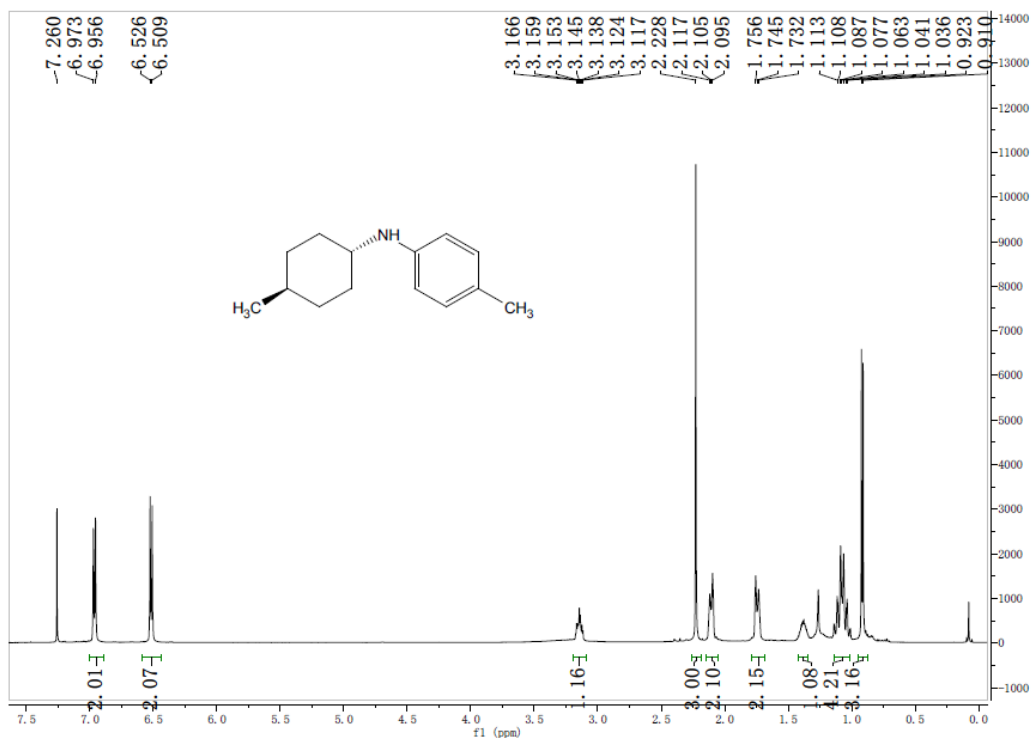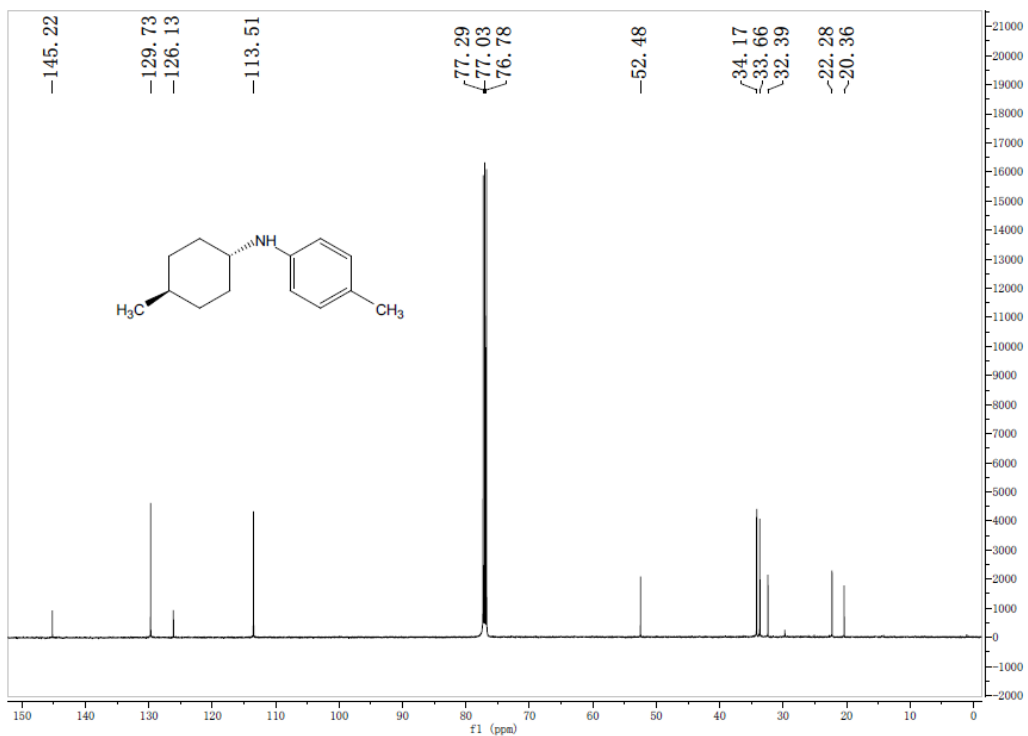

**<sup>1</sup>H NMR and <sup>13</sup>C NMR of *cis*-4-methyl-*N*-(3-methylcyclohexyl)aniline (4b)**

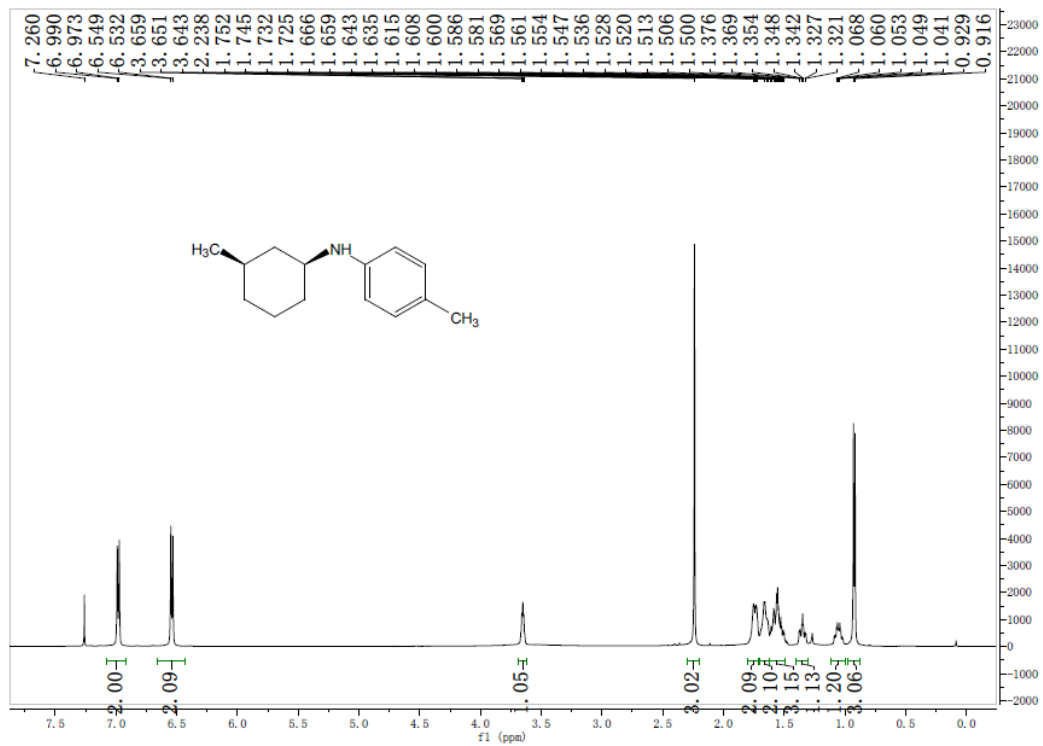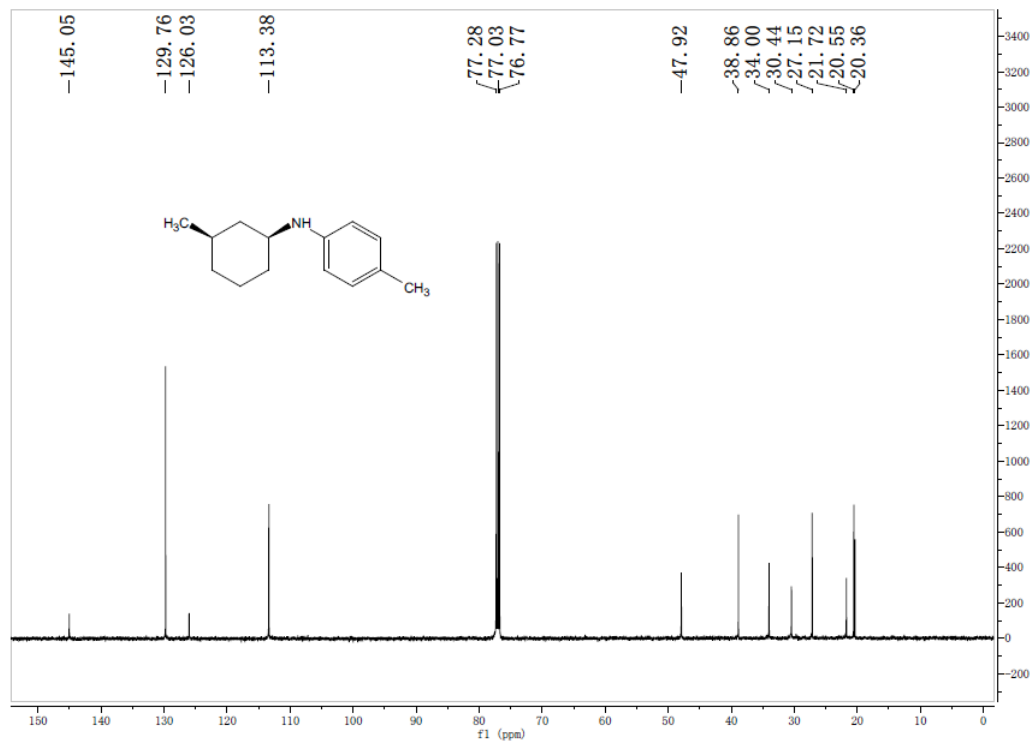

**<sup>1</sup>H NMR and <sup>13</sup>C NMR of *trans*-4-methyl-*N*-(3-methylcyclohexyl)aniline (4b)**

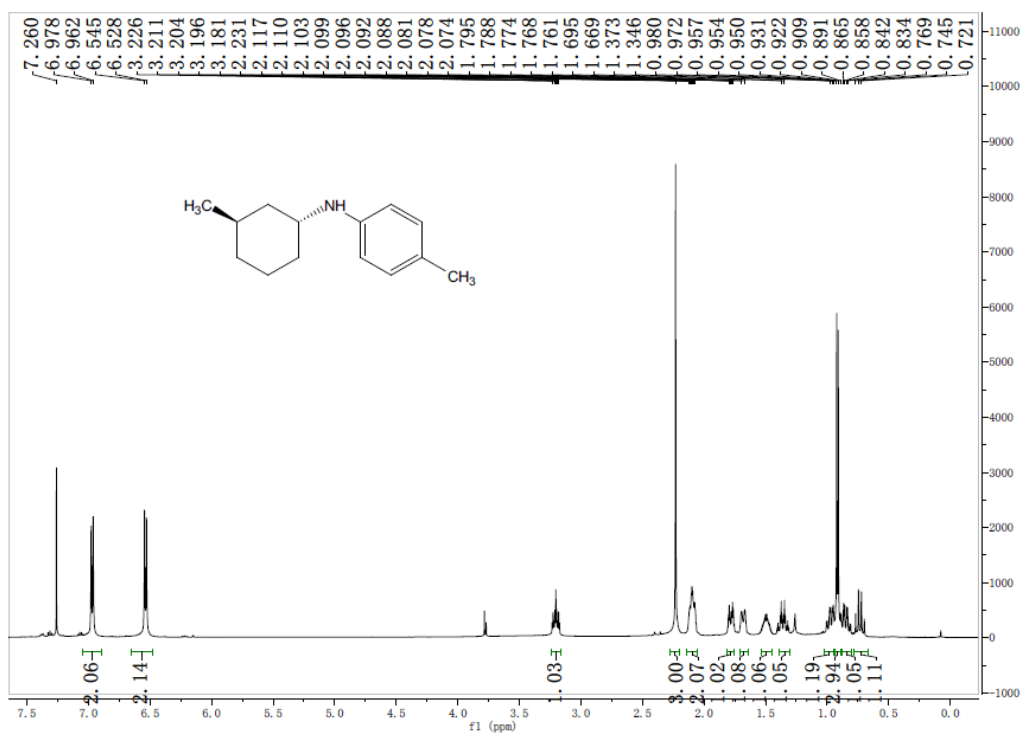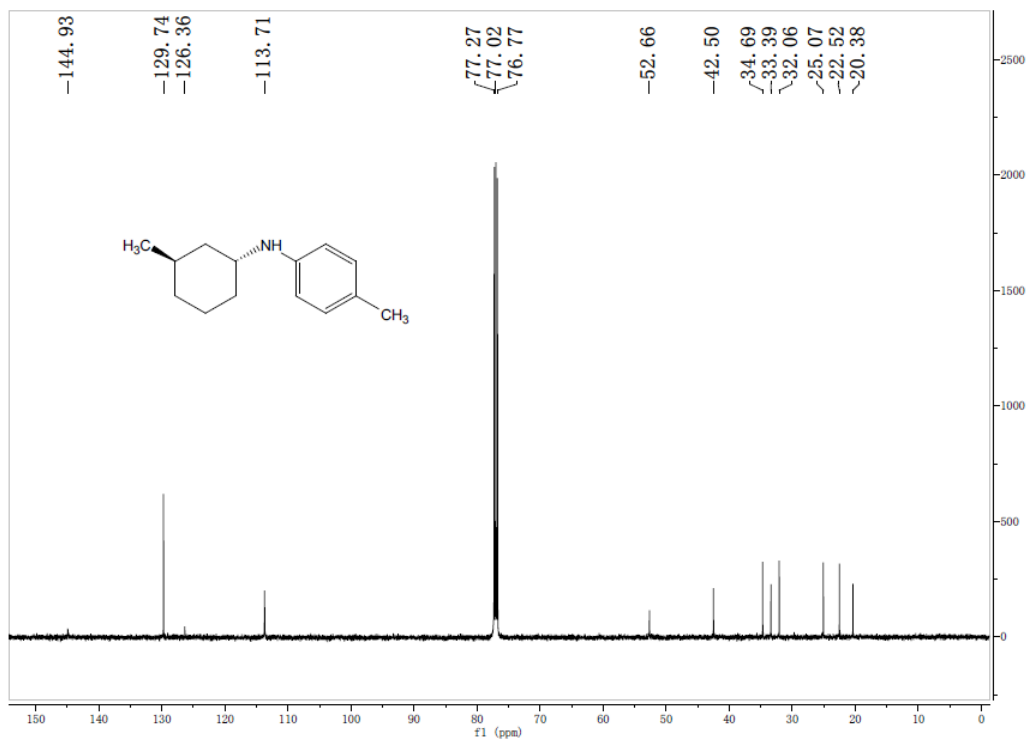



**<sup>1</sup>H NMR and <sup>13</sup>C NMR of *cis*-4-methyl-*N*-(2-methylcyclohexyl)aniline (4c)**

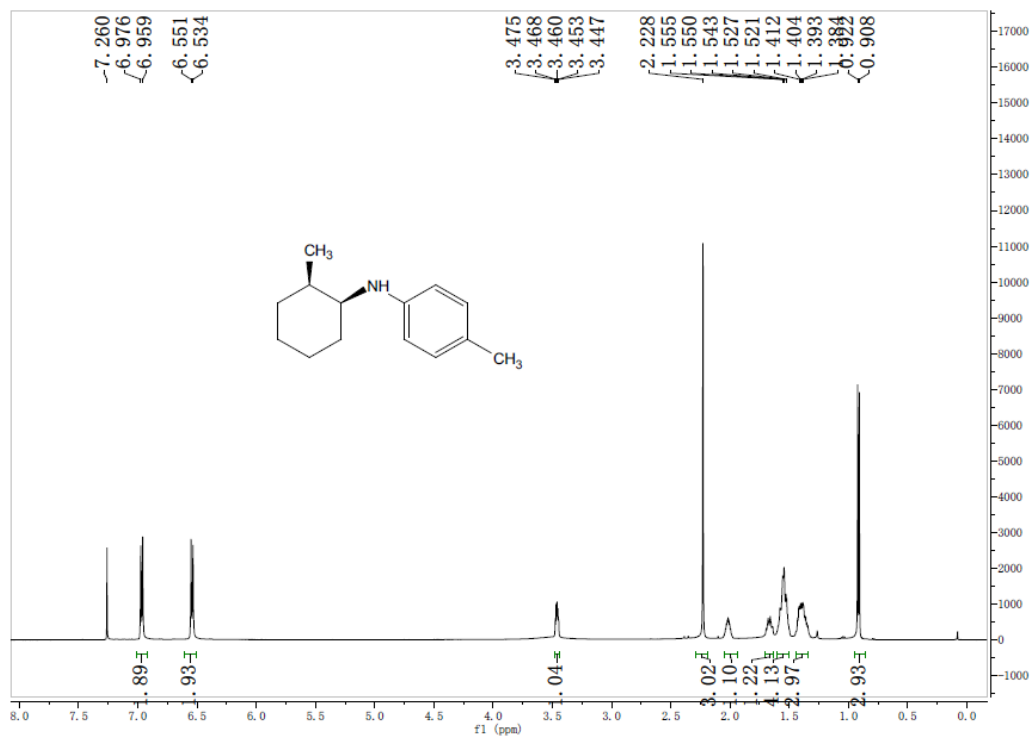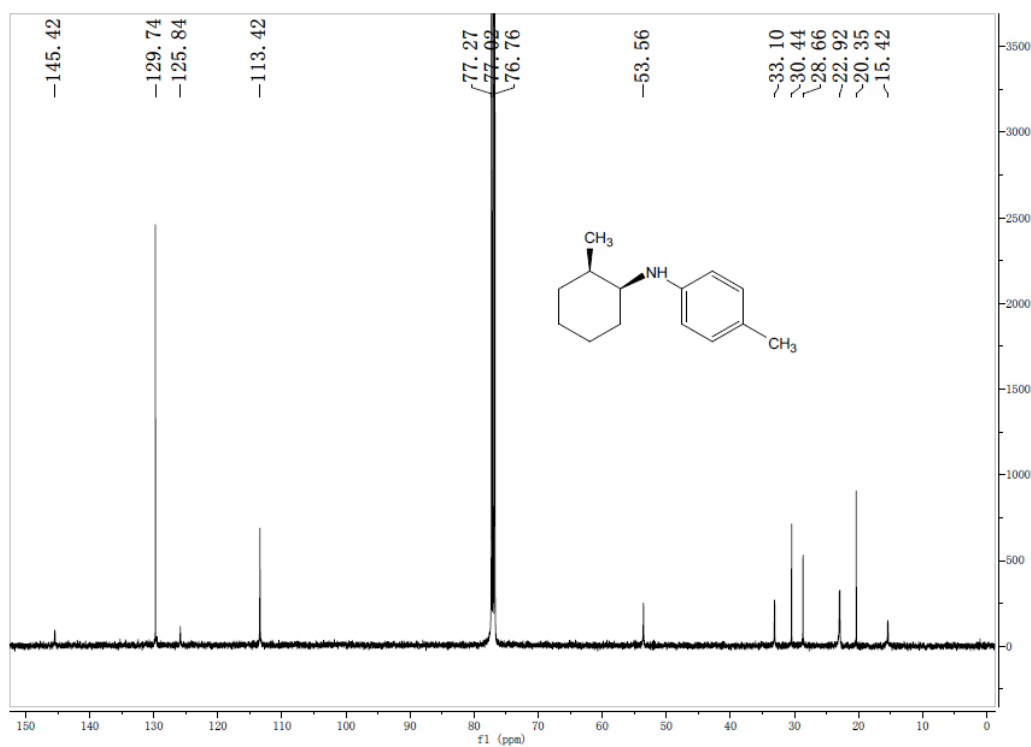

**<sup>1</sup>H NMR and <sup>13</sup>C NMR of *cis*-N-(4-propylcyclohexyl)aniline (4d)**

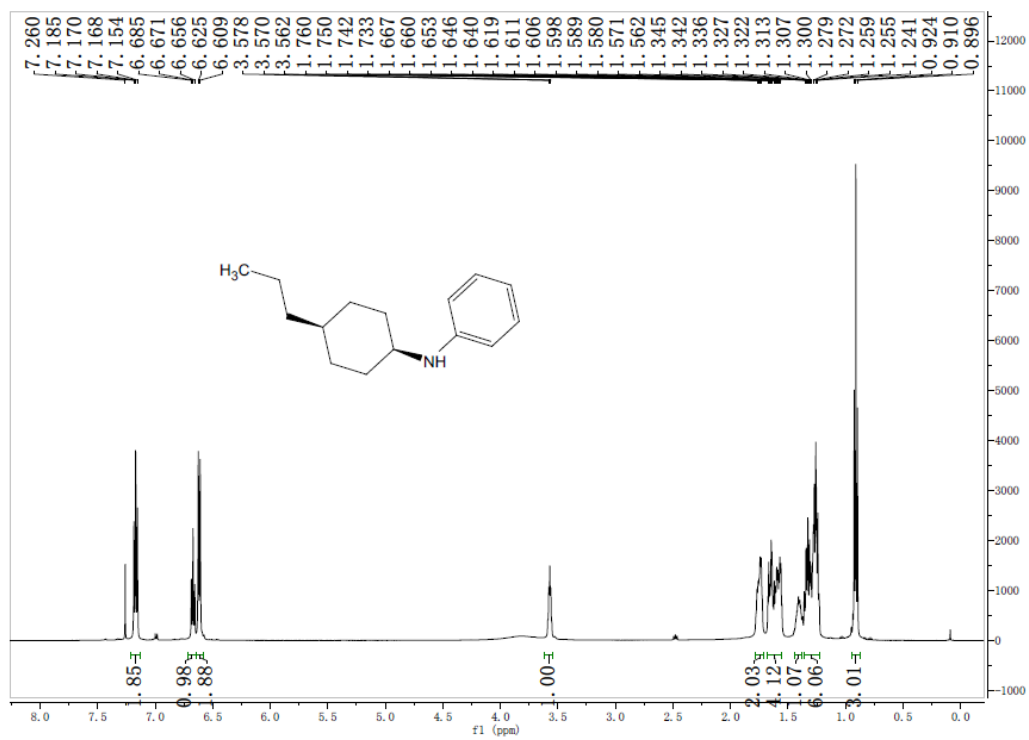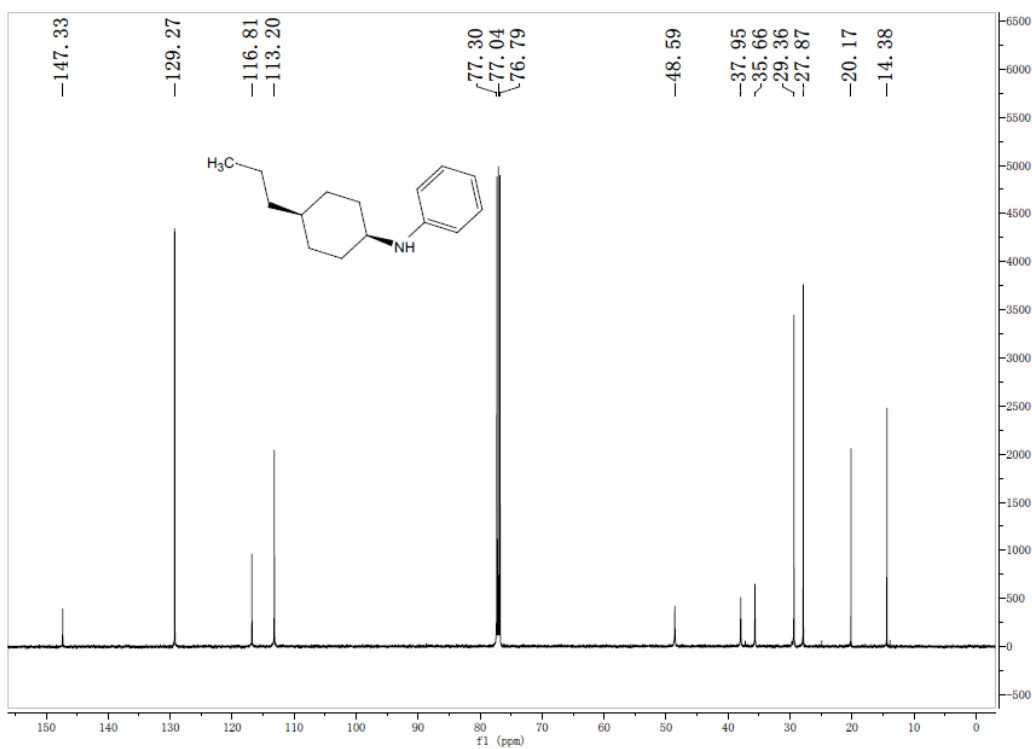

<sup>1</sup>H NMR and <sup>13</sup>C NMR of *cis*-*N*-(3-isopropylcyclohexyl)aniline (**4e**)

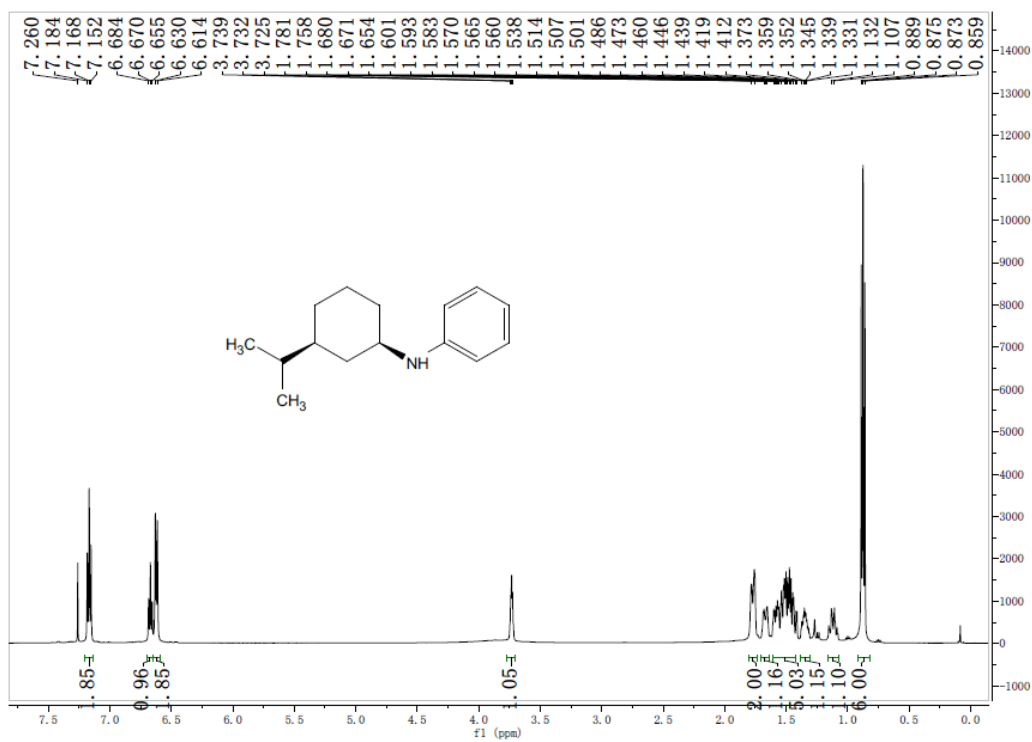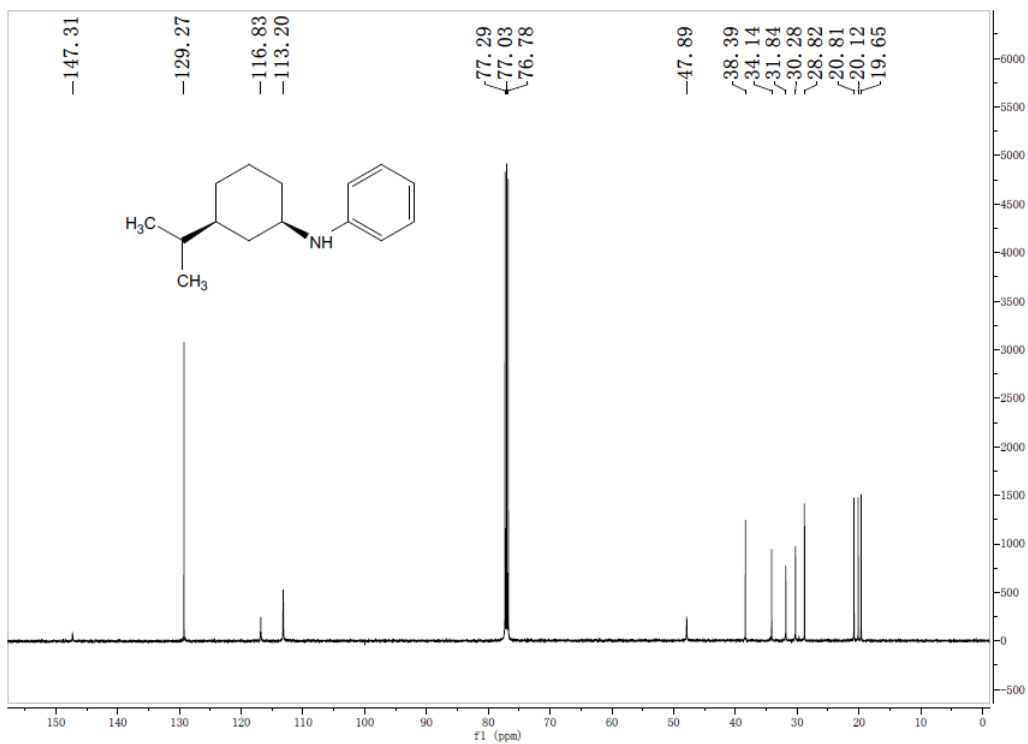

<sup>1</sup>H NMR and <sup>13</sup>C NMR of *cis*-*N*-phenyl-[1,1'-bi(cyclohexan)]-4-amine (4f)

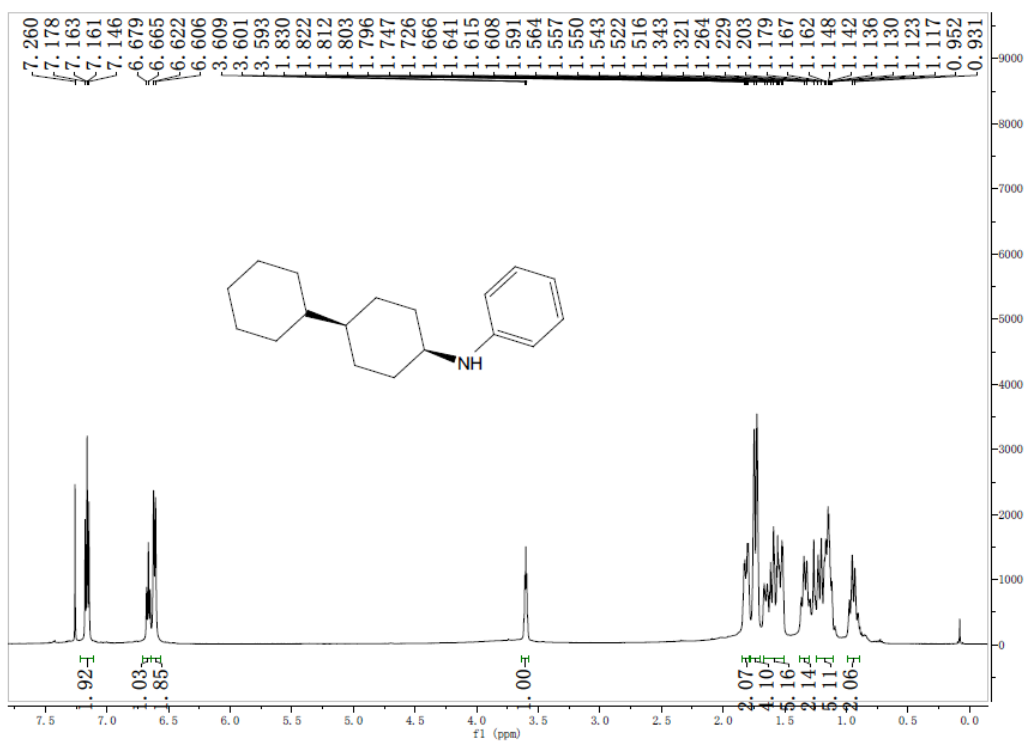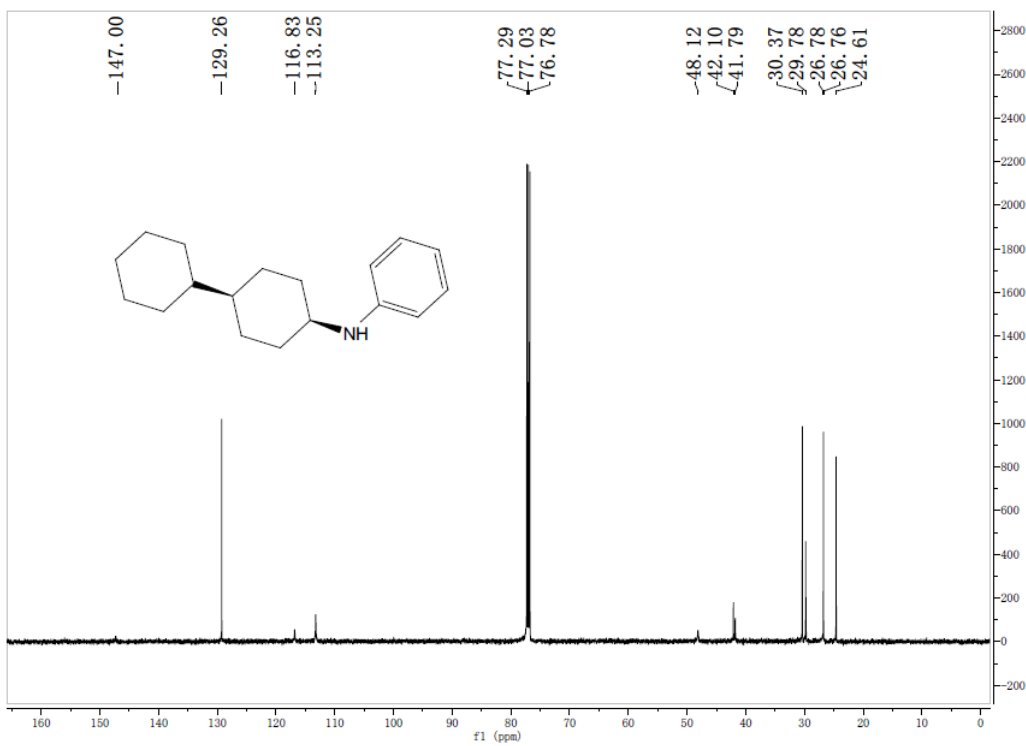

**<sup>1</sup>H NMR and <sup>13</sup>C NMR of *cis*-*N*-(4-(*tert*-butyl)cyclohexyl)-4-methylaniline (4g)**

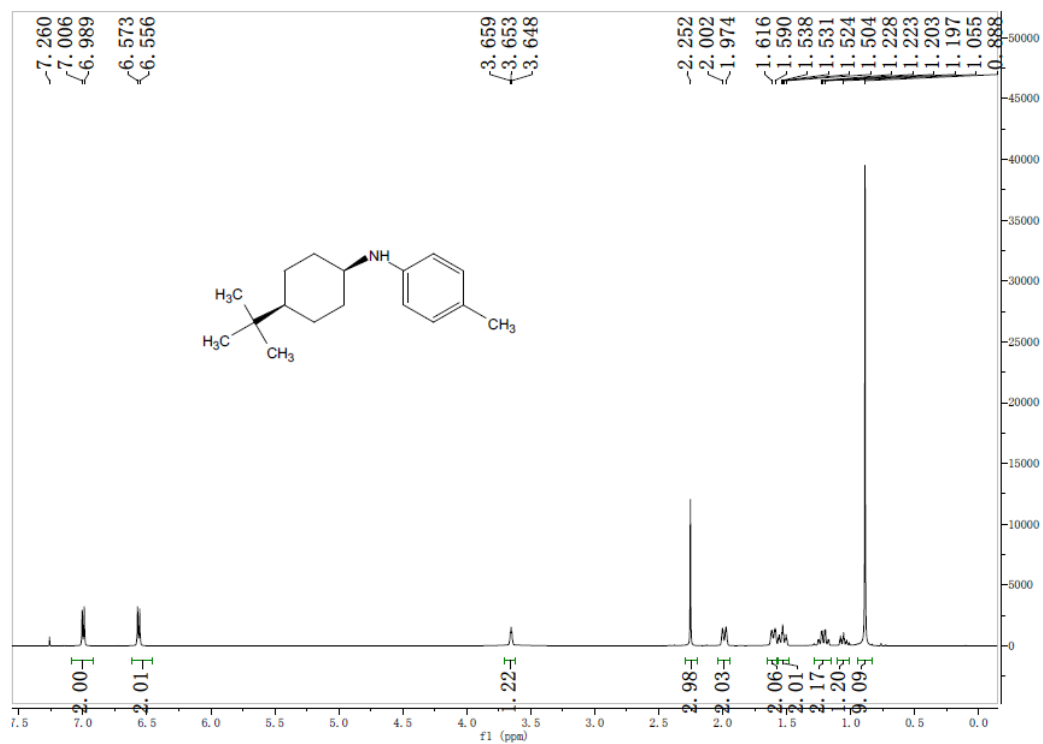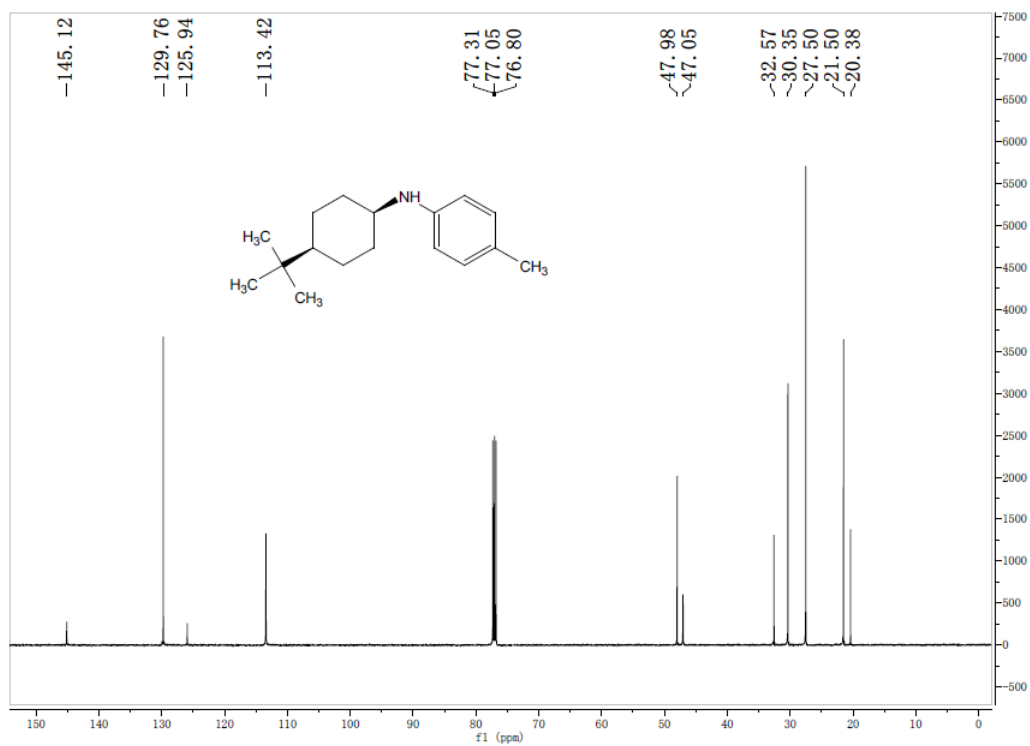

**<sup>1</sup>H NMR and <sup>13</sup>C NMR of *trans*-*N*-(4-(*tert*-butyl)cyclohexyl)-4-methylaniline (4g)**

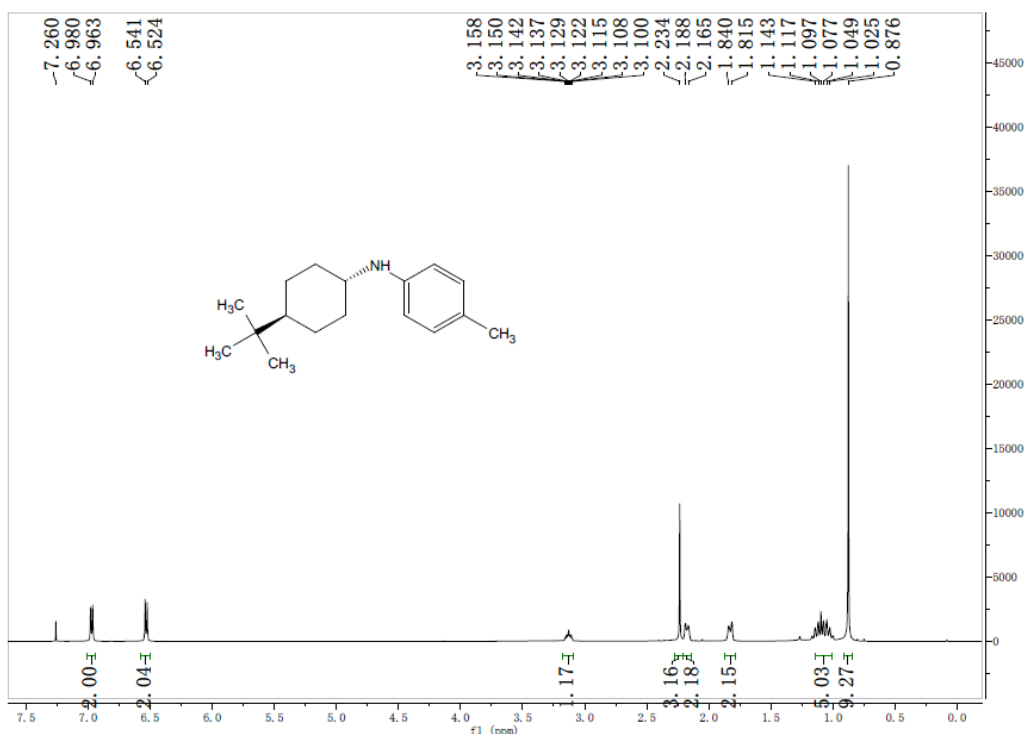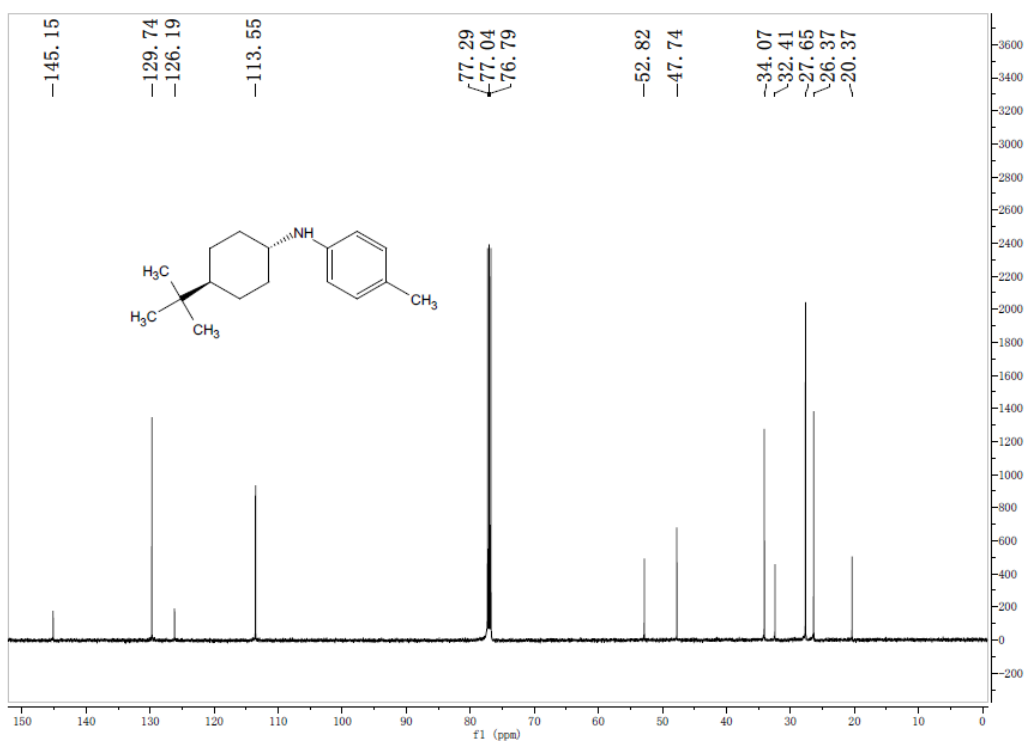

**<sup>1</sup>H NMR and <sup>13</sup>C NMR of *cis*-*N*-(4-methoxycyclohexyl)-4-methylaniline (4h)**

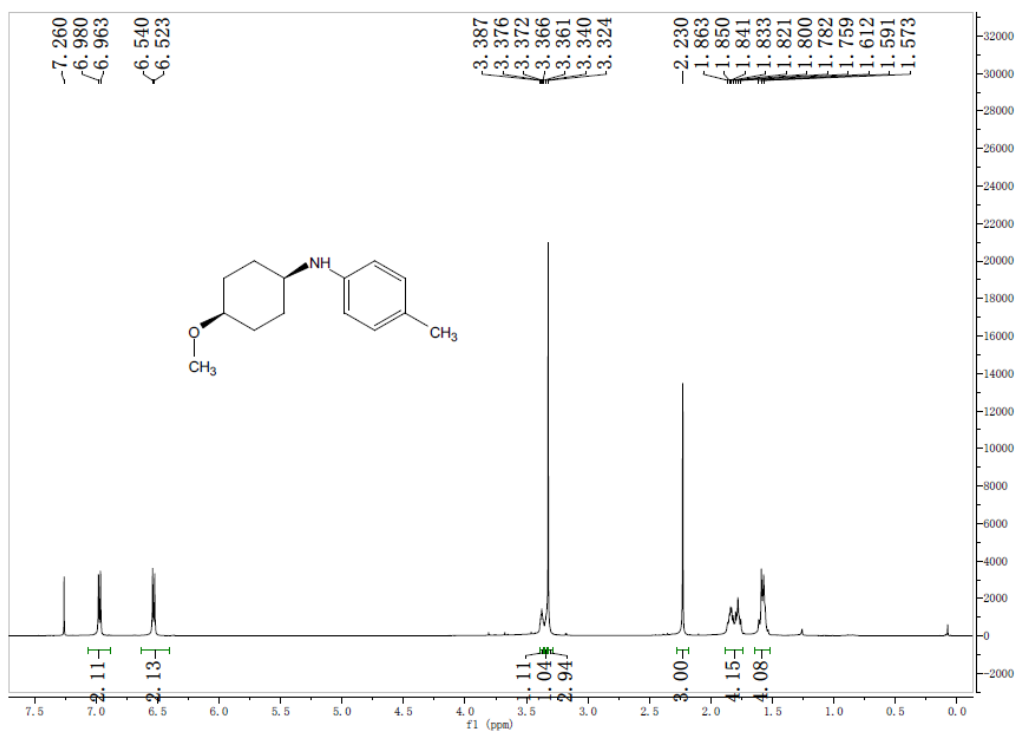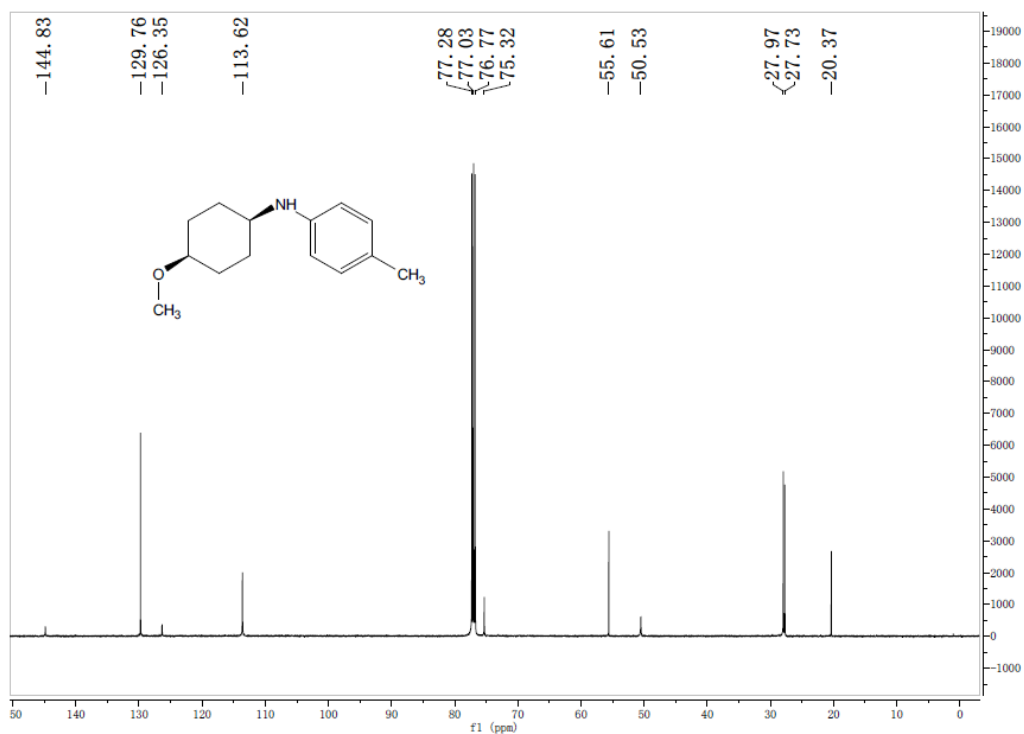

**<sup>1</sup>H NMR and <sup>13</sup>C NMR of *trans*-*N*-(4-methoxycyclohexyl)-4-methylaniline (4h)**

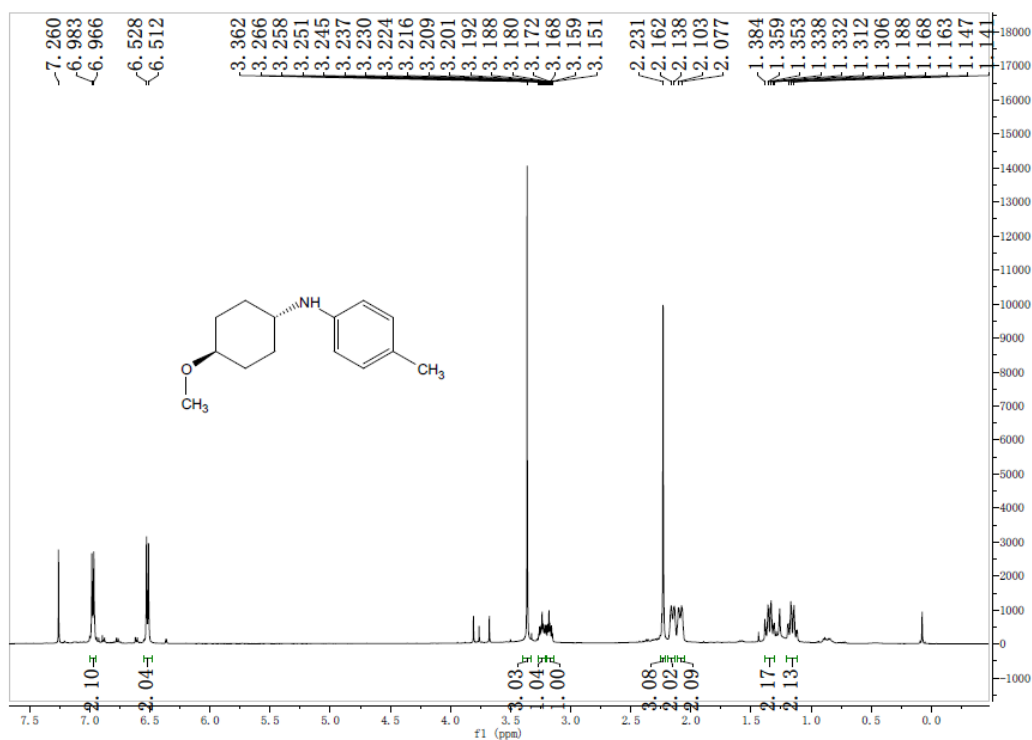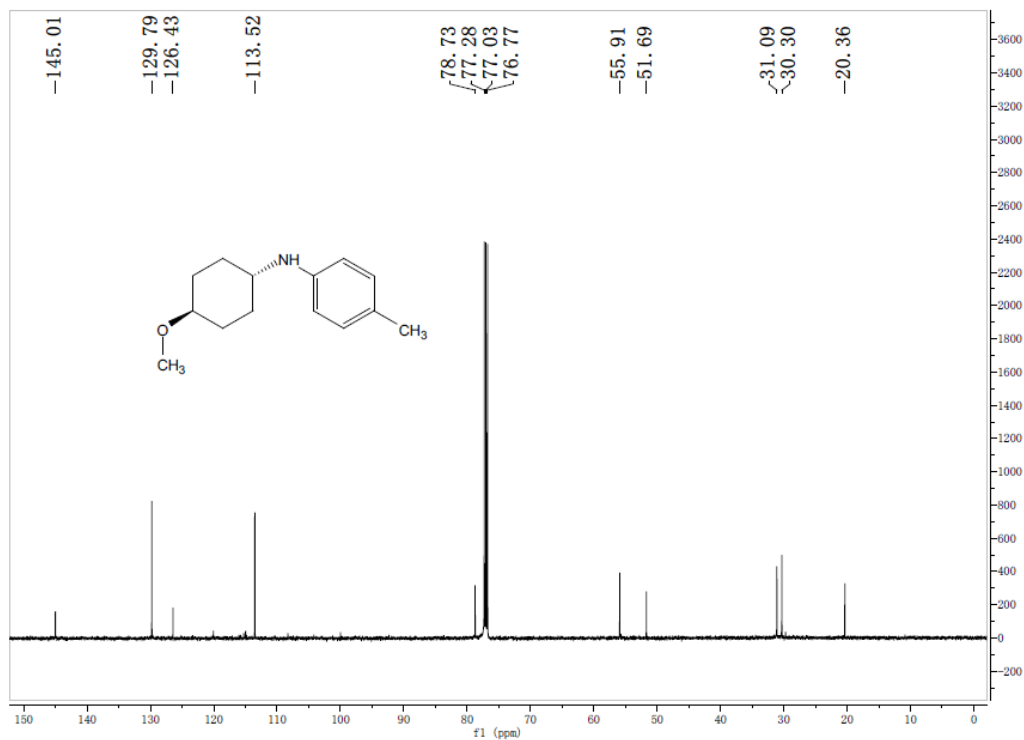



**<sup>1</sup>H NMR and <sup>13</sup>C NMR of *cis*-*N*-(2-methoxycyclohexyl)aniline (4i)**

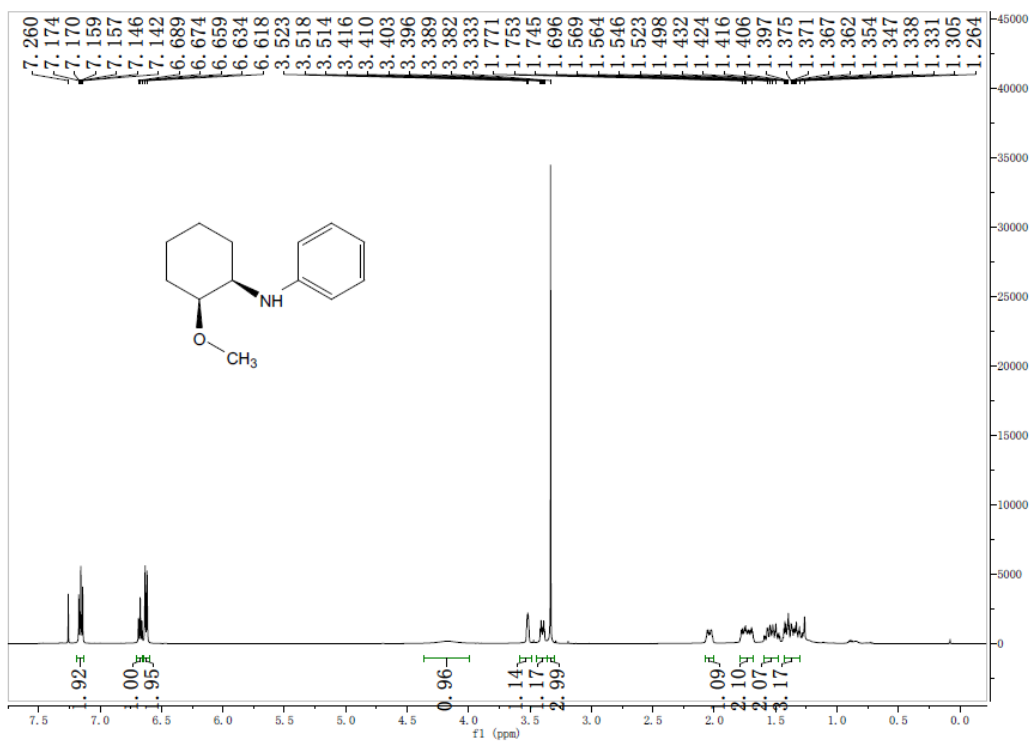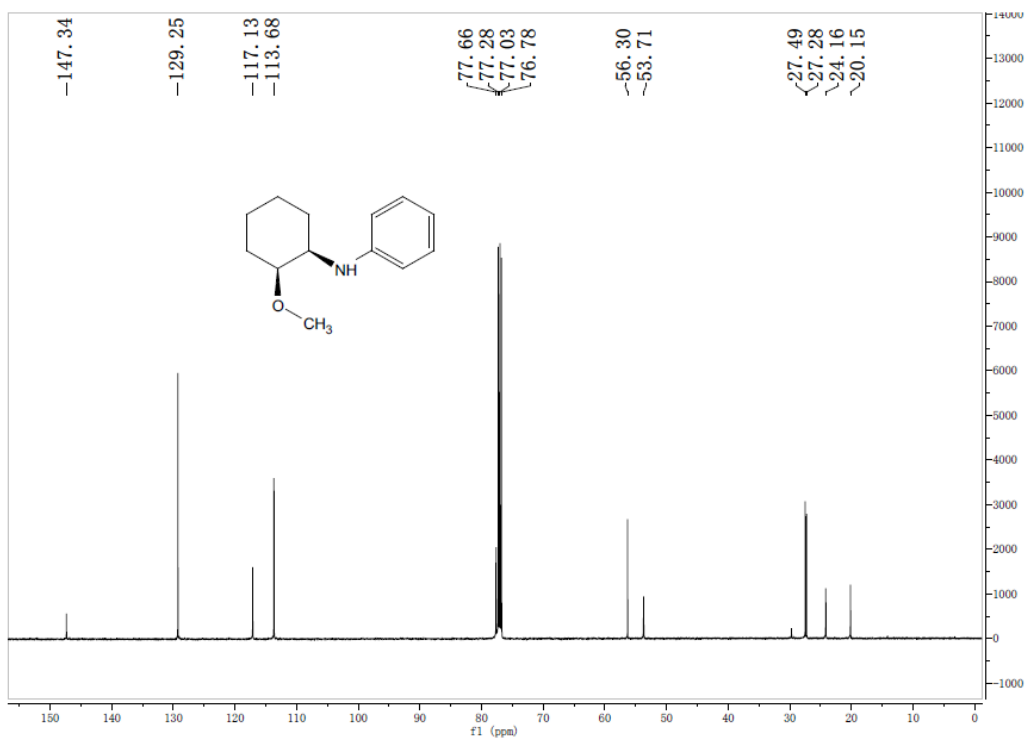

**<sup>1</sup>H NMR and <sup>13</sup>C NMR of *cis*-3-methoxy-*N*-(4-methylcyclohexyl)aniline (4j)**

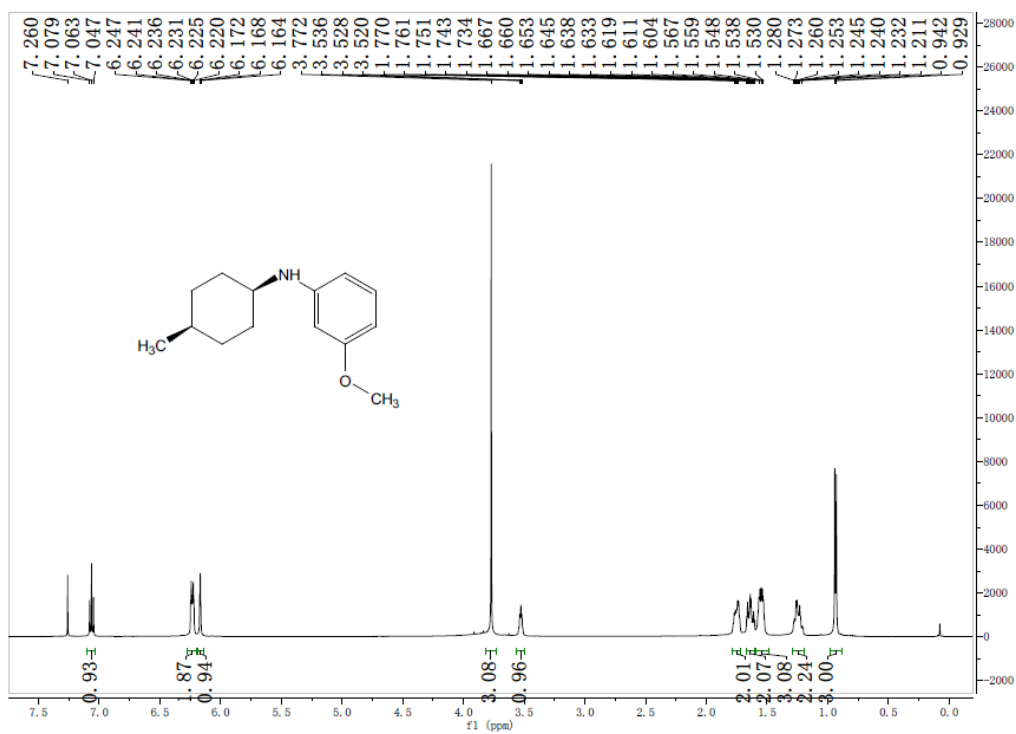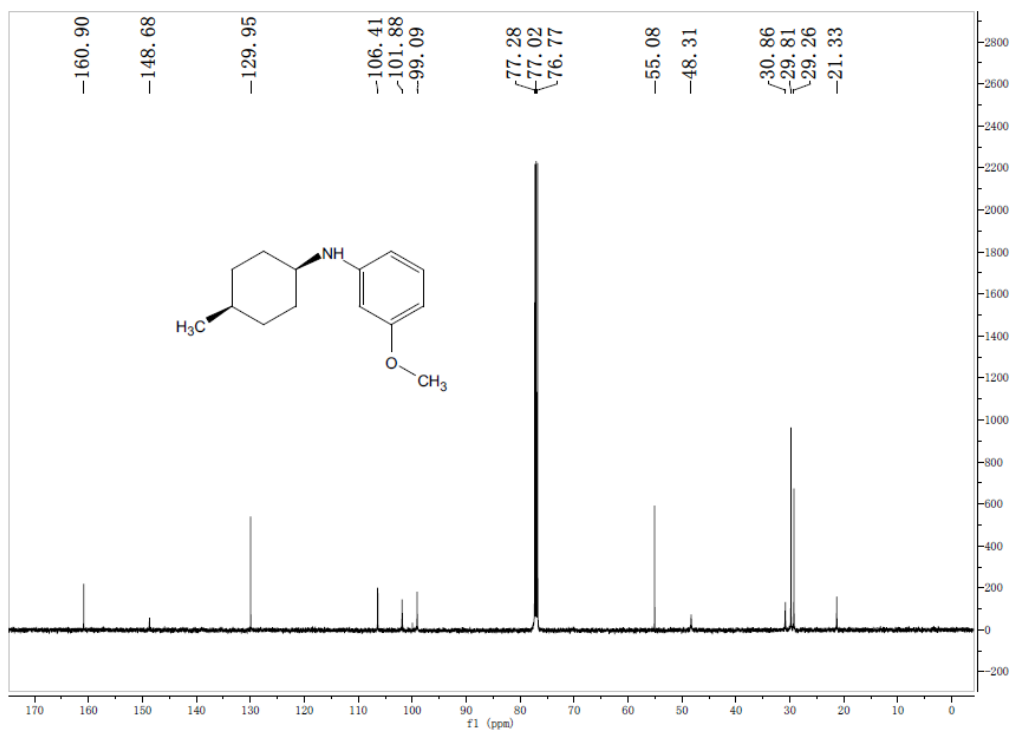

<sup>1</sup>H NMR and <sup>13</sup>C NMR of *trans*-3-methoxy-*N*-(4-methylcyclohexyl)aniline (4j)

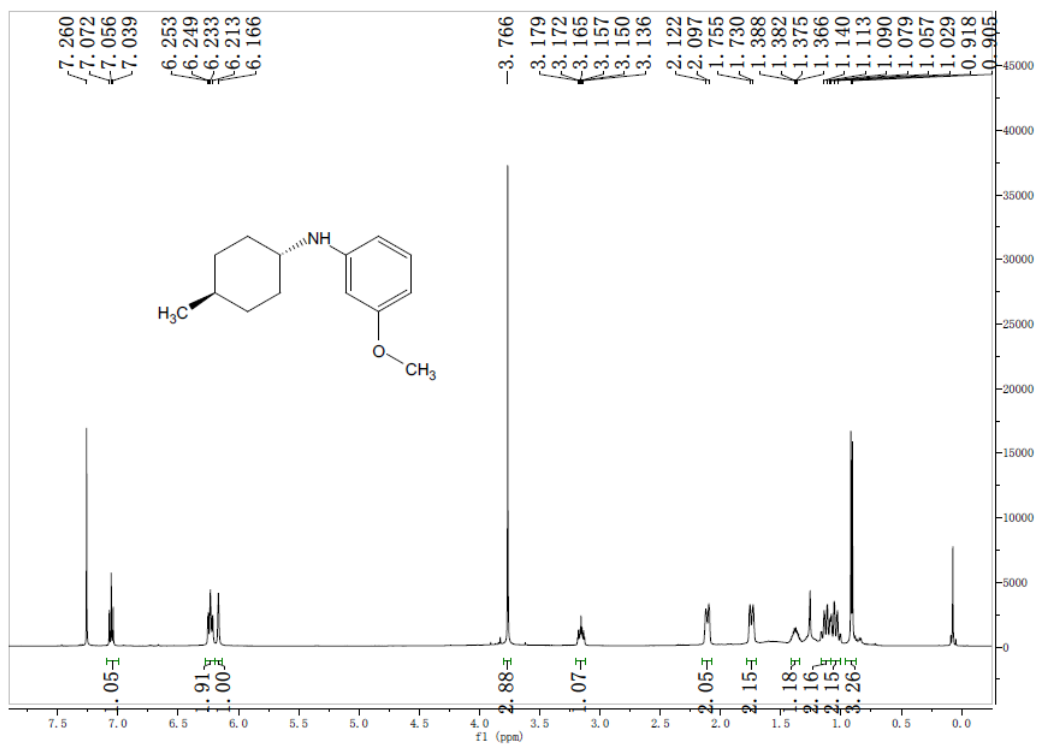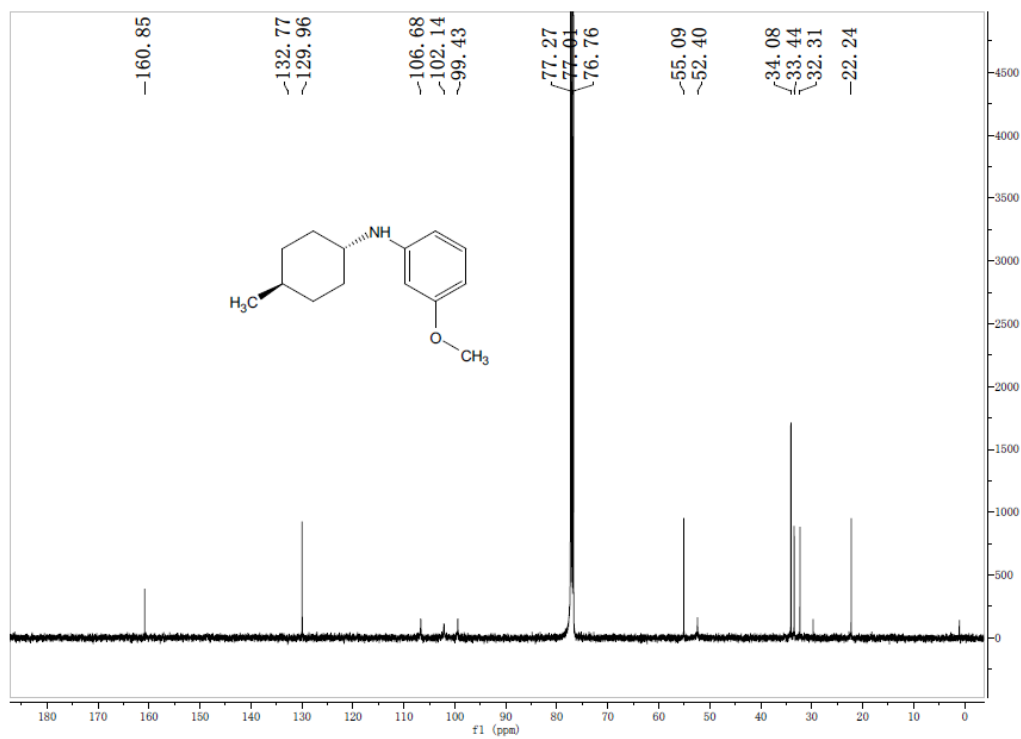

<sup>1</sup>H NMR and <sup>13</sup>C NMR of *cis*-3-methoxy-*N*-(3-methylcyclohexyl)aniline (4k)

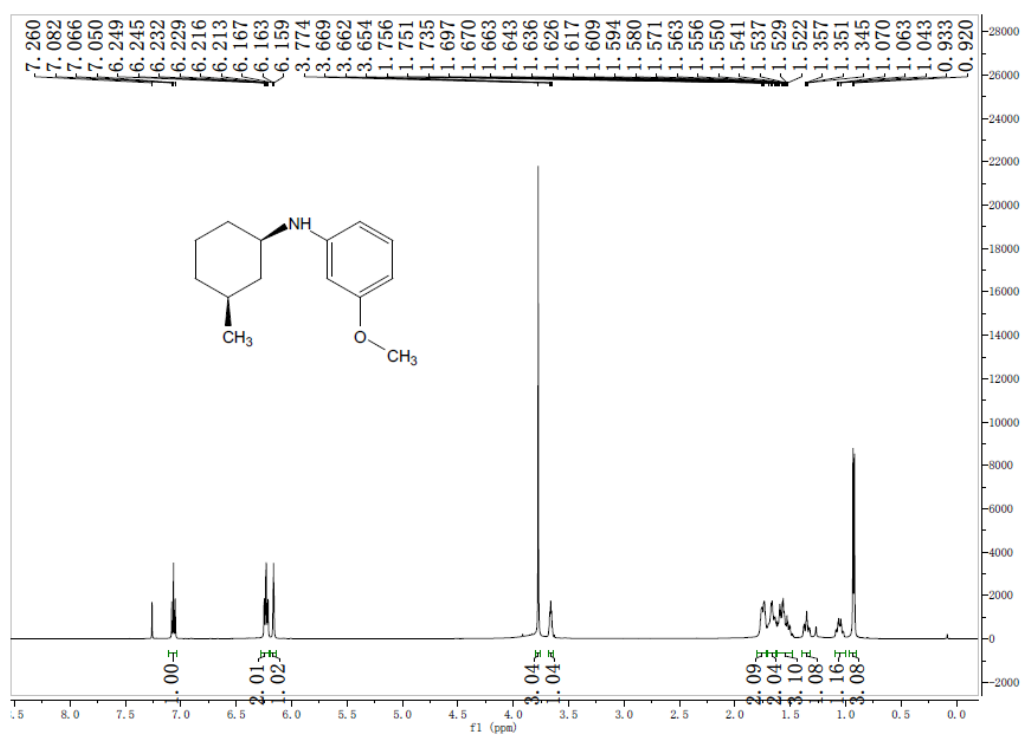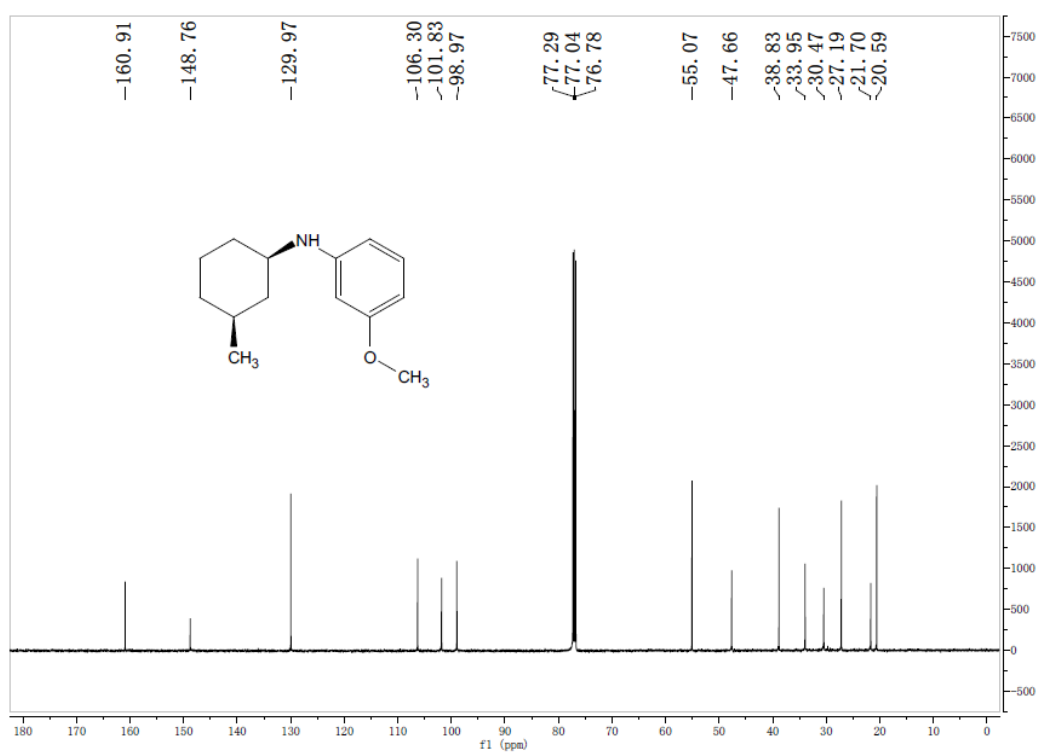

<sup>1</sup>H NMR and <sup>13</sup>C NMR of *trans*-3-methoxy-*N*-(3-methylcyclohexyl)aniline (4k)

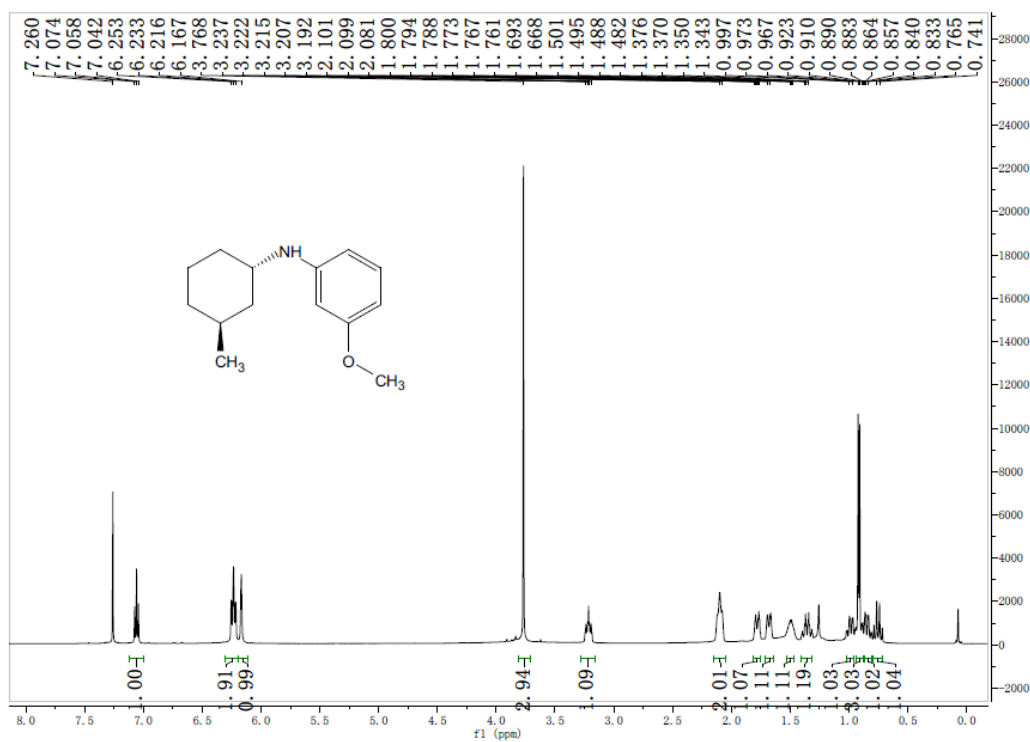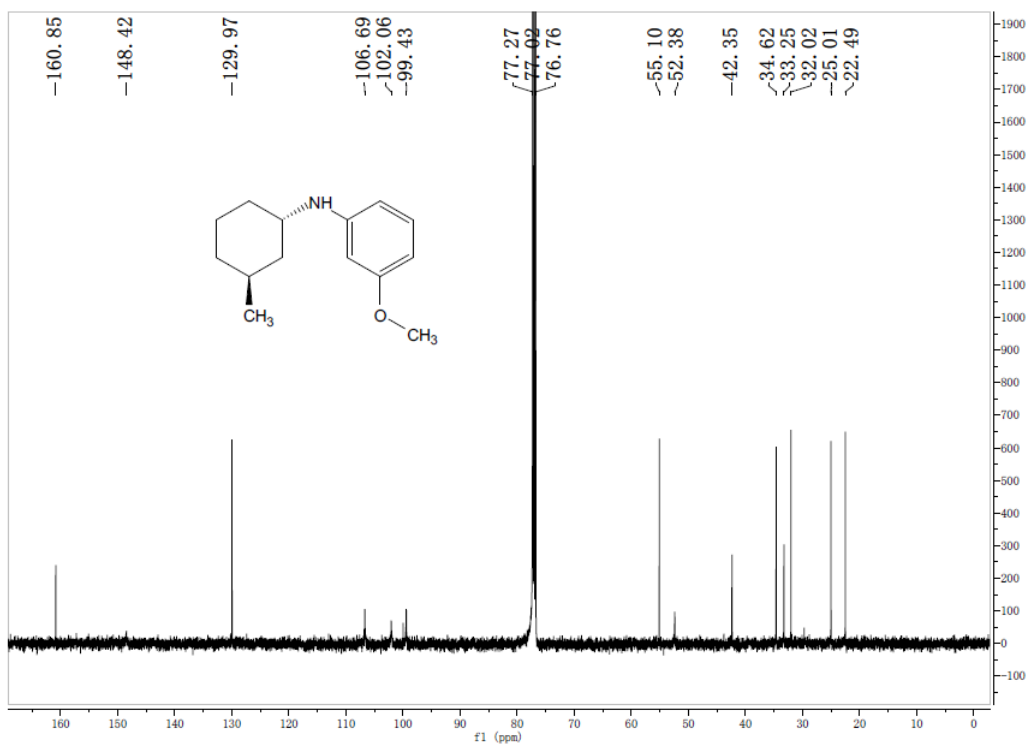

**<sup>1</sup>H NMR and <sup>13</sup>C NMR of *cis*-methyl 2-(4-(phenylamino)cyclohexyl)acetate (4l)**

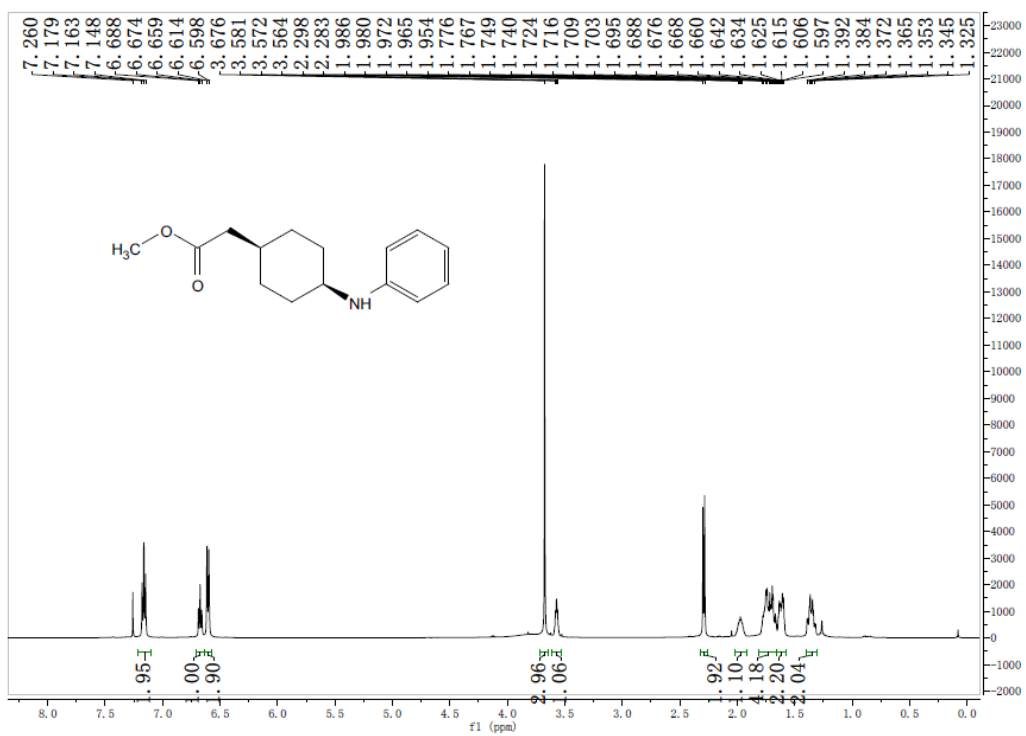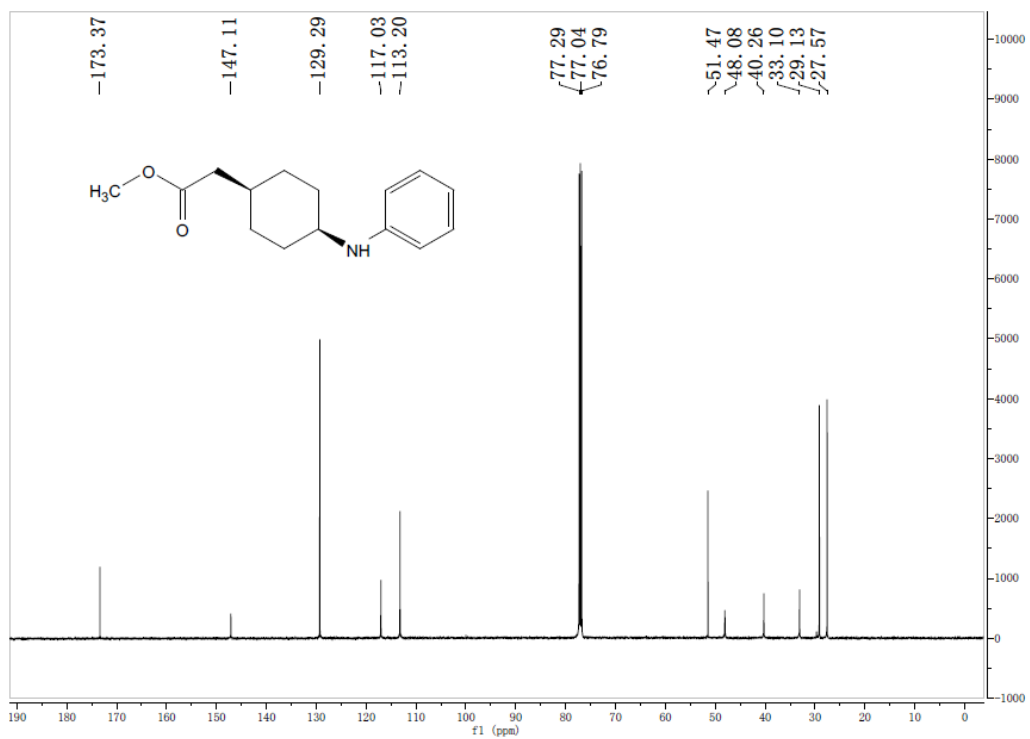

**<sup>1</sup>H NMR and <sup>13</sup>C NMR of *trans*-methyl 2-(4-(phenylamino)cyclohexyl)acetate (4l)**

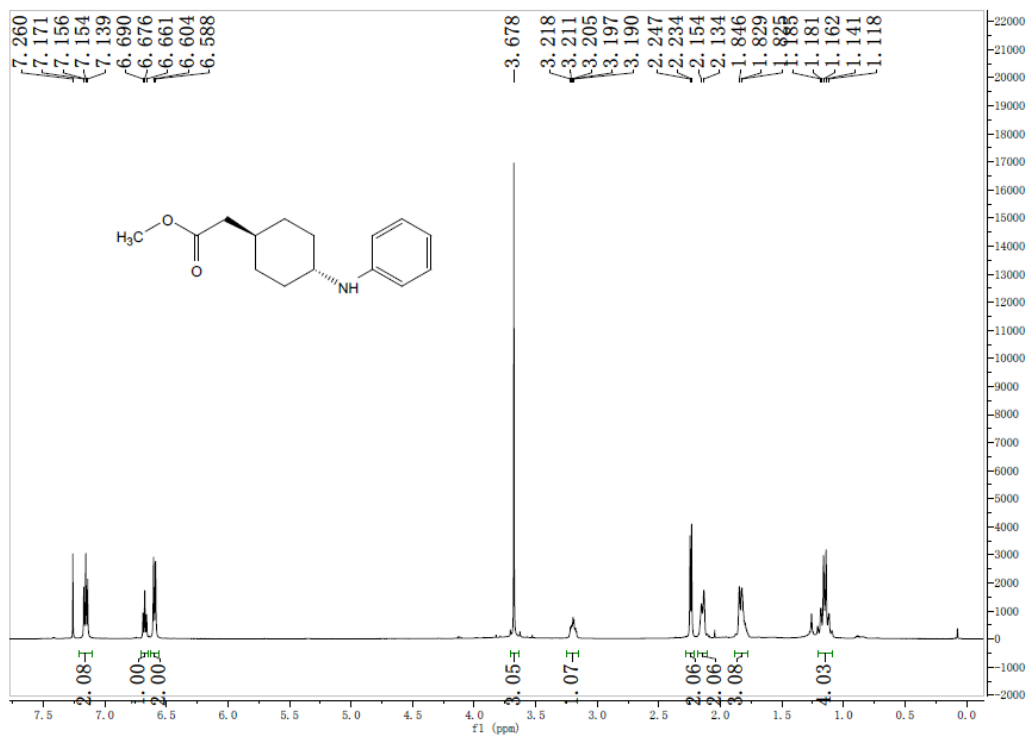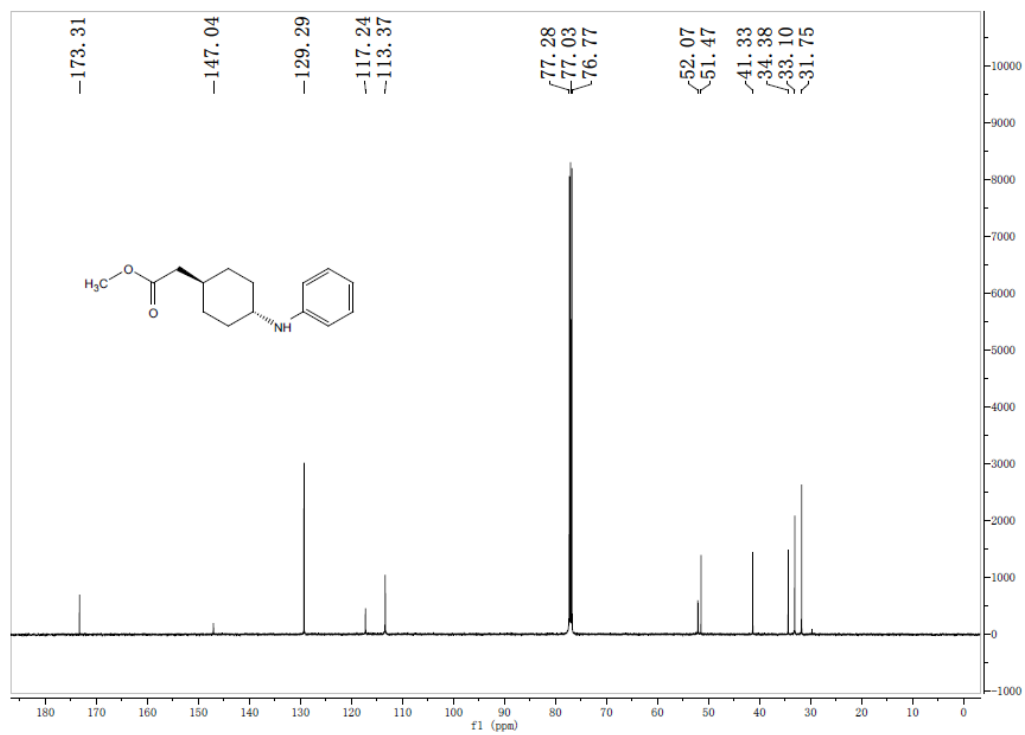

**<sup>1</sup>H NMR and <sup>13</sup>C NMR of *cis*-*N*-(3-(trifluoromethyl)cyclohexyl)aniline (4m)**

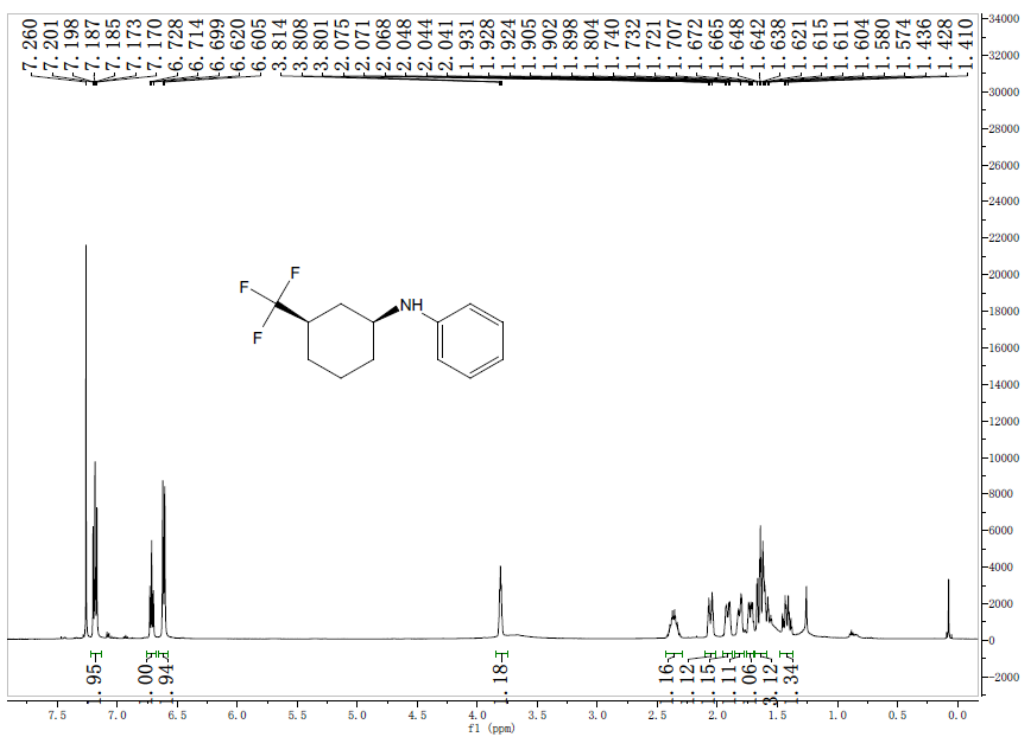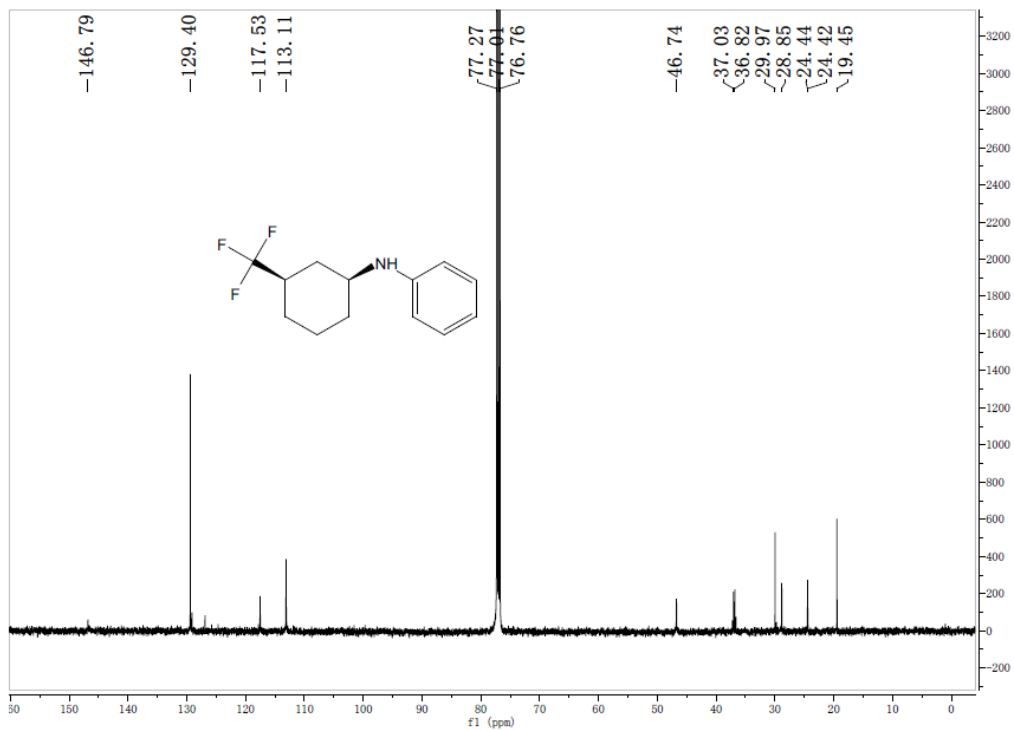



<sup>1</sup>H NMR and <sup>13</sup>C NMR of *trans*-N-(3-(trifluoromethyl)cyclohexyl)aniline (4m)

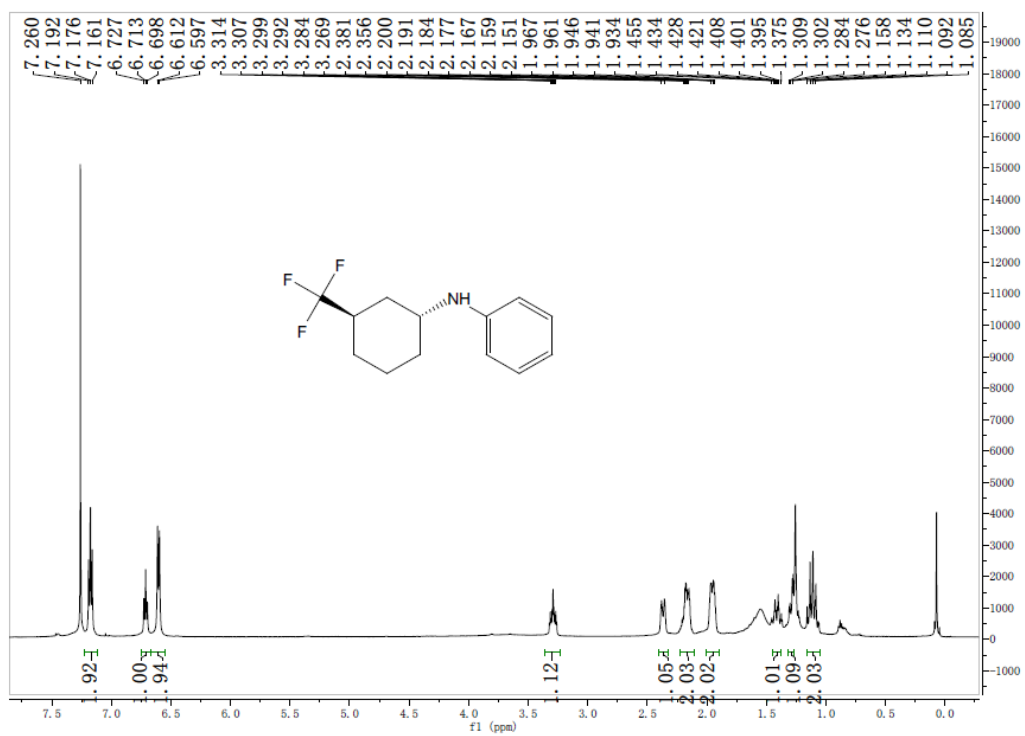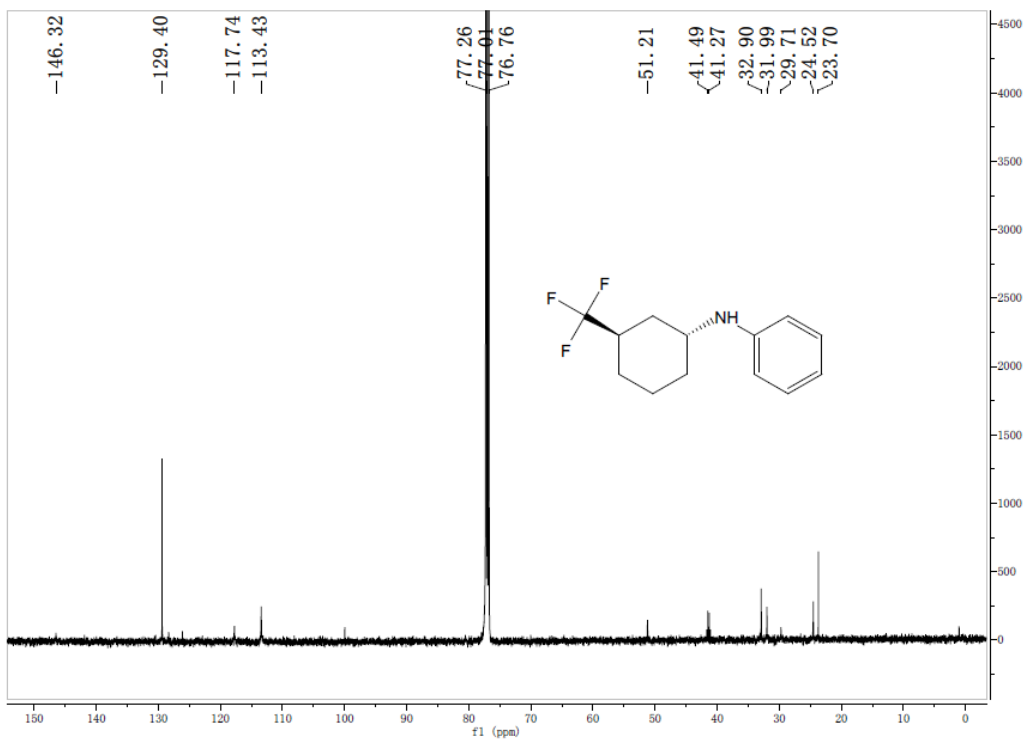

**<sup>1</sup>H NMR and <sup>13</sup>C NMR of *N*-(*p*-tolyl)-1,2,3,4-tetrahydronaphthalen-1-amine (4n)**

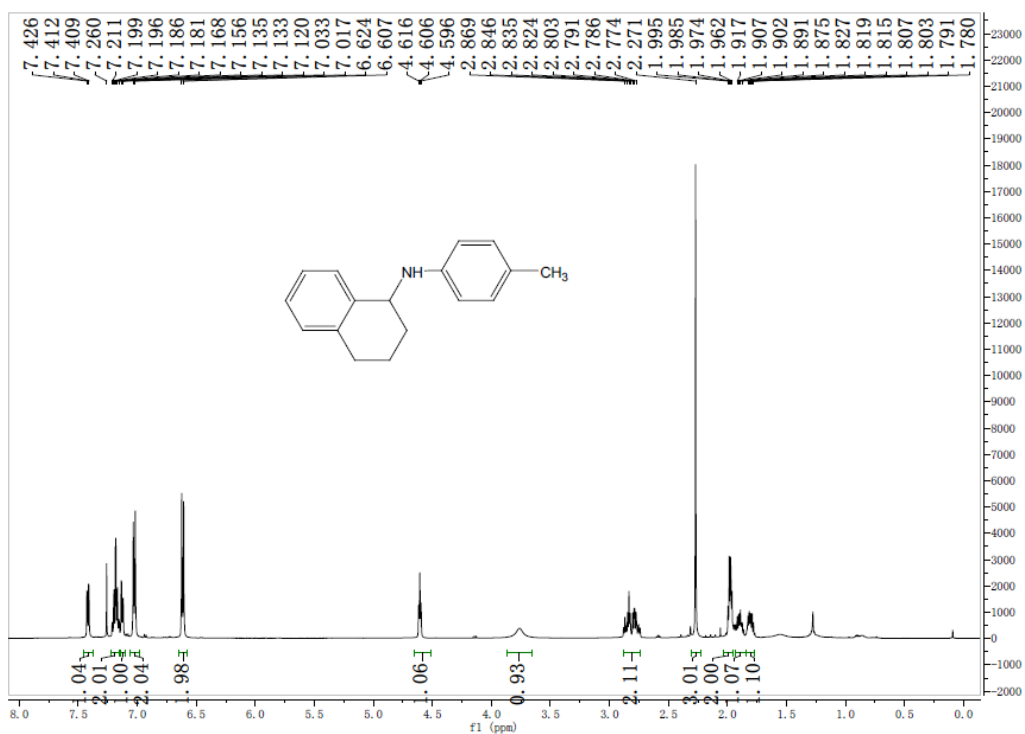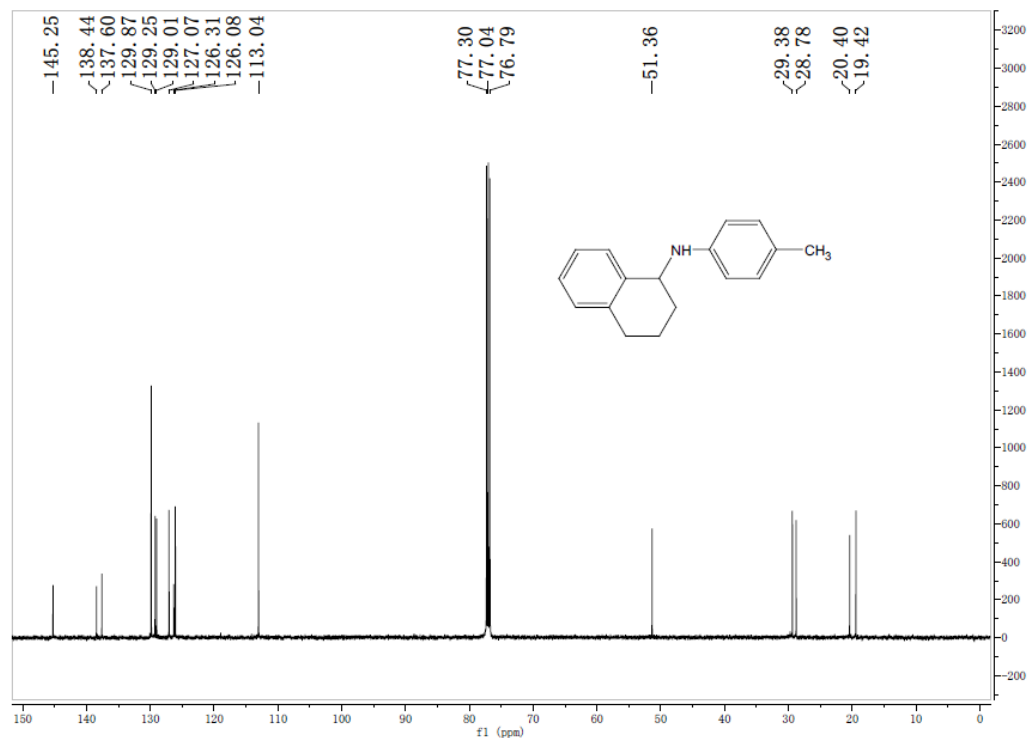

**<sup>1</sup>H NMR and <sup>13</sup>C NMR of *N*-(*p*-tolyl)-1,2,3,4-tetrahydronaphthalen-2-amine (4o)**

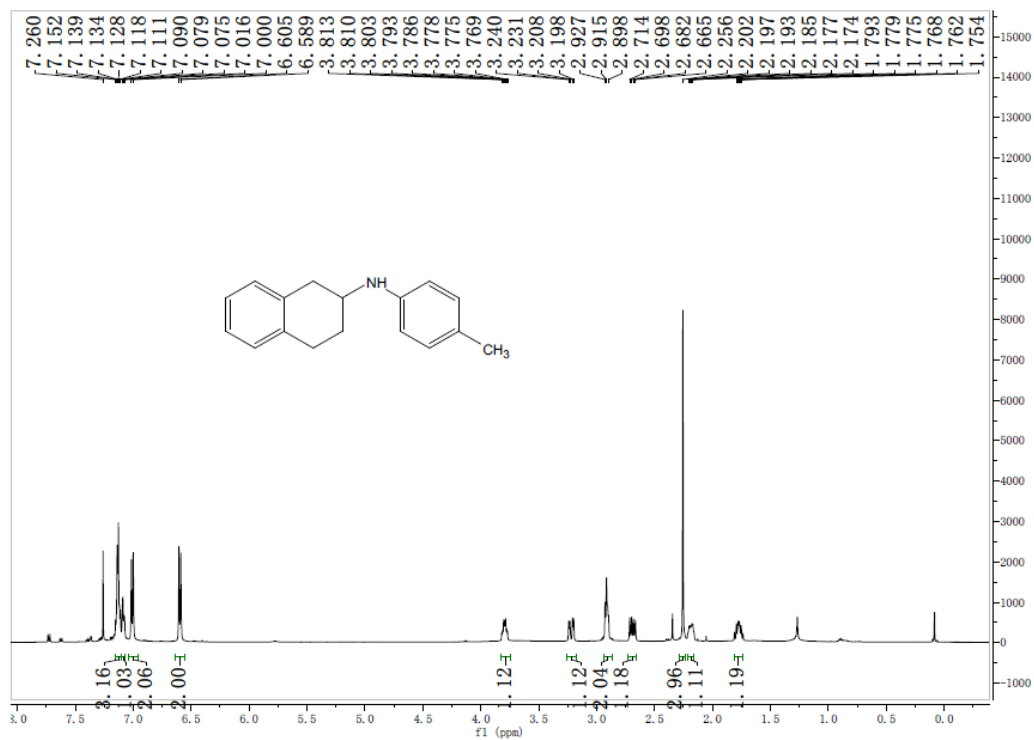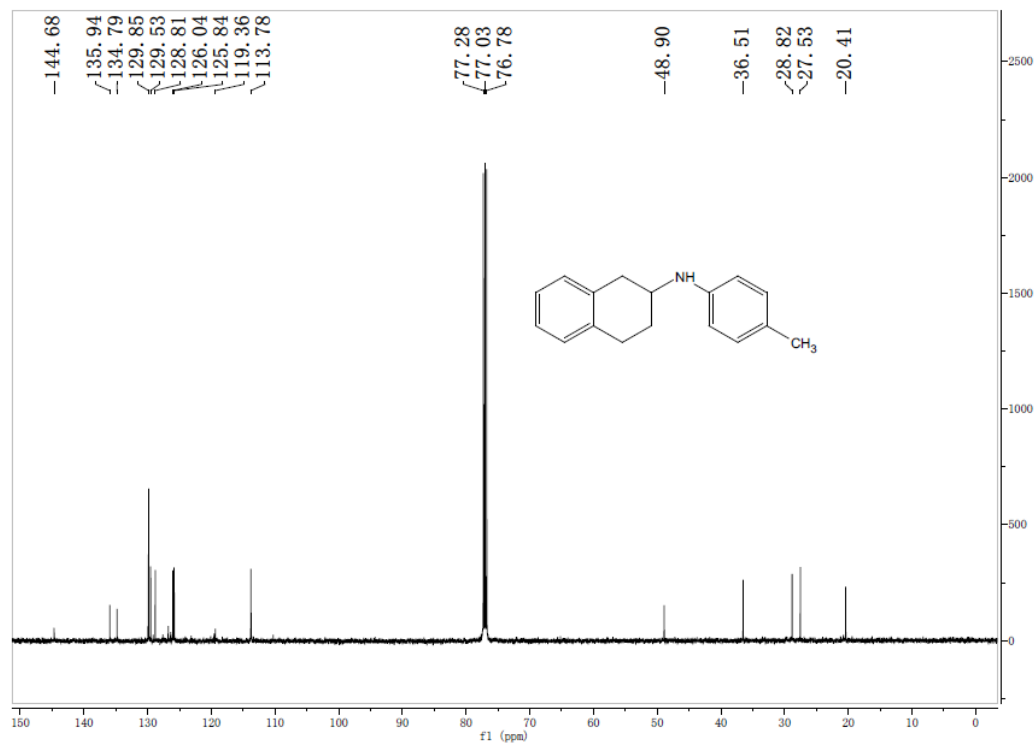

### <sup>1</sup>H NMR and <sup>13</sup>C NMR of 2-(phenylamino)cyclohexanone (4p)

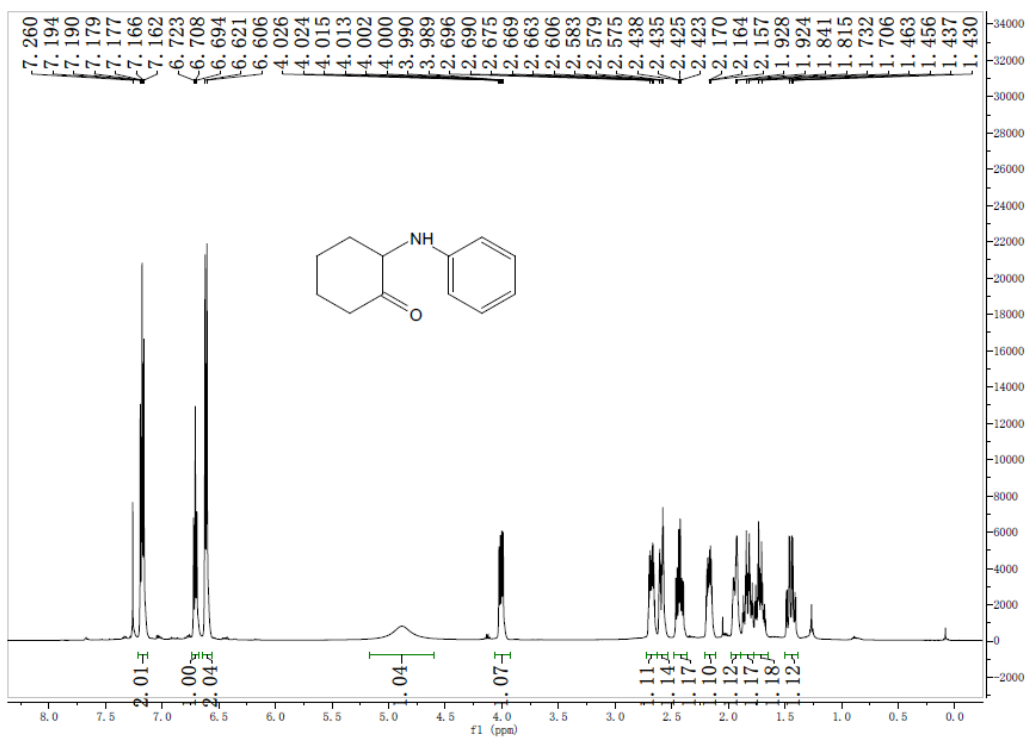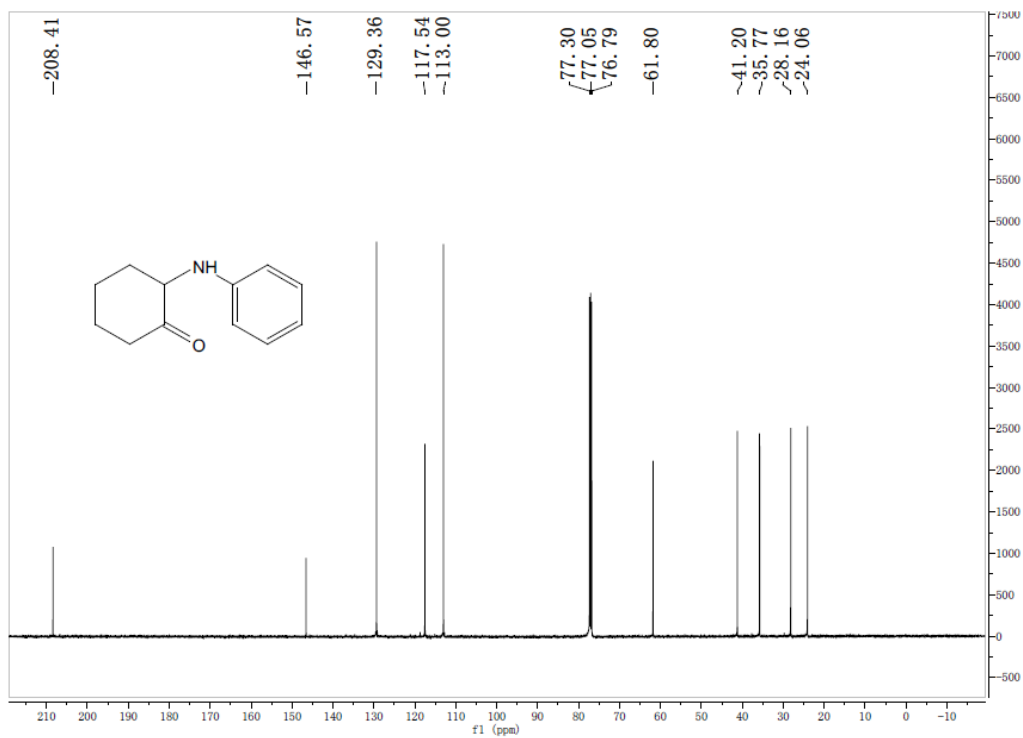

$^1\text{H}$  NMR and  $^{13}\text{C}$  NMR of *cis*- $N^1, N^4$ -diphenylcyclohexane-1,4-diamine (4q)

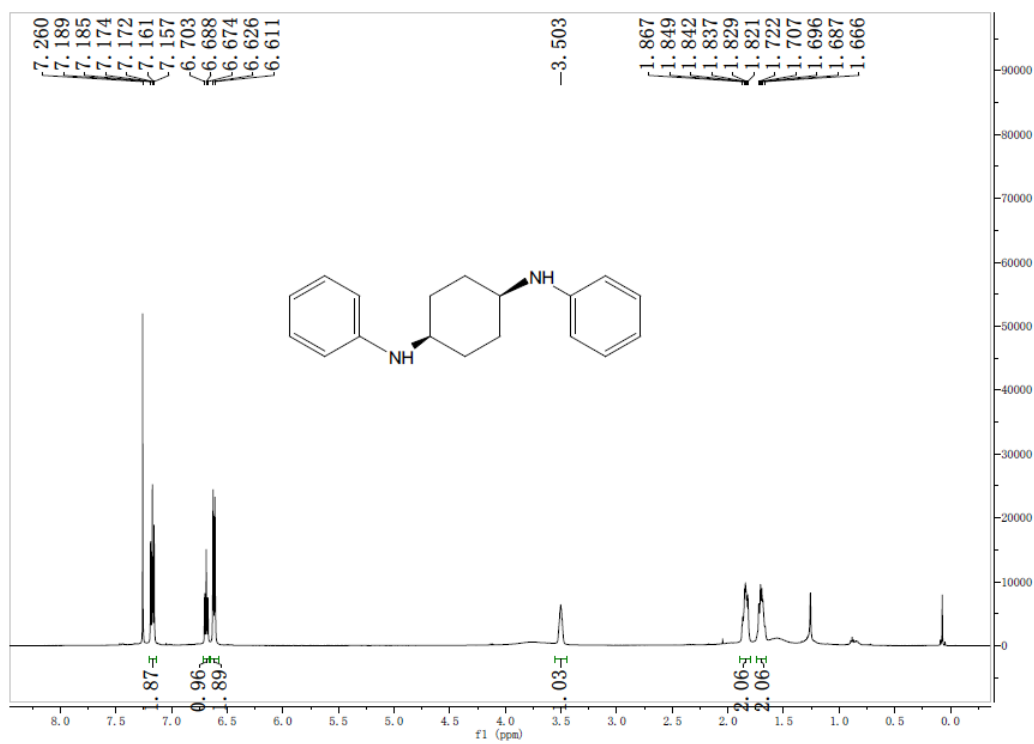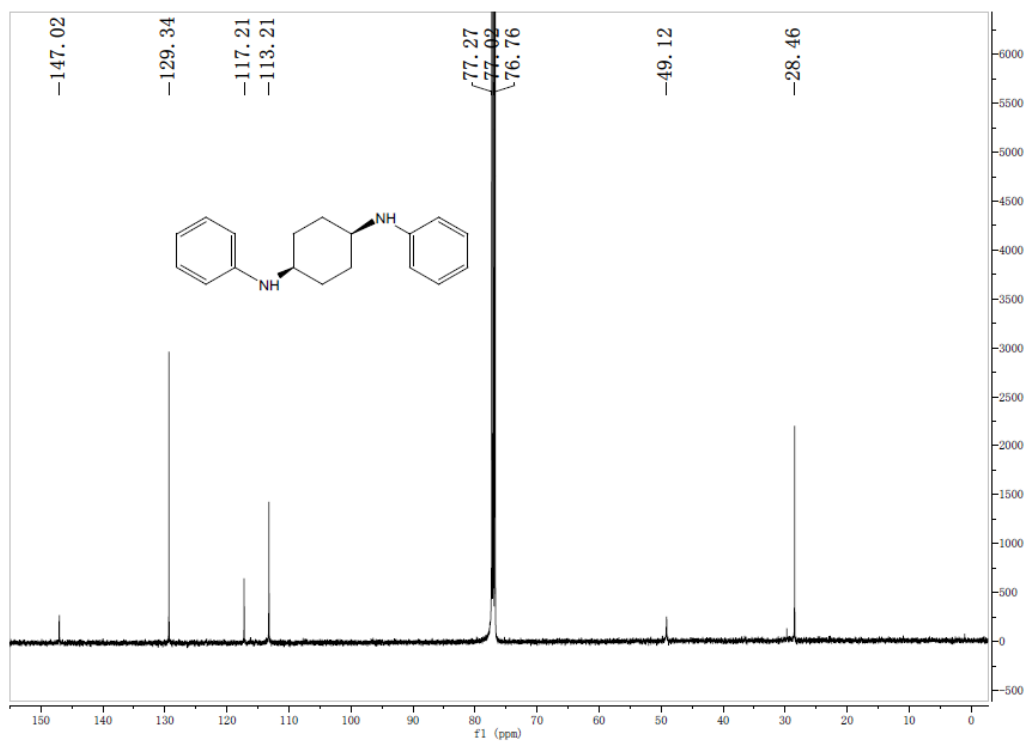

**<sup>1</sup>H NMR and <sup>13</sup>C NMR of *trans*-N<sup>1</sup>,N<sup>4</sup>-diphenylcyclohexane-1,4-diamine (4q)**

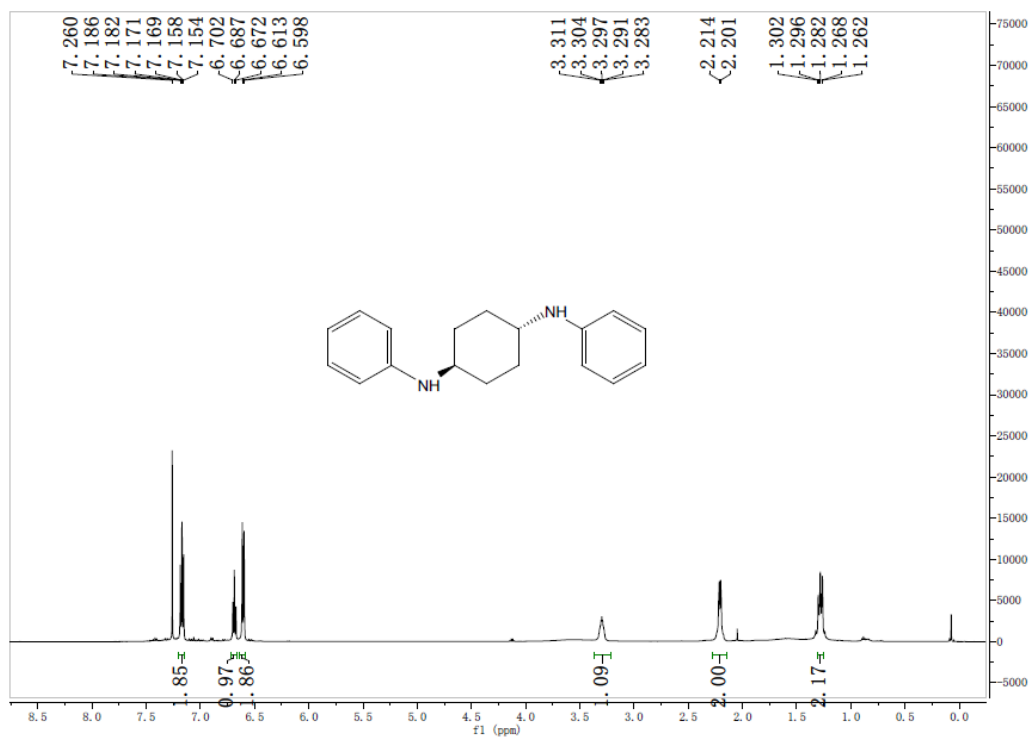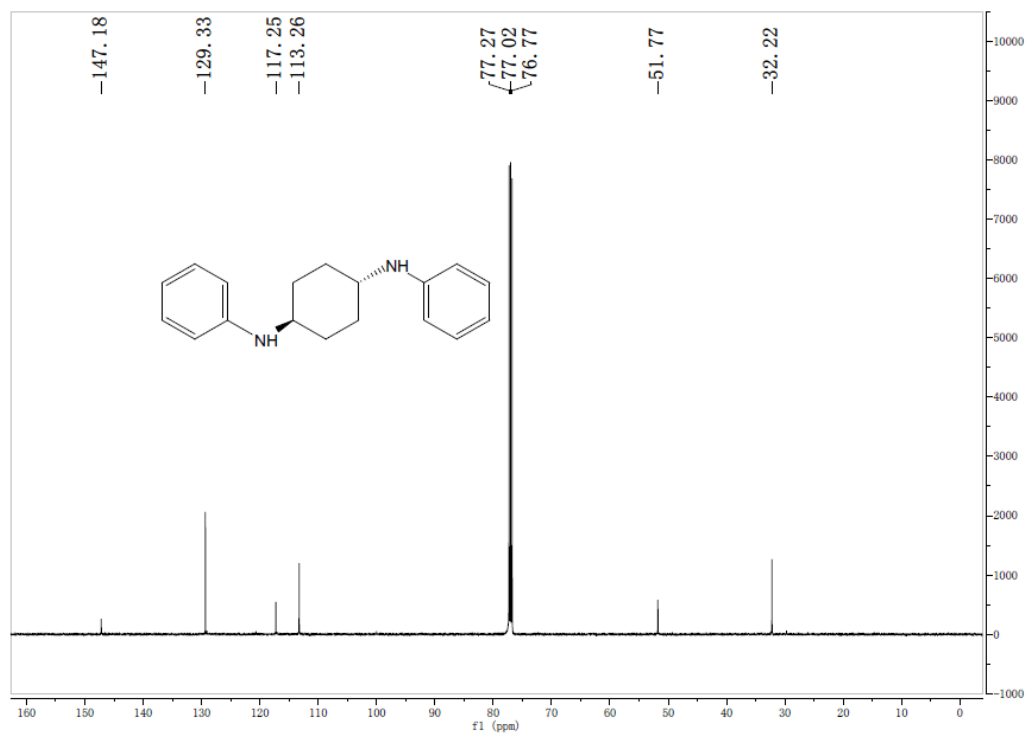

Supplement: SC-006-C5SC00941C-s001.pdf [file SC-006-C5SC00941C-s001.pdf]
